# Supplementary material for: Exploring the Natural Compounds in Flavonoids for Their Potential Inhibition of Cancer Therapeutic Target MEK1 Using Computational Methods
Source: MDPI journal article supplement (doi:10.3390/ph15020195), 2022-02-03
Supplement: s1 [file s1]

**Table S1.** Autodock Vina docking results against MEK1 binding pocket.

| CID<br>number | SMILES                                                                                                                     | Docking<br>affinity<br>(kcal/mol<br>) |
|---------------|----------------------------------------------------------------------------------------------------------------------------|---------------------------------------|
| 12969679<br>3 | <chem>o1c(c(c(=O)c2C(=[C][C]=[C]c12)C(=O)/[C]=[C]/C1=[C][C]=C([C]=[C]1)O)O)C1=[C][C]=[C][C]=[C]1</chem>                    | -10.8                                 |
| 10813589      | <chem>O(C1=[C][C]=C2C(=O)[C]=C(OC2=[C]1)C1=[C][C]=[C][C]=[C]1)[C][C@@]1(OC(=O)C(=[C])[C]1)C1=[C][C]=C([C]=[C]1)O[C]</chem> | -10.6                                 |
| 10991656      | <chem>O1C2=[C][C]=C3C(=O)[C]=C(OC3=C2[C]=[C]C1([C])[C])C1=[C]C2=C([C]=[C]1)O[C]O2</chem>                                   | -10.5                                 |
| 10981007      | <chem>O1C2=C3C(=[C][C]=C2C(=O)[C][C]1C1=[C][C]=C2C(=[C]1)O[C]O2)OC([C])([C])[C]=[C]3</chem>                                | -10.5                                 |
| 10524567      | <chem>O1C2=C([C]=C3C(=[C]2)O[C]([C]C3=O)C2=[C]C3=C([C]=[C]2)OC([C][C]3)([C])[C])[C][C]1([C])[C]</chem>                     | -10.5                                 |
| 11796528      | <chem>C1(=[C][C]=C([C]=[C]1)O[C]C1=[C][C]=C2[C]=[C][C]=[C]C2=N1)C1=[C]C(=O)C2=C(O1)C(=[C][C]=[C]2)C(=O)O</chem>            | -10.4                                 |
| 10575055      | <chem>C1(=[C][C]=C([C]=[C]1)O[C]C1=[C][C]=C2[C]=[C][C]=[C]C2=N1)c1oc2c(c(=O)c1O)[C]=[C][C]=C2C(=O)O</chem>                 | -10.4                                 |
| 10094175<br>1 | <chem>O1C2=C(C(=C(C(=[C]2)O)C2=[C][C]=C([C]=[C]2)O[C])O)C(=O)[C][C]1C1=[C][C]=C(C(=[C]1)O)O[C]</chem>                      | -10.3                                 |
| 10094174<br>8 | <chem>O1C2=C(C(=C(C(=[C]2)O)C2=[C][C]=C([C]=[C]2)O[C])O)C(=O)[C][C]1C1=[C][C]=C([C]=[C]1)O</chem>                          | -10.3                                 |
| 23991884      | <chem>o1c([C])c(c(=O)c2C(=[C]C(=[C]c12)O[C]C1=[C][C]=C(O1)C(=O)O)O)C1=[C][C]=[C][C]=[C]1</chem>                            | -10.3                                 |
| 180439        | <chem>O1C(=[C]C(=O)C2=C1[C]=C(C(=[C]2)[C][C]=C([C])[C])O)C1=[C]C2=C([C]=[C]1)O[C]O2</chem>                                 | -10.3                                 |
| 10094338<br>0 | <chem>C1(=[C][C]=[C]C(=[C]1)C1=[C]C(=O)C2=[C][C]=[C][C]=C2O1)S(=O)(=O)NC1=[C][C]=C([C])[C]=[C]1</chem>                     | -10.2                                 |
| 53982668      | <chem>O1C2=[C][C]=[C][C]=C2C(=O)/C(=[C]\N[C]C2=[C][C]=C([C]=[C]2)C(=O)O)/[C]1C1=[C][C]=[C][C]=[C]1</chem>                  | -10.2                                 |
| 11247668      | <chem>O1C2=[C]C(=C(C(=C2C(=O)[C][C]1C1=[C][C]=C(C(=[C]1)O)O)O)[C]/[C]=C([C])/[C][C][C](C(=[C])[C])O)O</chem>               | -10.2                                 |
| 10338671      | <chem>C1(=[C][C]=C2C(=O)[C]=C(OC2=[C]1)C1=[C][C]=[C][C]=[C]1)O[C][C@]1(OC(=O)C(=[C])[C]1)[C]</chem>                        | -10.2                                 |
| 12985363<br>3 | <chem>o1c(c(c(=O)c2C(=[C][C]=[C]c12)C(=O)/[C]=[C]/C1=[C][C]=C(C(=[C]1)O)O)O)C1=[C][C]=[C][C]=[C]1</chem>                   | -10.1                                 |
| 42608050      | <chem>O1C([C])([C])[C]=[C]C2=C3C(=[C]C(=C12)[C]1[C]C(=O)C2=C([C]=C([C]=C2O1)O)O)[C]=[C]C([C])([C])O3</chem>                | -10.1                                 |
| 42608003      | <chem>O1c2c(c3c(C(=O)[C][C](O3)C3=[C][C]=C(C(=[C]3)O)O)c3OC([C])([C])[C][C]c23)[C][C]C1([C])[C]</chem>                     | -10.1                                 |
| 12019529      | <chem>O1C(=[C]C(=O)C2=C([C]=C([C]=C12)OC(=O)[C]C1=[C][C]=[C][C]=[C]1)O)C1=[C][C]=[C][C]=[C]1</chem>                        | -10.1                                 |
| 10098646<br>3 | <chem>O1C(=[C]C(=O)C2=C1[C]=C([C]=C2O)OC(=O)[C]/[C]=[C]/C1=[C][C]=[C][C]=[C]1)C1=[C][C]=[C][C]=[C]1</chem>                 | -10                                   |

|          |                                                                                                       |      |
|----------|-------------------------------------------------------------------------------------------------------|------|
| 85823044 | O1C(=[C]C(=O)C2=C([C]=[C][C]=C12)O[C]C1=[C][C]=[C][C]=[C]1)C1=[C][C]=C([C]=[C]1)[C]=O                 | -10  |
| 42607995 | O1c2c(c(c(c2[C][C](C(=[C])[C])O)O)[C][C]=C([C])[C])O)C(=O)[C][C]1C1=[C][C]=C(C(=[C]1)O)O              | -10  |
| 24133364 | o1c([C])c(c(=O)c2[C]=[C]C(=[C]c12)O[C]C1=[C][C]=C(O1)C(=O)O)C1=[C][C]=[C][C]=[C]1                     | -10  |
| 907980   | o1c([C])c(c(=O)c2=[C][C]=C([C]=c12)O[C]C1=[C][C]=[C][C]=[C]1)C1=[C][C]=[C][C]=[C]1                    | -10  |
| 10197413 | O1C2=C(C(=[C]C(=C2C(=O)[C][C]1C1=[C][C]=[C][C]=[C]1)O)O)[C]c1c(=O)oc(c([C])c1O)[C][C]                 | -9.9 |
| 5        |                                                                                                       |      |
| 73265448 | O1[C]=C(C(=O)C2=C1[C]=C([C]=C2O)O[C]C1=[C][C]=[C][C]=[C]1)C1=[C][C]=C([C]=[C]1)N(=O)=O                | -9.9 |
| 56649181 | C1(=C([C]=C2C(=C1O)C(=O)[C]=C(O2)C1=[C][C]=[C][C]=[C]1)O)O[C]C1=[C][C]=C(F)[C]=[C]1                   | -9.9 |
| 54721824 | O1C2=C(C(=[C]C(=C2C(=O)[C][C]1C1=[C][C]=[C][C]=[C]1)O)O)[C]c1c(=O)oc(c([C])c1O)[C][C]                 | -9.9 |
| 44382145 | C1(=[C]C2=C(C(=[C]1)O)C(=O)[C]=C(O2)C1=[C][C]=[C][C]=[C]1)OC(=O)C1=[C][C]=C(F)[C]=[C]1                | -9.9 |
| 23644952 | c1(c(c(=O)c2[C]=[C]C(=[C]c2o1)O[C]C1=N[C]=[C][C]=[C]1)C1=[C][C]=[C][C]=[C]1)S[C]C1=[C][C]=N[C]=[C]1   | -9.9 |
| 15469998 | O(C1=[C][C]=C2C(=O)[C][C](OC2=[C]1)C1=[C][C]=[C][C]=[C]1)[C]1O[C]([C]([C]1O)O)O)C(=O)O                | -9.8 |
| 5        |                                                                                                       |      |
| 10168522 | O1C2=[C]C=C(C(=C2C(=O)[C]([C]1C1=[C][C]=C([C]=[C]1)O)O)O)[C]C1=[C][C]=C([C]=[C]1)O)O                  | -9.8 |
| 2        |                                                                                                       |      |
| 10124538 | C1(=c2c(=C([C]=C1O)O)c(=O)c(c(o2)C1=[C][C]=C([C]=[C]1)O[C])O)O[C][C]1O[C]1C1=[C]C=C([C]=[C]1)O)O      | -9.8 |
| 7        |                                                                                                       |      |
| 10094174 | O1C2=[C]C=C(C(=C2C(=O)[C][C]1C1=[C][C]=C([C]=[C]1)O)O)C1=[C][C]=[C][C]=[C]1)O                         | -9.8 |
| 7        |                                                                                                       |      |
| 44382144 | O1C(=[C]C(=O)C2=C1[C]=C([C]=C2O)OC(=O)C1=[C][C]=C([C])[C]=[C]1)C1=[C][C]=[C][C]=[C]1                  | -9.8 |
| 10551087 | O1C2=C3C(=[C]C(=C2[C][C](C1([C])[C])O)[C]1[C]C(=O)C2=C([C]=C([C]=C2O1)O)O)[C][C]C([C])([C])O3         | -9.8 |
| 1522807  | O1[C]=C(C(=O)C2=[C][C]=C([C]=C12)O[C]C1=[C][C]=C([C]=[C]1)N(=O)=O)C1=[C][C]=[C][C]=[C]1               | -9.8 |
| 491718   | O1c2c([C])c(c(c(c2C(=O)[C][C]1C1=[C][C]=C([C]=[C]1)O)O)[C][C]=C([C])[C])O                             | -9.8 |
| 15469959 | O([C]1O[C]([C]([C]([C]1O)O)O)C(=O)O)C1=[C][C]=[C][C]=C1C1=[C]C(=O)C2=[C][C]=[C][C]=C2O1               | -9.7 |
| 8        |                                                                                                       |      |
| 76333661 | O(C1=[C][C]=C2C(=O)[C]=C(OC2=[C]1)C1=[C][C]=[C][C]=[C]1)[C]1O[C]([C]([C]([C]1O)O)O)[C]C(=O)[C]        | -9.7 |
| 42607799 | O1C2=C(C(=[C][C]=C2C(=O)[C][C]1C1=[C][C]=[C][C]=[C]1)O[C][C]=C([C])[C])/[C]=[C]/C([C])([C])O          | -9.7 |
| 24861960 | O1C2=[C]C=C(C(=C2C(=O)[C][C]1C1=[C][C]=C(C(=[C]1)O[C])O)O)[C]/[C]=C([C])/[C]/[C]=[C]/C([C])([C])O)O   | -9.7 |
| 23644933 | o1c2=[C]C(=[C][C]=c2c(=O)c(c1N1[C]=N[C]=[C]1)C1=[C][C]=[C][C]=[C]1)O[C]C1=[C][C]=[C][C]=[C]1          | -9.7 |
| 19835337 | O(C1=[C]C2=C([C]=[C]1)C(=O)[C]=C(O2)C1=[C][C]=[C][C]=[C]1)[C][C](O)[C]N[C][C][C][C]C1=[C]N[C][C]=[C]1 | -9.7 |

|               |                                                                                                              |      |
|---------------|--------------------------------------------------------------------------------------------------------------|------|
| 16737249      | O1C2=C(C(=[C]C(=[C]2)O)O)C(=O)[C][C]1C1=[C]C2=C([C]=[C]1)OC([C]=[C]2)([C])[C]                                | -9.7 |
| 14304997      | C(=O)(N[C][C][C][C]N1[C][C]N([C][C]1)C1=N[C]=[C][C]=[C]1)c1c(=O)c2c(oc1C1=[C][C]=[C][C]=[C]1)[C]=[C][C]=[C]2 | -9.7 |
| 12109666      | O1C2=C3C(=[C][C]=C2C(=O)[C][C]1C1=[C][C]=C([C]=[C]1)O[C])OC([C])([C])[C]=[C]3                                | -9.7 |
| 11742974      | c1(c2c([C]=[C]C([C])([C])O2)c(c2C(=O)[C][C](Oc12)C1=[C][C]=C([C]=[C]1)O)O)[C][C]1OC1([C])[C]                 | -9.7 |
| 11358607      | O1C2=C(C3=C([C]=[C]2)C(=O)[C]=C(O3)C2=[C][C]=[C][C]=[C]2)[C]=[C]C1([C])[C]                                   | -9.7 |
| 1760386       | O1[C]=C(C(=O)C2=[C][C]=C([C]=C12)O[C]C1=[C][C]=[C][C]=[C]1)C1=[C][C]=C([C]=[C]1)O[C]                         | -9.7 |
| 10193866<br>9 | C1(=[C][C]=C([C]=[C]1)c1c(c(=O)c2[C]=[C][C]=[C]c2o1)O)N1O[C][C]O[C][C]O[C][C]O[C]O[C]1                       | -9.6 |
| 10123824<br>1 | C1(=[C]C2=C(C(=O)C(=[C]O2)C2=[C][C]=C([C]=[C]2)O)[C]=C1C(=O)[C])O[C]1O[C]([C]([C]([C]1O)O)O)[C]O             | -9.6 |
| 44559902      | O1C2=[C]C=C(C(=C2C(=O)[C]([C]1C1=[C][C]=C([C]=[C]1)O)O)O)[C]C1=[C][C]=C([C]=[C]1)O)O                         | -9.6 |
| 15383190      | O1C2=[C]C(=C3C(=O)[C]=C(OC3=C2[C]=[C]C1([C])[C])C1=[C][C]=[C][C]=[C]1)O                                      | -9.6 |
| 11582389      | C1(=[C]C2=C([C]=[C]1)C(=O)[C]=C(O2)C1=[C][C]=[C][C]=[C]1)O[C]1O[C]([C]([C]([C]1O)O)O)[C]O                    | -9.6 |
| 11395168      | O1C(=[C]C(=O)C2=C1[C]=C([C]=C2O)O[C]C1=[C][C]=[C][C]=[C]1)C1=[C]C(=C([C]=[C]1)O[C])O                         | -9.6 |
| 11314387      | O1C(=[C]C(=O)C2=C(C(=C([C]=C12)O)O)[C]C1=[C][C]=[C][C]=[C]1)O)C1=[C][C]=[C][C]=[C]1                          | -9.6 |
| 10449654      | O1C2=C(C(=C3C(=[C]2)OC(=[C]C3=O)C2=[C][C]=C([C]=[C]2)O)O)[C]=[C]C1([C])[C]                                   | -9.6 |
| 563997        | O1[C]=C(C(=O)C2=[C][C]=C([C]=C12)O[C]C1=[C][C]=[C][C]=[C]1)C1=[C][C]=[C][C]=[C]1                             | -9.6 |
| 440215        | C1(=[C][C]=C2C(=O)C(=[C]OC2=[C]1)C1=[C][C]=[C][C]=[C]1)O[C]1O[C]([C]([C]([C]1O)O)O)[C]O                      | -9.6 |
| 15469955<br>2 | O([C]1O[C]([C]([C]([C]1O)O)O)C(=O)O)C1=[C][C]=[C]C(=[C]1)C1=[C]C(=O)C2=[C][C]=[C][C]=C2O1                    | -9.5 |
| 12988126<br>9 | o1c2=[C][C]=C([C]=c2c(=O)c(c1C1=[C]C2=C([C]=[C]1)O[C]O2)O)C(=O)O                                             | -9.5 |
| 12986727<br>7 | O1C(=[C]C(=C2[C]=[C][C]=[C][C]12)[N]NC(=O)C1=[C][C]=[C][C]=[C]1)C1=[C][C]=[C][C]=[C]1                        | -9.5 |
| 12983451<br>4 | O1C2=[C]C(=[C]C(=C2C(=O)[C][C]1C1=[C][C]=C([C]=[C]1)OC(=O)[C])O)O[C]C1=[C][C]=[C][C]=[C]1                    | -9.5 |
| 12979132<br>8 | C1(=[C]c2c([C]=[C]1)c(=O)c(c(o2)C(=O)O)C1=[C][C]=[C][C]=[C]1)O[C]c1sc2[C]=[C][C]=[C]c2n1                     | -9.5 |
| 12236641<br>1 | C1(=[C][C]=C([C]=[C]1)C1=[C]C(=O)C2=[C][C]=[C][C]=C2O1)OS([O])([O])C(F)(F)F                                  | -9.5 |

|               |                                                                                                          |      |
|---------------|----------------------------------------------------------------------------------------------------------|------|
| 10257793<br>0 | C1(=[C]C(=C2C(=O)[C]=C(OC2=[C]1)C1=[C][C]=C([C]=[C]1)O)O)OS([O])([O])C1=[C][C]=C([C])C=[C]1              | -9.5 |
| 54490901      | O1C2=[C][C]=[C][C]=C2C(=O)/C(=[C]\C2=[C][C]=[C]C(=[C]2)NC(=O)[C])/[C]1C1=[C][C]=[C][C]=[C]1              | -9.5 |
| 53249095      | O1C2=[C]C3=C([C]=[C]C([C])([C])O3)C(=C2C(=O)[C][C]1C1=C([C]=C([C]=[C]1)O)O)O                             | -9.5 |
| 44584124      | O1C2=[C]C3=C([C]=[C]C([C])([C])O3)C(=C2C(=O)[C][C]1C1=C([C]=[C][C]=[C]1)O)O                              | -9.5 |
| 25070110      | O1C2=[C]C(=[C]C(=C2C(=O)[C][C]1C1=[C][C]=C([C]=[C]1)O)O)O[C]C1=[C][C]=[C][C]=[C]1                        | -9.5 |
| 23644934      | o1c2=[C]C(=[C][C]=c2c(=O)c(c1N1[C]=N[C]=[C]1)C1=[C][C]=C([C]=[C]1)O[C])O[C]C1=[C][C]=[C][C]=[C]1         | -9.5 |
| 15939984      | o1c2=[C][C]=C([C])[C]=c2c(=O)c(c1C1=[C][C]=C2C(=[C]1)O[C]O2)O                                            | -9.5 |
| 15342845      | o1c(c(c(=O)c2=C([C]=C([C]=c12)O)OC(=O)C1=[C][C]=[C][C]=[C]1)O[C])C1=[C][C]=[C][C]=[C]1                   | -9.5 |
| 14626316      | O(C1=[C][C]=C2C(=O)[C]=C(OC2=[C]1)C1=[C][C]=[C][C]=[C]1)[C][C](O)[C]N[C][C]C1=[C][C]=C([C]=[C]1)O        | -9.5 |
| 14408549      | [C](OC1=[C][C]=C2C(=O)[C]=C(OC2=[C]1)C1=[C][C]=[C][C]=[C]1)[C](O)[C]N[C][C]C1=[C][C]=C(C(=[C]1)O[C])O[C] | -9.5 |
| 12071400      | C1(=[C]C(=[C]c2oc(c(c(=O)c12)O)C1=[C]C(=C([C]=[C]1)O[C])O[C])O[C])OS([O])([O])C1=[C][C]=C([C]=[C]1)[C]   | -9.5 |
| 11718263      | C1(=[C][C]=C2C(=[C]1)C(=O)[C]=C(O2)C1=[C]C(=C([C]=[C]1)O)O)O[C][C](O)[C]NC([C])([C])[C]                  | -9.5 |
| 625630        | O1C(=[C]C(=O)C2=C1C(=[C]C1=C2[C]=[C][C]=[C]1)O)C1=[C][C]=[C][C]=[C]1                                     | -9.5 |
| 440195        | C1(=[C]C2=C([C]=[C]1)C(=O)[C][C](O2)C1=[C][C]=[C][C]=[C]1)O[C]1O[C]([C]([C]([C]1O)O)O)[C]O               | -9.5 |
| 10220349<br>6 | O1C(=[C]C(=O)C2=C([C]=C([C]=C12)O[C]O[C])O[C]O[C])C1=[C][C]=C([C]=[C]1)O[C]C1=[C][C]=[C][C]=[C]1         | -9.4 |
| 10188772<br>1 | C1(=C([C]=C(C2=C1OC(=[C]C2=O)C1=[C][C]=C([C]=[C]1)O)O)O[C])([C]1O[C]([C])[C](C(=O)[C]1)O                 | -9.4 |
| 10139688<br>8 | O1c2c3C(=O)C(=[C]Oc3c(c(c2[C]=[C]C1([C])([C])O)[C][C](C([C])([C])O)O)C1=[C][C]=C([C]=[C]1)O              | -9.4 |
| 69941512      | C1(=[C]C2=C([C]=[C]1)OC(=[C]C2=O)C1=[C][C]=[C][C]=[C]1)O[C][C][C]1OC(=O)C(=C1O)O                         | -9.4 |
| 56589538      | C1(=C(C(=C2C(=O)[C]=C(OC2=[C]1)C1=[C][C]=[C][C]=[C]1)O)O)O[C]C1=[C][C]=C(F)[C]=[C]1                      | -9.4 |
| 42607962      | O1C2=C(C(=[C]C3=C2[C]=[C]C(O3)([C])([C])O)C(=O)[C][C]1C1=[C][C]=C([C]=[C]1)O[C]                          | -9.4 |
| 15342843      | o1c(c(c(=O)c2C(=[C]C(=[C]c12)OC(=O)C1=[C][C]=[C][C]=[C]1)O)O[C])C1=[C][C]=[C][C]=[C]1                    | -9.4 |
| 15108704      | O1C(=[C]C(=O)C2=C(C(=C([C]=C12)O[C]C1=[C][C]=[C][C]=[C]1)O)O)C1=[C][C]=C(C(=[C]1)O)O                     | -9.4 |
| 14187087      | O1C2=C(C(=C3C(=[C]2)OC([C]=[C]3)([C])([C])O)C(=O)[C][C]1C1=[C][C]=C([C]=[C]1)O                           | -9.4 |
| 11247278      | O1C2=C(C(=[C]C(=C2[C][C]=C([C])([C])OC(=O)[C])O)C(=O)[C][C]1C1=[C][C]=C([C]=[C]1)OC(=O)[C]               | -9.4 |
| 5466794       | C1(=[C]C(=O)C2=C(C(=C([C]=C2O)O)[C]2[C][C]N([C])[C][C]2O)O1)C1=C(Cl)[C]=[C][C]=[C]1                      | -9.4 |

|                             |                                                                                                        |      |
|-----------------------------|--------------------------------------------------------------------------------------------------------|------|
| <b>629905</b>               | C1(=[C][C]=C(C(=[C]1)O[C]C1=[C][C]=[C][C]=[C]1)O[C])c1oc2=[C]C(=[C][C]=c2c(=O)c1O[C])O[C]              | -9.4 |
| <b>15469991</b><br><b>9</b> | O([C]1O[C]([C]([C]([C]1O)O)O)C(=O)O)C1=[C][C]=C([C]=[C]1)C1=[C]C(=O)C2=C([C]=[C][C]=[C]2)O1            | -9.3 |
| <b>13175137</b><br><b>2</b> | O1C2=C3[C]=[C]C([C])([C])OC3=[C][C]=C2C(=O)[C]([C]1C1=[C][C]=C(C(=[C]1)[C][C]=C([C])([C])O)O           | -9.3 |
| <b>10098646</b><br><b>4</b> | O1C(=[C]C(=O)C2=C1[C]=C([C]=C2O)OC(=O)[C]/[C]=[C]/C1=[C][C]=C([C]=[C]1)O[C])C1=[C][C]=[C][C]=[C]1      | -9.3 |
| <b>69567244</b>             | O1C(=[C]C(=O)C2=C1[C]=C([C]=C2O)O[C]C1=[C][C]=[C][C]=[C]1)C1=[C][C]=C([C]=[C]1)O                       | -9.3 |
| <b>14626328</b>             | C1(=[C][C]=C2C(=O)[C]=C(OC2=[C]1)C1=[C][C]=[C][C]=[C]1)O[C][C](O)[C][C][C]O[C]1O[C][C][C]1             | -9.3 |
| <b>14304994</b>             | c1(c(=O)c2[C]=[C][C]=[C]c2oc1C1=[C][C]=[C][C]=[C]1)C(=O)N1[C][C]N([C][C]1)[C]C1=[C][C]=[C][C]=[C]1     | -9.3 |
| <b>12019528</b>             | O1C(=[C]C(=O)C2=C([C]=C([C]=C12)OC(=O)C1=C([C]=[C][C]=[C]1)OC(=O)[C])O)C1=[C][C]=[C][C]=[C]1           | -9.3 |
| <b>11995581</b>             | C1(=[C]C=C(C(=[C]1)[C][C]=C([C])([C])O[C])/[C]=[C]/C([C])([C])O)[C]1OC2=[C]C(=[C][C]=C2C(=O)[C]1)O     | -9.3 |
| <b>11132477</b>             | o1c2=[C][C]=[C][C]=c2c(=O)c(c1C1=[C][C]=[C][C]=[C]1)[C](C1=[C][C]=C([C]=[C]1)N(=O)=O)O                 | -9.3 |
| <b>637111</b>               | O1c2c(c(c3[C]=[C]C([C])([C])Oc3c2[C][C]=C([C])([C])O)C(=O)[C]([C]1C1=C([C]=[C][C]=[C]1)O)O             | -9.3 |
| <b>636525</b>               | O1C2=C(C(=[C]C3=C2[C]=[C]C(O3)([C])([C])O)C(=O)[C][C]1C1=[C]C(=C([C]=[C]1)O[C])O                       | -9.3 |
| <b>563887</b>               | C1(=[C][C]=C(C(=[C]1)O[C])O[C]C1=[C][C]=[C][C]=[C]1)c1oc2[C]=[C][C]=[C]c2c(=O)c1O[C]                   | -9.3 |
| <b>49700</b>                | C1(=c2c(=[C][C]=C1O[C])c(=O)c([C])c(o2)C1=[C][C]=[C][C]=[C]1)[C]N1[C][C]O[C][C]1                       | -9.3 |
| <b>13735036</b><br><b>9</b> | C1=[C][C]=[C]C2=C1O[C]=C(C2=O)C1=[C][C]=[C][C]=[C]1)[C]1O[C]([C]([C]([C]1O)O)O)[C]O                    | -9.2 |
| <b>12985615</b><br><b>1</b> | O(c1c(=O)c2=[C][C]=[C][C]=c2oc1C1=[C][C]=[C][C]=[C]1)C(=O)[C]1O[C]([C]([C]([C]1O)O)O)O                 | -9.2 |
| <b>10188772</b><br><b>0</b> | C1(=C([C]=C(C2=C1OC(=[C]C2=O)C1=[C][C]=C([C]=[C]1)O)O)O)[C]1O[C]([C])([C])([C]1)O)O                    | -9.2 |
| <b>10188771</b><br><b>9</b> | C1(=C([C]=C(C2=C1OC(=[C]C2=O)C1=[C][C]=C([C]=[C]1)O)O)O)[C]1O[C]([C])([C])([C]1)O)O                    | -9.2 |
| <b>10142913</b><br><b>2</b> | C1(=[C]C=C(C(=[C]1)/[C]=[C]/C([C])([C])O)O[C])([C][C]=C([C])([C]))[C]1OC2=C([C]=[C]C(=[C]2)O)C(=O)[C]1 | -9.2 |
| <b>10121493</b><br><b>9</b> | C1(=[C][C]=C([C]=[C]1)c1c(c(=O)c2[C]=[C][C]=[C]c2o1)O)N1[C][C]N([C][C]1)C1=C([C]N[C]=[C]1)S([O])([O])O | -9.2 |
| <b>52951514</b>             | C1(=[C]C=C(C([C]=[C]1)O[C][C](C([C])([C])O)O)O)[C]C1=[C]OC2=[C]C3=C([C]=C2C1=O)[C]=[C]C(O3)([C])[C]    | -9.2 |

|          |                                                                                                          |      |
|----------|----------------------------------------------------------------------------------------------------------|------|
| 52951513 | O1C2=[C]C3=C(C(=O)C(=[C]O3)C3=[C][C]=C(C(=[C]3)O[C])O[C][C](C([C])([C])O)O)C(=C2[C]=[C]C1([C])([C])O[C]) | -9.2 |
| 42607996 | O1C2=C(C(=[C]C(=C2C(=O)[C][C]1C1=[C]C(=C([C]=[C]1)O)O)O)O)[C]/[C]=C(\[C])/[C]OC(=O)[C]                   | -9.2 |
| 25030431 | o1c(c(c(=O)c2=[C]C(=[C][C]=c12)NC(=O)[C][C]C(=O)O)O)C1=[C]C(=C([C]=[C]1)O)O                              | -9.2 |
| 24960482 | C1(=[C]C2=C([C]=[C]1)C(=O)[C]=C(O2)C1=[C]C(=[C]C(=[C]1)O)O)O[C][C](O)[C]N[C]([C])[C]                     | -9.2 |
| 15308126 | C1(=c2c(=[C]C(=C1O)O[C])oc(c(c2=O)O)C1=[C][C]=C([C]=[C]1)O[C])OS([O])([O])C1=[C][C]=C([C])([C]=[C]1      | -9.2 |
| 14445197 | C1(=C([C]=C2C(=C1O)C(=O)[C]=C(O2)C1=[C][C]=C(C(=[C]1)O)O[C])O)[C]1O[C]([C])([C]([C]1)O)O                 | -9.2 |
| 12043067 | C1(=[C]C(=O)C2=C([C]=C(C(=C2O1)[C]1C(=O)[C]N([C])[C][C]1)O)O)C1=[C][C]=[C][C]=C1Cl                       | -9.2 |
| 11597157 | C1(=[C]C2=C([C]=[C]1)C(=O)[C]=C(O2)C1=[C][C]=C([C]=[C]1)O)O[C]1O[C]([C]([C]([C]1O)O)O[C])[C]O            | -9.2 |
| 11545770 | C1(=[C][C]=C2C(=O)[C]=C(OC2=[C]1)C1=[C]C(=[C]C(=[C]1)O)O)O[C][C](O)[C]NC([C])([C])[C]                    | -9.2 |
| 10741771 | O1C2=C(C(=C([C]=C2[C][C](C1([C])([C])O)[C]1[C]C(=O)C2=C([C]=C([C]=C2O)O)O1)[C][C]=C([C])([C])O           | -9.2 |
| 10291777 | O1C2=C(C3=C([C]=[C]2)C(=O)[C][C](O3)C2=C([C]=C([C]=[C]2)O)O)[C][C]1C([C])([C])O                          | -9.2 |
| 5481228  | O1[C]=C(C(=O)C2=C([C]=C([C]=C12)O)O)C1=C([C]=C(C(=[C]1)[C][C]=C([C])([C])O)O                             | -9.2 |
| 5378307  | O1C(=[C]C(=O)C2=C1[C]=[C]C1=C2[C]=C([C]=[C]1)O)C1=[C][C]=[C][C]=[C]1                                     | -9.2 |
| 564150   | o1c(c(c(=O)c2=[C][C]=C([C]=c12)O[C]C1=[C][C]=[C][C]=[C]1)O[C])C1=[C]C(=C([C]=[C]1)O[C])O[C]              | -9.2 |
| 511789   | O1C2=C(C(=[C][C]=C2C(=O)[C][C]1C1=[C][C]=C([C]=[C]1)O)O[C])[C][C]=C([C])([C]                             | -9.2 |
| 177731   | O1[C]=C(C(=O)C2=C1[C]=C([C]=[C]2)O[C][C]=C([C])([C])C1=[C][C]=C([C]=[C]1)O[C]                            | -9.2 |
| 11790    | O1C(=[C]C(=O)C2=[C][C]=C3[C]=[C][C]=[C]C3=C12)C1=[C][C]=[C][C]=[C]1                                      | -9.2 |
| 12983451 | O1C2=C(C(=[C]C(=[C]2)O[C]C2=[C][C]=[C][C]=[C]2)O[C])C(=O)[C][C]1C1=[C][C]=C([C]=[C]1)OC(=O)[C]           | -9.1 |
| 7        |                                                                                                          |      |
| 12982241 | O1C(=[C]C(=O)C2=C1C(=[C]C(=[C]2)OC(=O)[C])N)C1=[C][C]=C([C]=[C]1)OC(=O)[C]                               | -9.1 |
| 3        |                                                                                                          |      |
| 12971612 | c1(c(=O)c2=[C][C]=[C][C]=c2oc1C1=[C][C]=[C][C]=[C]1)C(=O)[C]1O[C]([C]([C]([C]1O)O)O)O                    | -9.1 |
| 0        |                                                                                                          |      |
| 12970394 | o1c(c(c(=O)c2C(=[C][C]=[C]c12)C(=O)C1=[C]C(=C(C(=[C]1)O)O)O)O)C1=[C][C]=[C][C]=[C]1                      | -9.1 |
| 0        |                                                                                                          |      |
| 10149923 | C1(=[C]C(=C(C(=[C]1)O[C])O[C]([C]O)[C](C1=[C][C]=C([C]=[C]1)O)O)O[C])[C]1OC2=[C]C(=[C]C(=C2C(=O)[C]1)O)O | -9.1 |
| 4        |                                                                                                          |      |
| 10139688 | O1c2c3C(=O)C(=[C]Oc3c(c(c2[C][C]1C([C])([C])O)O)[C][C]=C([C])([C])C1=[C][C]=C([C]=[C]1)O                 | -9.1 |
| 7        |                                                                                                          |      |
| 95400994 | O1C2=[C][C]=C3[C]=[C][C]=[C]C3=C2C(=O)[C][C]1C1=[C][C]=[C][C]=[C]1                                       | -9.1 |

|          |                                                                                                |      |
|----------|------------------------------------------------------------------------------------------------|------|
| 67984060 | o1c(c(c(=O)c2C(=[C]C(=[C]c12)O[C]C1=[C][C]=[C][C]=[C]1)O)O)C1=[C][C]=C(C(=[C]1)O)O             | -9.1 |
| 46881227 | C1(=[C]C2=C(C(=[C]1)O)C(=O)[C][C](O2)C1=[C][C]=[C][C]=[C]1)O[C]1O[C]([C]([C]([C]1O)O)O)[C]O    | -9.1 |
| 42608102 | O1c2c3[C]=[C]Oc3c(c(c2C(=O)[C][C]1C1=[C][C]=C2C(=[C]1)O[C]O2)O)O[C]                            | -9.1 |
| 42608049 | O1C2=[C]C(=C3C(=O)[C][C](OC3=C2[C][C]C1([C])[C])C1=C([C]=C([C]=[C]1)O)O)O                      | -9.1 |
| 24866261 | C1(=[C]C(=C2C(=O)[C]=C(OC2=[C]1)C1=[C][C]=[C][C]=[C]1)O)O[C]1O[C]([C]([C]([C]1O)O)O)[C]O       | -9.1 |
| 21576252 | O1[C]=C(C(=O)C2=C([C]=C([C]=C12)O[C][C]=C([C])[C])O)C1=[C][C]=C([C]=C1O)O                      | -9.1 |
| 15118758 | C1(=[C][C]=C2C(=O)[C]=C(OC2=[C]1)C1=C([C]=[C][C]=[C]1)O)O[C]1O[C]([C]([C]([C]1O)O)O)[C]O       | -9.1 |
| 15108702 | O1C(=[C]C(=O)C2=C(C(=C([C]=C12)O[C]C1=[C][C]=[C][C]=[C]1)O)O)C1=[C][C]=[C][C]=[C]1             | -9.1 |
| 12428921 | O1C2=[C][C]=[C][C]=C2C(=O)/C(=[C]\C2=[C][C]=[C]C(=[C]2)O)/[C]1C1=[C][C]=[C][C]=[C]1            | -9.1 |
| 11618226 | C1(=[C][C]=C2C(=O)[C]=C(OC2=[C]1)C1=[C][C]=C(C(=[C]1)O)O)O[C][C](O)[C]NC([C])([C])[C]          | -9.1 |
| 11222065 | o1c2=[C][C]=[C][C]=c2c(=O)c(c1C1=[C][C]=[C][C]=[C]1)[C](C1=[C][C]=C([C]=[C]1)O[C])O            | -9.1 |
| 11077963 | o1c2=[C][C]=[C][C]=c2c(=O)c(c1C1=[C][C]=[C][C]=[C]1)[C](C1=[C][C]=[C][C]=[C]1)O                | -9.1 |
| 11048450 | O1C([C])([C])[C]=[C]c2c(c3C(=O)[C][C](Oc3c(c12)[C][C](C([C])([C])O)O)C1=[C][C]=C([C]=[C]1)O)O  | -9.1 |
| 10970624 | O1c2c(c3c([C]=[C]C([C])([C])O3)c(c2C(=O)[C][C]1C1=[C][C]=C([C]=[C]1)O)O)[C]O                   | -9.1 |
| 5494866  | O1[C]=C(C(=O)C2=C([C]=C([C]=C12)O)O)C1=[C][C]=C(C(=[C]1)[C][C]=C([C])[C])O                     | -9.1 |
| 5316782  | O1C2=C(C3=C(C(=[C]2)O)C(=O)[C][C](O3)C2=[C][C]=C([C]=[C]2)O)[C][C]1C([C])([C])O                | -9.1 |
| 3085261  | C1(=[C]C2=C([C]=[C]1)C(=O)C(=[C]O2)C1=[C]C2=C([C]=[C]1)O[C]O2)O[C]1O[C]([C]([C]([C]1O)O)O)[C]O | -9.1 |
| 13959387 | O1C(=[C]C(=O)C2=C1C(=[C]C(=[C]2)[C]C(=O)[C])O[C])C1=[C][C]=C([C]=[C]1)O[C]                     | -9   |
| 7        |                                                                                                |      |
| 12984781 | O1C(=[C]C(=O)C2=C1[C]=C(C(=C2O)[C][C]C(=[C])([C])O)C1=C([C]=C([C]=[C]1)O)O                     | -9   |
| 7        |                                                                                                |      |
| 12973586 | O1C2=C([C]=[C][C]=C2C(=O)[C][C]1C1=[C][C]=[C][C]=[C]1)/[C]=[C]/C(=[C])[C]                      | -9   |
| 9        |                                                                                                |      |
| 10200538 | C1(=[C]C(=O)C2=C(C(=C([C]=C2O[C])O[C])C2=[C][C]N([C])[C][C]2)O1)C1=C(Cl)[C]=C([C]=[C]1)Cl      | -9   |
| 2        |                                                                                                |      |
| 10199990 | C1(=[C]OC2=[C]C(=C(C(=C2C1=O)O)[C][C]C([C])([C])O)O)C1=[C][C]=C2OC([C]=[C]C2=C1O)([C])[C]      | -9   |
| 2        |                                                                                                |      |
| 10165084 | O1C2=[C][C]=[C][C]=C2C(=O)/C(=[C]\C2=[C][C]=[C]C(=[C]2)N(=O)=O)/[C]1C1=[C][C]=[C][C]=[C]1      | -9   |
| 3        |                                                                                                |      |



|               |                                                                                                        |      |
|---------------|--------------------------------------------------------------------------------------------------------|------|
| 10151666<br>5 | O1C2=[C]C(=[C]C(=C2C(=O)[C][C]1C1=[C][C]=C([C]=[C]1)OC(=O)[C])O)O[C][C]=C([C])[C]                      | -9   |
| 74333987      | O1C2=C(C(=C(C(=[C]2)O)[C][C]=C([C])[C])O)C(=O)[C]([C]1C1=[C]C(=C(C(=[C]1)O[C])O)O)O                    | -9   |
| 58089059      | o1c(c(c(=O)c2[C]=C([C]=[C]c12)NC(=O)[C][C]C(=O)O)O)C1=[C][C]=C([C]=[C]1)O                              | -9   |
| 54450648      | O1C2=[C][C]=[C][C]=C2C(=O)/C(=[C]\NC2=C([C]=[C][C]=[C]2)O)/[C]1C1=[C][C]=[C][C]=[C]1                   | -9   |
| 53904139      | C1(=[C][C]=[C]C(=[C]1)C1=[C]C(=O)C2=C([C]=[C][C]=[C]2)O1)S(=O)(=O)N                                    | -9   |
| 49788613      | o1c(c(c(=O)c2=C([C]=C(C(=c12)O[C])O[C][C]=C([C])[C])O)O)C1=[C]C2=C([C]=[C]1)O[C]O2                     | -9   |
| 46850208      | C1(=C([C]=C2C(=C1O)C(=O)[C]=C(O2)C1=[C]C(=C([C]=[C]1)O)O[C])O)[C]/[C]=C(\[C])/[C][C][C](C([C])([C])O)O | -9   |
| 44257869      | O1C2=[C]C3=C(C(=O)[C]=C(O3)C3=[C][C]=C([C]=[C]3)O)C(=C2[C][C](C1([C])[C])O)O                           | -9   |
| 42607867      | C1(=[C]C2=C(C(=[C]1)O)C(=O)[C][C](O2)C1=[C][C]=[C][C]=[C]1)O[C][C]1OC1([C])[C]                         | -9   |
| 19358579      | O1C(=[C]C(=O)C2=C1[C]=C([C]=C2O[C])O[C]C1=[C][C]=[C][C]=[C]1)C1=[C][C]=C(C(=[C]1)O[C])O[C]             | -9   |
| 15389725      | C1(=[C]C(=O)C2=[C][C]=[C][C]=C2O1)C1=[C][C]=[C]C(=[C]1)S(=O)(=O)Cl                                     | -9   |
| 14735885      | C1(=[C]C(=O)C2=[C][C]=[C][C]=C2O1)C1=[C][C]=C([C]=[C]1)C(F)(F)F                                        | -9   |
| 12753176      | [C]1(C(=[C])C(=O)C2=[C][C]=[C][C]=C2O1)C1=C(Cl)[C]=C([C]=[C]1)Cl                                       | -9   |
| 12043064      | C1(=[C]C(=O)C2=C([C]=C(C(=C2O1)[C]1[C]N([C])[C][C][C]1O)O)O)C1=[C][C]=[C][C]=C1Cl                      | -9   |
| 12043063      | C1(=[C]C(=O)C2=C([C]=C(C(=C2O1)[C]1[C]N([C])[C][C][C]1O)O[C])O[C])C1=[C][C]=[C][C]=C1Cl                | -9   |
| 10814209      | C1(=C([C]=c2c(=C1O)c(=O)c(c(o2)C1=[C][C]=C([C]=[C]1)O[C])O)O)OS([O])([O])C1=[C][C]=C([C]=[C]1)[C]      | -9   |
| 5320053       | O1[C]=C(C(=O)C2=[C][C]=C([C]=C12)O)C1=[C][C]=C(C(=[C]1)[C][C]=C([C])[C])O                              | -9   |
| 3870517       | O1C2=C(C(=[C]C(=[C]2)OC(=O)[C])O)C(=O)[C][C]1C1=[C][C]=C([C]=[C]1)OC(=O)[C]                            | -9   |
| 3070243       | c1(c([C])c(=O)c2[C]=[C]C(=C(c2o1)[C]N1[C][C][C][C]1)O[C])C1=[C][C]=C(F)[C]=[C]1                        | -9   |
| 3070242       | c1(c([C])c(=O)c2[C]=[C]C(=C(c2o1)[C]N1[C][C][C][C]1)O[C])C1=[C][C]=C(F)[C]=[C]1                        | -9   |
| 491719        | O1c2c(c(c([C])c(c2C(=O)[C][C]1C1=[C][C]=C([C]=[C]1)O)O)O)[C][C]=C([C])[C]                              | -9   |
| 480763        | O1C2=[C]C(=C(C(=C2C(=O)[C][C]1C1=[C][C]=[C][C]=[C]1)O)[C][C]=C([C])[C])O                               | -9   |
| 399491        | O1C(=[C]C(=O)C2=C1[C]=C(C(=C2O)[C][C]=C([C])[C])O)C1=C([C]=C([C]=[C]1)O)O                              | -9   |
| 2361          | O1C(=[C]C(=O)C2=C1[C]=[C]C1=C2[C]=[C][C]=[C]1)C1=[C][C]=[C][C]=[C]1                                    | -9   |
| 14594569<br>3 | O1[C]([C]([C]([C]([C]([C@]1(c1c(=O)c2=[C][C]=[C][C]=c2oc1C1=[C][C]=[C][C]=[C]1)O)O)O)[C]O              | -8.9 |
| 12988148<br>7 | O1C2=[C][C]=C([C]=C2C(=O)[C]=C1C1=[C][C]=[C][C]=C1C(=O)O)C(=O)O                                        | -8.9 |

|               |                                                                                                              |      |
|---------------|--------------------------------------------------------------------------------------------------------------|------|
| 12983453<br>9 | O1C2=C(C(=[C]C(=[C]2)O[C]C2=[C][C]=[C][C]=[C]2)O[C])C(=O)[C][C]1C1=[C][C]=C([C]=[C]1)O                       | -8.9 |
| 12971430<br>2 | O1C2=[C][C]=[C][C]=C2C(=O)[C]([C@@]1(C1=[C][C]=[C][C]=[C]1)[C]C1=[C][C]=[C][C]=[C]1)O                        | -8.9 |
| 10232161<br>1 | O1[C]=C(C(=O)C2=C1[C]=C([C]=C2O)C1=[C][C]2C(=[C][C]=[C]O2)C(=[C]1)O)C1=[C][C]=C(C(=C1O[C])O[C])O             | -8.9 |
| 10193212<br>1 | C1(=C(C(=C2C(=[C]1)OC(=[C]C2=O)C1=[C][C]=C([C]=[C]1)O)O)O[C])O[C]1O[C]([C]([C]([C]1O)O)O)[C]                 | -8.9 |
| 10188771<br>8 | C1(=C([C]=C(C2=C1OC(=[C]C2=O)C1=[C][C]=C([C]=[C]1)O)O)O)[C]1O[C]([C])([C])([C]1)O)O                          | -8.9 |
| 10136776<br>7 | O1C2=C(C(=[C]C(=C2C(=O)[C][C]1C1=[C][C]=C([C]=[C]1)O)O)O)[C]/[C]=C([C])/[C]=O                                | -8.9 |
| 10106405<br>5 | C1(=[C]OC2=[C][C]=[C][C]=C2C1=O)C1=[C][C]=C([C]=[C]1)C(F)(F)F                                                | -8.9 |
| 10102840<br>2 | O1C(=[C]C(=O)C2=C1[C]=C(C(=C2O)N[C][C]([C])([C])O)C1=[C][C]=[C][C]=[C]1                                      | -8.9 |
| 10094174<br>9 | O1C2=[C]C(=C(C(=C2C(=O)[C][C]1C1=[C]C(=[C]=[C]1)O[C])O)O)C1=[C][C]=[C][C]=[C]1O                              | -8.9 |
| 71588424      | O1C2=[C]C(=O)[C]3C(=O)[C]=C(O[C]3C2=C([C](C1([C])([C])O)O)C1=[C][C]=C([C]=[C]1)O                             | -8.9 |
| 66783913      | O1C(=[C]C(=O)C2=C(C3=C([C]=C12)O[C]O3)O)C1=[C][C]=C([C]=[C]1)O[C]                                            | -8.9 |
| 66728267      | C1(=[C]C(=[C][C]=C1O)C1=[C]OC2=[C]C(=[C]C(=C2C1=O)O)O)[C][C]C([C])([C])O                                     | -8.9 |
| 54505099      | O1C2=C([C]=[C][C]=[C]2)C(=O)/C(=[C]\N2[C]=N[C]=[C]2)/[C]1C1=[C][C]=[C][C]=[C]1                               | -8.9 |
| 49788614      | o1c2[C]=C([C]=C(c2c(=O)c(c1C1=[C]C2=C([C]=[C]1)O[C]O2)O[C][C]=C([C])([C])O)O)[C]                             | -8.9 |
| 44578052      | O1C(=[C]C(=O)c2c(c(c(c12)[C]N1[C][C][C][C]1)O)O)O)C1=[C][C]=[C][C]=[C]1                                      | -8.9 |
| 44265534      | C1(=[C]C(=O)C2=C(C(=[C]=C2O)O)C2=[C][C]N([C])([C][C]2)O1)C1=C(F)[C]=[C][C]=[C]1                              | -8.9 |
| 44259326      | O1C2=[C]C(=c3c(=O)c(c(oc3=C2[C]([C])([C])C1([C])([C])C1=[C]C(=[C]=[C]1)O)O)O)O                               | -8.9 |
| 44258305      | C1(=[C]C(=C2C(=O)[C]=C(OC2=[C]1)C1=[C][C]=C([C]=[C]1)O)O[C])O[C][C]1OC1([C])([C]                             | -8.9 |
| 42607940      | c1(c2c([C]=[C]C([C])([C])O2)c(c2C(=O)[C][C](Oc12)C1=[C][C]=C([C]=[C]1)O)O)[C]([C]1OC1([C])([C])O             | -8.9 |
| 24205532      | C1(=[C]c2c(C(=[C]1)O[C])c(=O)c(c(o2)C1=[C][C]=C([C]=[C]1)O)[C][C]=C([C])([C])O[C]1O[C]([C]([C]([C]1O)O)O)[C] | -8.9 |
| 21315742      | C1(=[C]C(=O)C2=C([C]=[C]C(=[C]2)C(=O)O)O1)C1=[C]C(=[C][C]=C1O[C]([C])([C])([C])                              | -8.9 |

|          |                                                                                              |      |
|----------|----------------------------------------------------------------------------------------------|------|
| 15160702 | O1C2=C([C]=[C]C3=C2[C]=[C]C(O3)([C])([C])C(=O)[C][C]1C1=[C][C]=C(C(=[C]1)O[C])O[C]           | -8.9 |
| 14237660 | C1(=[C]OC2=C(C(=[C]C(=[C]2)O)O)C1=O)C1=[C][C]=C2OC([C]=[C]C2=[C]1)([C])[C]                   | -8.9 |
| 12918915 | C1(=[C][C]=C2C(=O)C(=[C]OC2=[C]1)C1=[C][C]=[C][C]=[C]1)O[C](C1=[C][C]=[C][C]=[C]1)[C][C]N[C] | -8.9 |
| 12093281 | O1C2=[C][C]=[C][C]=C2C(=O)/C(=[C]\C2=[C][C]=C([C]=[C]2)N(=O)=O)/[C]1C1=[C][C]=[C][C]=[C]1    | -8.9 |
| 11639597 | C1(=[C][C]=C2C(=O)[C]=C(OC2=[C]1)C1=[C][C]=C(C(=[C]1)O)O)O[C][C](O)[C]N[C]([C])[C]           | -8.9 |
| 11024735 | O1C2=C([C]=[C][C]=[C]2)C(=O)/C(=[C]/C2=[C][C]=C([C]=[C]2)N(=O)=O)/[C]1C1=[C][C]=[C][C]=[C]1  | -8.9 |
| 10472357 | O1C(=[C]C(=O)C2=C(C(=C([C]=C12)O)N[C][C][C]([C])([C])O)C1=[C][C]=[C][C]=[C]1                 | -8.9 |
| 10337211 | O1C2=[C]C=C([C]=C2C(=O)[C][C]1C1=[C][C]=C([C]=[C]1)O)[C][C]=C([C])([C])O[C]                  | -8.9 |
| 9951997  | C1(=[C]C(=O)C2=C([C]=C(C(=C2O1)C1=[C][C]N([C])[C][C]1)O)O)C1=[C][C]=[C][C]=C1Cl              | -8.9 |
| 7330537  | O1C2=[C][C]=C3C(=O)C(=[C]OC3=C2[C]=[C]C1([C])([C])C1=[C]C2=C(C(=[C]1)O[C])O[C]O2             | -8.9 |
| 5317765  | c1(c(c(=O)c2=C([C]=C([C]=c2o1)O)O)O)C1=[C]C2=C(OC([C]([C]2)O)([C])([C])[C]=[C]1              | -8.9 |
| 5281814  | O1[C]=C(C(=O)C2=C1[C]=C(C(=C2O)[C][C]=C([C])([C])O)C1=[C][C]=C([C]=[C]1)O                    | -8.9 |
| 509245   | O1C2=C(C(=[C]C(=C2C(=O)[C][C]1C1=[C][C]=C([C]=[C]1)O)O)O)[C][C]=C([C])([C])                  | -8.9 |
| 343080   | O1[C]=C(C(=O)C2=C1[C]=C([C]=[C]2)O[C][C]=C([C])([C])C1=C([C]=C2C(=[C]1)O[C]O2)O[C]           | -8.9 |
| 129224   | C1(=[C]C2=C([C]=[C]1)C(=O)[C]=C(O2)C1=[C][C]=C([C])([C]=[C]1)O[C][C](O)[C]N[C]([C])[C]       | -8.9 |
| 122835   | O1C2=[C]C=C([C]=C2C(=O)[C][C]1C1=[C][C]=C([C]=[C]1)O)[C][C]=C([C])([C])O[C]                  | -8.9 |
| 13602334 | C1(=[C]C(=O)C2=C([C]=C(C(=C2O1)C1=[C][C]=N[C]=[C]1)O)O)C1=[C][C]=[C][C]=C1Cl                 | -8.8 |
| 3        |                                                                                              |      |
| 13254029 | o1c2[C]=C([C]=C(c2c(=O)c(c1C1=[C][C]=C(C(=[C]1)OC(=O)[C])OC(=O)[C])O)O)O                     | -8.8 |
| 7        |                                                                                              |      |
| 10206691 | o1c(c(c(=O)c2=C(C(=C([C]=c12)O[C]C1=[C][C]=[C][C]=[C]1)O[C])O)O)C1=[C][C]=[C][C]=[C]1        | -8.8 |
| 8        |                                                                                              |      |
| 10200537 | C1(=[C]C(=O)C2=C([C]=C(C(=C2O1)C1=[C][C]N([C])[C][C]1)O[C])O[C])C1=[C][C]=[C]C(=[C]1)Cl      | -8.8 |
| 7        |                                                                                              |      |
| 10184348 | C1(=[C]C2=C([C]=[C]1)O[C]([C]C2=O)C1=[C][C]=[C][C]=[C]1)O[C]1O[C]([C]([C]([C]1O)O)O[C])[C]O  | -8.8 |
| 5        |                                                                                              |      |
| 10121493 | C1(=[C][C]=C([C]=[C]1)N1[C][C]N([C][C]1)C1=[C][C]=N[C]=[C]1)c1oc2=[C][C]=[C][C]=c2c(=O)c1O   | -8.8 |
| 8        |                                                                                              |      |
| 91724402 | O1C2=[C]C(=[C]C(=C2C(=O)[C][C]1C1=[C][C]=C([C]=[C]1)OC(=O)[C])O)O[C]                         | -8.8 |
| 71588336 | O1C2=[C]C(=C3C(=O)[C]=C(OC3=C2[C]([C](C1([C])([C])O)O)C1=[C][C]=C([C]=[C]1)O)O               | -8.8 |

|          |                                                                                                                   |      |
|----------|-------------------------------------------------------------------------------------------------------------------|------|
| 57253387 | <chem>O1C2=C([C]=[C][C]=[C]2)[C]([C][C]1C1=[C][C]=[C][C]=[C]1)[N]NC(=O)N</chem>                                   | -8.8 |
| 56648913 | <chem>C1(=C(C(=C2C(=[C]1)OC(=[C]C2=O)C1=[C][C]=[C][C]=[C]1)OC(=O)[C])OC(=O)[C])O[C]C1=[C][C]=C(F)[C]=[C]1</chem>  | -8.8 |
| 54488609 | <chem>c1(c(=O)c2[C]=[C][C]=[C]c2oc1C1=[C][C]=[C][C]=[C]1)O[C]1O[C]([C]([C]([C]1O)O)O)[C]O</chem>                  | -8.8 |
| 53247947 | <chem>C1(=[C][C]=C([C]=[C]1)[C]1[C]C(=O)C2=C([C]=[C][C]=[C]2)O1)O[C]1O[C]([C]([C]([C]1O)O)O)[C]O</chem>           | -8.8 |
| 46173806 | <chem>c1(c(=O)c2[C]=[C][C]=[C]c2oc1C1=[C][C]=[C][C]=[C]1)O[C]1O[C]([C]([C]([C]1O)O)O)[C]O</chem>                  | -8.8 |
| 44258651 | <chem>O1C(=[C]C(=O)c2c(c(c(c12)O[C])O)O[C])O)C1=[C]C2=C([C]=[C]1)O[C]O2</chem>                                    | -8.8 |
| 42608112 | <chem>O1c2c(c(c(c2C(=O)[C][C]1C1=[C][C]=[C][C]=[C]1)O)[C]C1=[C]C(=[C][C]=C1O)O[C])O[C])O[C]</chem>                | -8.8 |
| 42608036 | <chem>O1[C]([C]C(=O)C2=C1C(=C([C]=C2O)O)[C][C]([C]([C])O)[C]C(=[C])O)[C]C1=[C][C]=C([C]=C1O[C])O</chem>           | -8.8 |
| 42607957 | <chem>O1C2=C(C(=[C]C(=C2C(=O)[C][C]1C1=[C][C]=C([C]=[C]1)O[C])O)O)[C]C(=[C])O</chem>                              | -8.8 |
| 42607939 | <chem>O1C([C])([C])[C]=[C]c2c(c3C(=O)[C][C](O)c3c(c12)[C][C](C(=[C])[C])O)C1=[C][C]=C([C]=[C]1)O)O</chem>         | -8.8 |
| 23724473 | <chem>c1(c(=O)c2[C]=[C][C]=[C]c2oc1C1=[C][C]=[C][C]=[C]1)O[C]1O[C]([C]([C]([C]1O)O)O)[C]O</chem>                  | -8.8 |
| 21604819 | <chem>O1C2=C(C(=[C][C]=C2[C][C]1C1=[C][C]=C([C]=[C]1)O)O)[C][C]=C([C])[C]</chem>                                  | -8.8 |
| 20301090 | <chem>O1C2=C([C]=[C][C]=[C]2)C(=O)C(=[C])[C]1C1=[C][C]=C([C]=[C]1)N(=O)=O</chem>                                  | -8.8 |
| 16126803 | <chem>c1(c(=O)c2[C]=[C][C]=[C]c2oc1C1=[C][C]=[C][C]=[C]1)O[C]1O[C]([C]([C]([C]1O)O)O)[C]O</chem>                  | -8.8 |
| 16072086 | <chem>C1(=[C]C(=O)C2=C([C]=C(C(=C2O1)C1=[C][C]N([C])[C][C]1)O)O)C1=[C][C]=[C]C(=[C]1)Cl</chem>                    | -8.8 |
| 12820520 | <chem>O1C2=C([C]=c3c(=O)c(c(oc3=C2[C]=[C]C1([C])[C])C1=[C]C2=C([C]=[C]1)O[C]O2)O[C])O[C]</chem>                   | -8.8 |
| 12428924 | <chem>O1C2=[C][C]=[C][C]=C2C(=O)/C(=[C]\C2=[C][C]=C([C]=[C]2)O)/[C]1C1=[C][C]=[C][C]=[C]1</chem>                  | -8.8 |
| 12146121 | <chem>O1C(=[C]C(=O)C2=C1[C]=C([C]=C2O[C][C]=C([C])[C])O[C]O[C])C1=[C][C]=[C][C]=[C]1</chem>                       | -8.8 |
| 12043069 | <chem>C1(=[C]C(=O)C2=C(C(=C([C]=C2O)O)C2=[C]N=[C]N=[C]2)O1)C1=C(Cl)[C]=[C][C]=[C]1</chem>                         | -8.8 |
| 11953828 | <chem>c1(c(=O)c2=[C][C]=[C][C]=c2oc1C1=[C][C]=[C][C]=[C]1)O[C]1O[C]([C]([C]([C]1O)O)O)[C]O</chem>                 | -8.8 |
| 11552747 | <chem>C1(=[C][C]=C2C(=O)[C]=C(OC2=[C]1)C1=[C]C(=[C]C(=[C]1)O)O)O[C][C](O)[C]N([C])([C])[C]</chem>                 | -8.8 |
| 11382659 | <chem>C1(=[C]C(=C(C(=[C]1)O)O[C])[C][C]=C([C])[C])[C]1OC2=[C]C(=[C][C]=C2C(=O)[C]1)O</chem>                       | -8.8 |
| 11244593 | <chem>O1C2=[C]C(=C([C]=C2[C]=[C]C1([C])[C])C1=[C]OC2=C([C]=[C]C(=[C]2)O)C1=O)O</chem>                             | -8.8 |
| 11111496 | <chem>O1C2=C(C(=[C]C(=C2C(=O)[C][C]1C1=[C][C]=C(C(=[C]1)O)O)O)O)[C]/[C]=C([C])/[C]O</chem>                        | -8.8 |
| 10598514 | <chem>O1[C]([C]C(=O)C2=C1C(=C([C]=C2O)O)[C][C](C(=[C])[C])[C][C]C([C])([C])O)C1=C([C]=[C][C]=[C]1)O</chem>        | -8.8 |
| 10546844 | <chem>C1(=[C]OC2=C(C(=[C]C(=[C]2)O)O[C])C1=O)C1=[C]C(=C2OC([C]=[C]C2=[C]1)([C])[C])O</chem>                       | -8.8 |
| 10543665 | <chem>C1(=[C]C(=O)C2=C([C]=[C][C]=C2O[C])O1)C1=[C]C(=[C][C]=[C]1)C(F)(F)F</chem>                                  | -8.8 |
| 10050660 | <chem>O1C2=C(C(=[C]C(=C2C(=O)[C][C]1C1=[C][C]=C([C]=[C]1)O[C])O[C])O[C])[C]1C(=O)C2=[C][C]=C([C]=C2O1)O[C]</chem> | -8.8 |
| 5372237  | <chem>o1c2[C]=[C][C]=C(c2c(=O)c(c1C1=[C][C]=C([C]=[C]1)O[C])C(=O)C1=[C][C]=C([C]=[C]1)O[C])O</chem>               | -8.8 |

|               |                                                                                                 |      |
|---------------|-------------------------------------------------------------------------------------------------|------|
| 5317756       | O1C(=O)C(=[C]C2=C(C(=C([C]=C12)O)[C][C]=C([C])[C])O[C])C1=[C][C]=C([C]=C1O)O                    | -8.8 |
| 5317478       | O1[C]=C(C(=O)C2=C(C(=C([C]=C12)O)[C][C]=C([C])[C])O)C1=[C][C]=C([C]=[C]1)O[C]                   | -8.8 |
| 5315125       | O1C2=C(C(=[C]C(=[C]2)O)O)C(=O)[C]=C1C1=[C]C(=C(C(=[C]1)O)O)[C][C]=C([C])[C]                     | -8.8 |
| 5281797       | O1[C]=C(C(=O)C2=C1[C]=C(C(=C2O)[C][C]=C([C])[C])O)C1=[C][C]=C([C]=C1O)O                         | -8.8 |
| 5281789       | O1[C]=C(C(=O)C2=C1[C]=C([C]=C2O)O)C1=C(C(=C([C]=[C]1)O)[C][C]=C([C])[C])O                       | -8.8 |
| 624794        | o1c2=[C][C]=[C][C]=c2c(=O)c(c1C1=[C][C]=C2C(=[C]1)O[C]O2)O                                      | -8.8 |
| 462700        | O1C2=[C][C]=[C][C]=C2C(=O)[C][C]1C1=[C]C(=C([C]=[C]1)O)O                                        | -8.8 |
| 343079        | O1[C]=C(C(=O)C2=C1C1=C([C]=[C]2)O[C]O1)C1=[C][C]=C2C(=[C]1)O[C]O2                               | -8.8 |
| 227443        | o1c(c(=O)c2=[C]C(=[C][C]=c12)[C])O)C1=[C][C]=C([C]=[C]1)O[C]                                    | -8.8 |
| 49736         | o1c(c([C])c(=O)c2[C]=[C]C(=C(c12)[C]N1[C][C][C][C]1)O[C])C1=[C][C]=[C][C]=[C]1                  | -8.8 |
| 14570642<br>7 | O1C2=C([C]=[C][C]=[C]2)C(=O)[C][C]1C1=[C]C(=[C]C(=[C]1)O)O[C]                                   | -8.7 |
| 13959387<br>8 | O1C(=[C]C(=O)C2=C1C(=[C]C(=[C]2)[C][C][C]O)O[C])C1=[C][C]=C([C]=[C]1)O[C]                       | -8.7 |
| 13361176<br>9 | C1(=[C]C2=C([C]=[C]1)C(=O)C(=[C]O2)C1=[C]C(=[C]C(=[C]1)O[C])O)O[C]1O[C]([C]([C]([C]1O)O)O)[C]O  | -8.7 |
| 13253349<br>0 | O1[C]=C(C(=O)C2=C1[C]=C(C(=C2O)[C][C](C(=[C])[C])O)O)C1=[C][C]=C2C(=[C]1)O[C]O2                 | -8.7 |
| 12982116<br>5 | C1(=C([C]=C2C(=C1O)C(=O)[C][C](O2)C1=[C][C]=[C][C]=[C]1)O[C])[C][C]1OC1([C])[C]                 | -8.7 |
| 12971674<br>8 | [P@]12(=O)O[C]3[C]4C5=C([C]=[C][C]=[C]5)O[P@]5(=O)O[C]6[C]([C]([C]([C]([C]6O1)O2)C3=O)O4)O5     | -8.7 |
| 12968443<br>5 | O1C2=C([C]=[C][C]=[C]2)[C][C]([C]1C1=[C][C]=[C][C]=[C]1)O                                       | -8.7 |
| 12238334<br>4 | O1C2=[C]C(=C([C]=C2C(=O)[C][C]1C1=[C][C]=C([C]=[C]1)O)[C][C](C(=[C])[C])O)O                     | -8.7 |
| 10234148<br>7 | C1(=[C]C(=C2C(=O)[C]=C(OC2=[C]1)C1=[C][C]=C(C(=[C]1)O[C])O[C])O)O[C]1O[C]([C]([C]([C]1O)O)O)[C] | -8.7 |
| 10230725<br>5 | c1(c(=O)c2[C]=[C][C]=[C]c2oc1C1=[C][C]=[C][C]=[C]1)C(F)(F)F                                     | -8.7 |

|               |                                                                                                     |      |
|---------------|-----------------------------------------------------------------------------------------------------|------|
| 10200538<br>0 | C1(=[C]C(=O)C2=C(C(=C([C]=C2O[C])O[C])C2=[C][C]N([C])[C][C]2)O1)C1=C(Br)[C]=[C][C]=[C]1             | -8.7 |
| 10200537<br>3 | C1(=[C]C(=O)C2=C(C(=C([C]=C2O[C])O[C])[C]2[C]N([C])[C][C][C]2)O1)C1=C(Cl)[C]=[C][C]=[C]1            | -8.7 |
| 10193217<br>3 | C1(=C(C(=C2C(=O)[C][C](OC2=[C]1)C1=[C][C]=[C][C]=[C]1)O)O[C])O[C]1O[C]([C]([C]([C]1O)O)O)[C]O       | -8.7 |
| 10184348<br>6 | C1(=[C]C2=C([C]=[C]1)O[C]([C]C2=O)C1=[C][C]=[C][C]=[C]1)O[C]1O[C]([C]([C]([C]1O)O)O)[C]O            | -8.7 |
| 90300755      | o1c(c(c(=O)c2[C]=[C][C]=C(c12)[C][C]=C([C])[C])O)C1=[C][C]=[C][C]=[C]1                              | -8.7 |
| 71588337      | O1C2=C(C3=C(C(=[C]2)O)C(=O)[C]=C(O3)C2=[C][C]=C([C]=[C]2)O)[C]([C](C1([C])[C])O)O[C][C]             | -8.7 |
| 67424417      | C1(=[C][C]=C([C]=[C]1)[C]1[C]C(=O)C2=C([C]=[C][C]=[C]2)O1)S(=O)(=O)C(F)(F)F                         | -8.7 |
| 56649091      | C1(=[C]C2=C(C(=C1O)O)C(=O)[C]=C(O2)C1=[C][C]=[C][C]=[C]1)O[C][C]N1[C][C][C][C][C]1                  | -8.7 |
| 56649090      | C1(=C(C(=C2C(=O)[C]=C(OC2=[C]1)C1=[C][C]=[C][C]=[C]1)O)O)O[C][C]N1[C][C]O[C][C]1                    | -8.7 |
| 44481784      | O1[C]=C(C(=O)C2=C([C]=C([C]=C12)O[C])O)C1=[C]C(=C([C]=[C]1)O)[C][C](C(=[C])[C])O                    | -8.7 |
| 44342639      | C1(=C([C]=C(C2=C1OC(=[C]C2=O)C1=[C][C]=[C][C]=[C]1)O)O[C])C(F)(F)F                                  | -8.7 |
| 44265521      | C1(=[C]C(=O)C2=C([C]=C(C(=C2O1)C1=[C][C]N([C])[C][C]1)O)O)C1=[C][C]=C([C]=C1Cl)Cl                   | -8.7 |
| 44259050      | O1C2=[C]c3c(c(=O)c(c(o3)C3=[C][C]=C([C]=[C]3)O)O)C(=C2[C]=[C]C1([C])[C])O                           | -8.7 |
| 42607959      | C1(=[C]C(=C(C(=[C]1)[C][C]=C([C])[C])O[C])/[C]=[C]/C([C])([C])O)[C]1OC2=[C]C(=[C]C(=C2C(=O)[C]1)O)O | -8.7 |
| 42607870      | O1C2=C(C(=[C]C(=C2C(=O)[C][C]1C1=[C][C]=[C][C]=[C]1)O)O)[C]/[C]=C([C])/[C]=O                        | -8.7 |
| 25067674      | C1(=[C]C(=O)C2=C([C]=C(C(=C2O1)[C]1[C][C]N([C])[C][C]1O)O[C])O[C])C1=[C][C]=[C][C]=C1Cl             | -8.7 |
| 22737159      | O1C2=[C][C]=[C][C]=C2[C][C]([C]1C1=[C][C]=[C][C]=[C]1)OC(=O)C1=[C]C(=C(C(=[C]1)O)O)O                | -8.7 |
| 21325023      | O1C2=C([C]=[C]C(=[C]2)C(=O)O)C(=O)[C]=C1C1=C([C]=[C][C]=[C]1)O[C]([C])[C]                           | -8.7 |
| 21325016      | C1(=[C]C(=O)C2=[C]C(=[C][C]=C2O1)C(=O)O)C1=C([C]=[C][C]=[C]1)O[C][C]([C][C])O                       | -8.7 |
| 15389730      | C1(=[C][C]=[C]C(=[C]1)C1=[C]C(=O)C2=C([C]=[C][C]=[C]2)O1)S(=O)(=O)N([C][C])[C][C]                   | -8.7 |
| 14033976      | O1C2=C(C3=C(C(=[C]2)O[C])C(=O)[C]=C(O3)C2=[C][C]=C3C(=[C]2)O[C]O3)[C]=[C]C1([C])[C]                 | -8.7 |
| 12753167      | [C]1(C(=[C])C(=O)C2=C([C]=[C][C]=[C]2)O1)C1=[C][C]=C(Cl)[C]=[C]1                                    | -8.7 |
| 12318031      | O1C2=C([C]=[C][C]=[C]2)[C][C]([C]1C1=[C][C]=[C][C]=[C]1)O                                           | -8.7 |
| 12052874      | O1C2=C([C]=[C]C(=[C]2)O)[C][C][C]1C1=[C]C2=C([C]=[C]1)O[C]O2                                        | -8.7 |
| 12043065      | C1(=[C]C(=O)C2=C([C]=C(C(=C2O1)[C]1[C]N([C])[C][C][C]1O)O)O)C1=[C][C]=[C][C]=C1Cl                   | -8.7 |

|          |                                                                                                  |      |
|----------|--------------------------------------------------------------------------------------------------|------|
| 11810419 | O1C2=C(C(=[C]C(=C2C(=O)[C][C]1C1=[C][C]=C([C]=C1O)O)O)[C][C]=C([C])[C]                           | -8.7 |
| 11723752 | O1[C]=C(C(=O)C2=C1[C]=C([C]=C2[C])OC(=O)O[C][C])C1=[C][C]=[C][C]=[C]1                            | -8.7 |
| 11711336 | c1(c(=O)c2=[C][C]=[C][C]=c2oc1C1=[C][C]=[C][C]=[C]1)O[C]1O[C]([C]([C]([C]1O)O)O[C])[C]O          | -8.7 |
| 11611332 | C1(=[C]C2=C([C]=[C]1)C(=O)[C]=C(O2)C1=[C][C]=C(C(=[C]1)O[C])O[C])O[C][C](O)[C]N[C]([C])[C]       | -8.7 |
| 11507421 | O1C2=[C][C]=[C][C]=C2C(=O)[C]=C1C1=[C][C]=C([C]=[C]1)OC(=O)[C]                                   | -8.7 |
| 11177340 | O1C(=[C]C(=O)C2=C1[C]=C([C]=C2O[C][C]=C([C])[C])O[C]O[C][C]O[C])C1=[C][C]=[C][C]=[C]1            | -8.7 |
| 11164320 | c1(c(c(=O)c2[C]=[C]C(=[C]c2o1)O)C1=[C][C]=[C][C]=[C]1)S[C]C1=[C][C]=N[C]=[C]1                    | -8.7 |
| 10889522 | O=C1C2=C([C]=[C][C]=[C]2)N[C]([C]1)C1=[C][C]=[C][C]=[C]1                                         | -8.7 |
| 10832934 | O1C2=[C][C]=C([C]=C2[C]([C](C1([C])[C])O)O)C1=[C]OC2=C(C(=[C]C(=[C]2)O)O)C1=O                    | -8.7 |
| 10317448 | c1(c(c(=O)c2[C]=[C]C(=[C]c2o1)O)C1=[C][C]=C([C]=[C]1)O)S[C]C1=[C][C]=N[C]=[C]1                   | -8.7 |
| 9948081  | C1(=[C]C2=C([C]=[C]1)C(=O)[C]=C(O2)C1=[C][C]=[C][C]=[C]1)O[C][C]1O[C]1                           | -8.7 |
| 5469928  | O1C(=[C]C(=O)C2=C1C(=C([C]=C2O)O)[C]1[C][C][C][C]N1)C1=[C][C]=[C][C]=[C]1                        | -8.7 |
| 5326329  | O1[C]=C(C(=O)C2=[C][C]=C(C(=C12)[C][C]=C([C])[C])O)C1=[C]C(=C([C]=[C]1)O[C])O                    | -8.7 |
| 3707243  | O1C2=C([C]=[C][C]=[C]2)[C][C]([C]1C1=[C][C]=[C][C]=[C]1)O                                        | -8.7 |
| 3534982  | O1C2=C([C]=[C][C]=[C]2)C(=O)[C][C]1C1=[C]C(=[C][C]=[C]1)O                                        | -8.7 |
| 3070247  | c1(c([C])c(=O)c2[C]=[C]C(=C(c2o1)[C]N1[C][C][C][C]1)O[C])C1=[C][C]=C(Cl)[C]=[C]1                 | -8.7 |
| 3033107  | C1(=[C][C]=C([C]=[C]1)c1c([C])c(=O)c2=[C][C]=[C][C]=c2o1)O[C][C](O)[C]N(C([C])([C])[C])          | -8.7 |
| 688861   | O1C2=C([C]=[C][C]=[C]2)C(=O)[C][C]1C1=[C]C(=[C][C]=[C]1)O                                        | -8.7 |
| 637879   | O1[C]=C(C(=O)C2=C(C3=C([C]=C12)O[C]O3)O[C])C1=[C][C]=C2C(=[C]1)O[C]O2                            | -8.7 |
| 635396   | C1(=C([C]=C(C2=C1OC(=[C]C2=O)C1=[C][C]=C([C]=[C]1)O[C])O[C])O[C])[C]1O[C]([C]([C]([C]1O)O)O)[C]O | -8.7 |
| 625631   | O1C(=[C]C(=O)C2=C1[C]=[C]C1=C2[C]=[C]C(=[C]1)O)C1=[C][C]=[C][C]=[C]1                             | -8.7 |
| 466078   | O1C2=C([C]=[C]C(=[C]2)O)[C][C][C]1C1=[C]C2=C([C]=[C]1)O[C]O2                                     | -8.7 |
| 54410    | C1(=[C]C2=C([C]=[C]1)C(=O)[C]=C(O2)C1=[C][C]=[C][C]=[C]1)O[C][C](O)[C]N[C][C][C]                 | -8.7 |
| 41450    | C1(=[C][C]=C([C]=[C]1)C1=[C]C(=O)C2=[C][C]=[C][C]=C2O1)O[C][C](O)[C]N(C([C])([C])[C])            | -8.7 |
| 11834    | C1(=[C]C2=C([C]=[C]1)C(=O)[C]=C(O2)C1=[C][C]=[C][C]=[C]1)O[C][C]([C])[C]N([C])[C]                | -8.7 |
| 13958412 | O1[C]=C(C(=O)C2=C([C]=C([C]=C12)O[C])O)C1=[C][C]=C([C]=[C]1)O[C][C]=C([C])[C]                    | -8.6 |
| 4        |                                                                                                  |      |
| 12988194 | c1(c(=O)c2=[C][C]=[C][C]=c2oc1C1=[C][C]=[C][C]=[C]1)[C]1O[C]([C])[C]([C]([C]1)O)O                | -8.6 |
| 0        |                                                                                                  |      |

|               |                                                                                                 |      |
|---------------|-------------------------------------------------------------------------------------------------|------|
| 12982449<br>8 | O1C(=[C]C(=O)C2=C1C(=C([C]=C2O[C])O[C])C1=[C][C]=C(C(=[C]1)O[C])O[C])C1=[C][C]=[C][C]=[C]1      | -8.6 |
| 12967509<br>9 | o1c2=[C][C]=[C][C]=c2c(=O)c(c1c1=[C][C]=[C][C]=[C]1)OC(=O)C1=[C]C=C(C(=[C]1)O)O)O               | -8.6 |
| 10236976<br>3 | O1C2=[C][C]=C3[C][C][C](OC3=C2[C][C]1C([C])([C])O)C1=[C][C]=C([C]=[C]1)O                        | -8.6 |
| 10200537<br>8 | C1(=[C]C(=O)C2=C(C(=C([C]=C2O[C])O[C])C2=[C][C]N([C])[C][C]2)O1)C1=[C][C]=C(Cl)[C]=[C]1         | -8.6 |
| 10094338<br>2 | ClC1=[C]C(=[C]C(=C1O[C])S(=O)(=O)N[C]([C])([C])C1=[C]C(=O)C2=C([C]=[C][C]=[C]2)O1               | -8.6 |
| 91557562      | O1C2=C([C]=[C]C(=[C]2)O)C(=O)[C][C]1C1=[C][C]=C([C]=C1O)O                                       | -8.6 |
| 76852307      | O1C(=[C]C(=O)C2=C1C(=C([C]=[C]2)O)[C]=O)C1=[C][C]=[C][C]=[C]1                                   | -8.6 |
| 74819425      | O1C2=[C]C3=C(C(=C2C(=O)[C][C]1C1=C([C]=[C][C]=[C]1)O)O)O[C]O3                                   | -8.6 |
| 59059924      | O1[C]=C(C(=O)C2=[C][C]=C([C]=C12)OC(=O)C(=[C])([C])C1=[C][C]=[C][C]=[C]1                        | -8.6 |
| 57679080      | O1C2=[C][C]=[C][C]=C2[C][C][C]1C1=[C][C]=C(C(=[C]1)O)O                                          | -8.6 |
| 53947837      | O1C2=[C][C]=C([C])[C]=C2[C][C][C]1C1=[C][C]=C([C]=[C]1)O[C]                                     | -8.6 |
| 50909808      | O1[C]=C(C(=O)C2=C([C]=C([C]=C12)O)[O])C1=[C][C]=C2C(=[C]1)O[C]O2                                | -8.6 |
| 44259047      | C1(=C(c2c([C]=C1O)oc(c2=O)O)C1=[C][C]=C([C]=[C]1)O)O)[C][C]C([C])([C])O                         | -8.6 |
| 42607933      | O1C2=C(C(=[C]C(=C2C(=O)[C][C]1C1=[C][C]=C([C]=[C]1)O)O)O)[C][C](C(=[C])([C])O                   | -8.6 |
| 25128870      | O1C(=[C]C(=O)C2=C1[C]=C([C]=C2O[C])O[C]C1=N[N]N[N]1)C1=[C][C]=C(C(=[C]1)O[C])O[C]               | -8.6 |
| 23286063      | o1c(c(c(=O)c2=[C]C(=[C][C]=c12)C(=O)O)O)C1=[C][C]=[C][C]=[C]1                                   | -8.6 |
| 18324937      | c1(c(c(=O)c2=[C][C]=[C][C]=c2o1)C1=[C][C]=C([C]=[C]1)F)C1=[C][C]=C([C]=[C]1)S(=O)(=O)N          | -8.6 |
| 15731439      | O1C(=[C]C(=O)C2=[C][C]=C(C(=C12)OC(=O)[C])OC(=O)[C])C1=[C][C]=[C][C]=[C]1                       | -8.6 |
| 15389726      | C1(=[C]C(=O)C2=[C][C]=[C][C]=C2O1)C1=[C][C]=C([C]=[C]1)S(=O)(=O)Cl                              | -8.6 |
| 14630497      | o1c(c(c(=O)c2=C([C]=C3C(=c12)[C]=[C]C([C])([C])O3)O)[C][C]C([C])([C])O)C1=C([C]=C(C(=[C]1)O)O)O | -8.6 |
| 14502737      | O1C2=C(C3=C(C(=[C]2)O)C(=O)C(=[C]O3)C2=[C][C]=C3C(=[C]2)O[C]O3)[C]=[C]C1([C])[C]                | -8.6 |
| 14134114      | o1c(c(c(=O)c2C(=[C]C(=C(c12)C(=O)[C][C]([C])C(=O)O)O)O)O)C1=[C][C]=C([C]=[C]1)O                 | -8.6 |
| 14130926      | o1c(c(c(=O)c2=C([C]=C([C]=C12)OC(=O)[C])OC(=O)[C])OC(=O)[C])C1=[C][C]=C([C]=[C]1)OC(=O)[C]      | -8.6 |
| 14016776      | C1(=[C]C(=C2C(=O)[C]=C(OC2=[C]1)C1=[C][C]=C([C]=[C]1)O)O)OS([O])([O])O                          | -8.6 |



|          |                                                                                                 |      |
|----------|-------------------------------------------------------------------------------------------------|------|
| 12988090 | C1(=[C]C2=C([C]=[C]1)C(=O)[C]=C(O2)C1=[C][C]=[C][C]=[C]1)OP(=O)(O[C][C])O[C][C]                 | -8.6 |
| 11954210 | C1(=[C][C]=c2c(=O)c(c(oc2=[C]1)C1=[C][C]=[C][C]=[C]1)O)O[C]1O[C]([C]([C]([C]1O)O)O)[C]O         | -8.6 |
| 11725803 | O1C2=C(C(=[C]C(=[C]2)O)O)C(=O)[C][C]1C1=[C]C=C(C(=[C]1)O)O)[C][C]=C([C])[C]                     | -8.6 |
| 11612258 | C1(=[C]C2=C([C]=[C]1)C(=O)[C]=C(O2)C1=[C]C=C(C(=[C]1)O[C])O[C])O[C]O[C][C](O)[C]NC([C])([C])[C] | -8.6 |
| 10708855 | C1(=[C]C(=O)C2=C([C]=[C][C]=[C]2)O1)C1=[C]C(=[C][C]=[C]1)[C]N=C=S                               | -8.6 |
| 10543327 | C1(=[C]C(=O)C2=[C][C]=[C][C]=C2O1)C1=[C][C]=[C]C(=[C]1)[C]Br                                    | -8.6 |
| 10450773 | O1C(=[C]C(=O)C2=C1[C]=C(C(=C2O)/[C]=[C]/[C]([C])([C])O)C1=C([C]=C([C]=[C]1)O)O                  | -8.6 |
| 9973510  | O1C2=C([C]=C([C]=[C]2)C(=O)O)C(=O)[C]=C1C1=C([C]=[C][C]=[C]1)O[C]([C])[C]                       | -8.6 |
| 9950264  | C1(=C(C2=C([C]=C1O)OC(=[C]C2=O)C1=[C][C]=[C][C]=[C]1)O)OS([O])([O])O                            | -8.6 |
| 9928523  | O1C2=C(C(=[C]C(=C2C(=O)[C][C]1C1=[C][C]=C([C]=[C]1)O)O[C])O)[C][C]=C([C])[C]                    | -8.6 |
| 5481229  | O1C2=C(C(=[C]C(=C2O)O[C])C2=[C]OC3=[C]C(=[C]C(=C3C2=O)O)O)[C]=[C]C1([C])[C]                     | -8.6 |
| 5471244  | C1(=[C]C(=C2C(=O)[C]=C(OC2=[C]1)C1=[C][C]=[C][C]=[C]1)O)OS([O])([O])O                           | -8.6 |
| 5318267  | C1(=[C][C]=C2C(=O)C(=[C]OC2=[C]1)C1=[C][C]=C(C(=[C]1)O)O[C])O[C]1O[C]([C]([C]([C]1O)O)O)[C]O    | -8.6 |
| 5270553  | O1C2=C([C]=C([C]=[C]2)C(=O)O)C(=O)[C][C]1C1=[C][C]=[C][C]=[C]1                                  | -8.6 |
| 3062797  | O1[C]=C(C(=O)C2=C1[C]=C([C]=[C]2)O[C]([C])C(=O)O)C1=[C][C]=[C][C]=[C]1                          | -8.6 |
| 725376   | O1C(=[C]C(=O)C2=C1[C]=[C]C(=[C]2)OC(=O)[C])C1=[C][C]=C([C]=[C]1)O[C]                            | -8.6 |
| 467492   | O1C(=[C]C(=O)C2=C1[C]=C([C]=C2OC(=O)[C])OC(=O)[C])C1=[C][C]=[C][C]=[C]1                         | -8.6 |
| 466293   | ClC1=[C]c2c([C]=[C]1)oc(c(c2=O)O)C1=[C][C]=C([C]=[C]1)O[C]                                      | -8.6 |
| 462699   | O1C2=[C][C]=C([C]=C2C(=O)[C][C]1C1=[C][C]=C([C]=[C]1)O)O                                        | -8.6 |
| 368925   | O1C2=C(C(=[C]C(=C2[C][C]=C([C])([C])O)O)C(=O)[C]([C]1C1=[C][C]=C([C]=[C]1)O)O                   | -8.6 |
| 227445   | o1c(c(c(=O)c2[C]=C([C])[C]=[C]c12)O)C1=[C][C]=[C][C]=[C]1                                       | -8.6 |
| 182342   | O1C2=[C][C]=C3C(=O)C(=[C]OC3=C2[C]=[C]C1([C])([C])C1=[C]C2=C([C]=[C]1)O[C]O2                    | -8.6 |
| 118907   | O1C(=[C]C(=O)C2=C([C]=C([C]=C12)O[C]C(=O)O[C][C])O[C]C(=O)O[C][C])C1=[C][C]=[C][C]=[C]1         | -8.6 |
| 11912    | C1(=[C][C]=C2C(=O)[C]=C(OC2=[C]1)C1=[C][C]=[C][C]=[C]1)O[C][C][C]N([C])[C]                      | -8.6 |
| 13908069 | o1c(c(c(=O)c2C(=[C]C(=[C]c12)O[C][C]=C([C])([C])O)O)C1=[C][C]=C(C(=[C]1)O)O)[C]                 | -8.5 |
| 7        |                                                                                                 |      |
| 13482126 | O1[C]2[C]C3=[C][C]=[C][C]=C3O[C@]12C1=[C][C]=[C][C]=[C]1                                        | -8.5 |
| 8        |                                                                                                 |      |

|               |                                                                                              |      |
|---------------|----------------------------------------------------------------------------------------------|------|
| 13306495<br>3 | o1c(c(c(=O)c2C(=[C][C]=[C]c12)[C]C#[C])N)C1=[C][C]=[C][C]=[C]1                               | -8.5 |
| 13251736<br>6 | O1C(=[C]C(=O)C2=C1C(=C(C(=[C]2)O)O[C]))/[C]=C(\[C])/[C]O)C1=[C][C]=C([C]=[C]1)O[C]           | -8.5 |
| 12983450<br>7 | O1C2=[C]C(=[C]C(=C2C(=O)[C][C]1C1=[C][C]=C([C]=[C]1)OC(=O)[C])O[C])OC(=O)[C]                 | -8.5 |
| 12982239<br>5 | Clc1c(c(c2C(=O)[C]=C(Oc12)C1=[C][C]=C([C]=[C]1)OC(=O)[C])OC(=O)[C])OC(=O)[C])OC(=O)[C]       | -8.5 |
| 12982236<br>1 | O1C(=[C]C(=O)C2=C1C(=C(C(=[C]2)OC(=O)[C])OC(=O)[C])N)C1=[C][C]=[C][C]=[C]1                   | -8.5 |
| 10257793<br>2 | C1(=[C]C2=C(C(=[C]1)O)C(=O)[C]=C(O2)C1=[C][C]=C([C]=[C]1)O)OS([C])([O])[O]                   | -8.5 |
| 10200537<br>9 | C1(=[C]C(=O)C2=C(C(=C([C]=C2O[C])O[C])C2=[C][C]N([C])[C][C]2)O1)C1=[C][C]=[C][C]=C1F         | -8.5 |
| 10200537<br>6 | C1(=[C]C(=O)C2=C(C(=C([C]=C2O[C])O[C])C2=[C][C]N([C])[C][C]2)O1)C1=[C][C]=[C][C]=C1Cl        | -8.5 |
| 10200304<br>5 | O1C2=[C]C(=[C][C]C2=[C]C(=[C]1)C1=C([C]=C2C(=[C]1)O[C]O2)O[C])O                              | -8.5 |
| 10168070<br>5 | C1(=[C]C2=C([C]=[C]1)C(=O)[C]=C(O2)C1=[C][C]=[C][C]=[C]1)C(=O)[C]Br                          | -8.5 |
| 10164301<br>0 | O1C2=C(C(=[C]C(=C2[C][C]=C([C])[C])O)O)C(=O)[C]([C]1C1=[C][C]=C([C]=[C]1)O)O                 | -8.5 |
| 10144052<br>1 | o1c2[C]=C([C]=C(c2c(=O)c(c1C1=[C][C]=C(C(=[C]1)[C][C](C(=[C])[C])O)O)O)O                     | -8.5 |
| 10136776<br>6 | O1C2=C(C(=[C]C(=C2C(=O)[C][C]1C1=[C][C]=C([C]=[C]1)O)O)[C]/[C]=C(\[C])/[C]O                  | -8.5 |
| 10121375<br>9 | O1[C]=C(C(=O)C2=C1[C]=C([C]=C2O)O)C1=C([C]=C(C(=[C]1)[C][C]=C([C])[C])O[C])O                 | -8.5 |
| 10110115<br>3 | C1(=C(C(=C2C(=[C]1)OC(=[C]C2=O)C1=[C][C]=[C][C]=[C]1)O)O[C])O[C]1O[C]([C]([C]([C]1O)O)O)[C]O | -8.5 |
| 90753092      | o1c(c(c(=O)c2=C([C])C(=C([C])[C]=c12)[C])O)C1=[C][C]=[C][C]=[C]1                             | -8.5 |

|          |                                                                                               |      |
|----------|-----------------------------------------------------------------------------------------------|------|
| 69279473 | O1C2=C([C]=C([C]=[C]2)[C][C][C][C])C(=O)[C]([C]1C1=[C][C]=[C][C]=[C]1)O                       | -8.5 |
| 54512651 | O1C2=[C][C]=[C][C]=C2C(=O)/C(=[C]\N)/[C]1C1=[C][C]=[C][C]=[C]1                                | -8.5 |
| 53747690 | C1(=[C]C2=C(C(=[C]1)O)C(=O)[C]=C(O2)C1=[C][C]=[C][C]=[C]1)C(=O)[C]Br                          | -8.5 |
| 53247945 | C1(=[C][C]=C([C]=[C]1)[C]1[C]C(=O)C2=C([C]=[C][C]=[C]2)O1)O[C]1O[C]([C]([C]([C]1O)O)O[C])[C]O | -8.5 |
| 49800274 | O1C(=[C]C(=O)C2=C1C(=C([C]=C2O[C])O[C])C1=[C][C]N([C])[C][C]1)C1=[C][C]=[C][C]=[C]1           | -8.5 |
| 44382543 | C1(=C([C]=C(C2=C1OC(=[C]C2=O)C1=[C][C]=[C][C]=[C]1)O[C])O[C])C(F)(F)F                         | -8.5 |
| 44380969 | O1C(=[C]C(=O)C2=C([C]=C(C(=C12)N[C][C][C]([C])O)O)C1=[C][C]=[C][C]=[C]1                       | -8.5 |
| 44380895 | O1C(=[C]C(=O)C2=C([C]=C(C(=C12)N[C][C]([C])O)O)C1=[C][C]=[C][C]=[C]1                          | -8.5 |
| 44265561 | C1(=[C]C(=O)C2=C(C(=C([C]=C2O)O)C2=[C][C]N([C])[C][C]2)O1)C1=[C][C]=C(Cl)[C]=[C]1             | -8.5 |
| 44265528 | C1(=[C]C(=O)C2=C([C]=C(C(=C2O1)C1=[C][C]N([C])[C][C]1)O)O)C1=[C][C]=[C][C]=C1Br               | -8.5 |
| 44265522 | O1C(=[C]C(=O)C2=C1C(=C([C]=C2O)O)C1=[C][C]N([C])[C][C]1)C1=[C][C]=[C][C]=[C]1                 | -8.5 |
| 44258693 | O1C2=C(c3c([C]=C2O[C])c(=O)c(c(o3)C2=[C][C]=C([C]=[C]2)O)O[C])[C]=[C]C1([C])[C]               | -8.5 |
| 42607869 | O1C2=C(C(=[C]C(=C2C(=O)[C][C]1C1=[C][C]=[C][C]=[C]1)O)O)[C]/[C]=C(\[C])/[C]O                  | -8.5 |
| 25201019 | O1C2=C(C(=[C]C(=[C]2)O)[O])C(=O)[C][C]1C1=[C][C]=C([C]=[C]1)O[C]                              | -8.5 |
| 25058575 | C1(=C([C]=C(C(=[C]1)O[C])O[C][C]=C([C])O[C])C1=[C]OC2=C(C1=O)C(=[C]C(=[C]2)O[C])O[C]          | -8.5 |
| 21325058 | O1C2=C([C]=C([C]=[C]2)C(=O)O[C])C(=O)[C][C]1C1=[C][C]=[C][C]=C1N(=O)=O                        | -8.5 |
| 14791391 | O1C2=C([C]=[C]C(=[C]2)O)C(=O)[C]=C1C1=[C][C]=C([C]=[C]1)N(=O)=O                               | -8.5 |
| 14033984 | O1C2=C([C]=c3c(=O)c(c(oc3=C2[C]=[C]C1([C])[C])C1=[C][C]=[C][C]=[C]1)O[C])O[C]                 | -8.5 |
| 13432335 | O1C(=[C]C(=O)C2=C([C])[C]=C([C])[C]=C12)C1=[C][C]=[C][C]=[C]1                                 | -8.5 |
| 13393782 | [C]1([C]C(=O)C2=[C][C]=[C][C]=C2O1)C1=[C][C]=[C]C(=[C]1)F                                     | -8.5 |
| 12753173 | [C]1([C]C(=O)C2=[C][C]=[C][C]=C2O1)C1=C(Cl)[C]=C([C]=[C]1)Cl                                  | -8.5 |
| 12049385 | O1C(=[C][C]=C2[C][C]=C([C]=C12)N([C][C])[C][C])C1=[C][C]=C([C]=[C]1)N([C])[C]                 | -8.5 |
| 12043066 | C1(=[C]C(=O)C2=C([C]=C(C(=C2O1)[C]1[C][C][C][C]1O)O)O)C1=[C][C]=[C][C]=C1Cl                   | -8.5 |
| 11683340 | C1(=[C]C2=C([C]=[C]1)C(=O)[C]=C(O2)C1=[C]C(=[C]C(=[C]1)O[C])O[C])O[C][C](O)[C]NC([C])([C])[C] | -8.5 |
| 11186717 | O1C2=C([C]=C([C]=C2[C]=[C]C1([C])[C])C1=[C]OC2=C([C]=[C]C(=[C]2)O)C1=O)O                      | -8.5 |
| 10957930 | O1C2=[C][C]=[C][C]=C2C(=O)/C(=[C]/C2=[C][C]=[C][C]=[C]2)/[C]1C1=[C][C]=[C][C]=[C]1            | -8.5 |
| 10848398 | O1C2=C([C]=[C]C(=[C]2)O)C(=O)[C]=C1C1=[C][C]=C([C])[C]=[C]1                                   | -8.5 |
| 10761522 | [C]1([C]C(=O)C2=C([C]=C([C]=C2O)O)O1)C1=[C]C(=C2OC([C]=[C]C2=[C]1)([C])[C])O[C]               | -8.5 |
| 10708856 | C1(=[C]C(=O)C2=C([C]=[C][C]=[C]2)O1)C1=[C][C]=C([C]=[C]1)[C]N=C=S                             | -8.5 |

|               |                                                                                                  |      |
|---------------|--------------------------------------------------------------------------------------------------|------|
| 10018499      | O1c2c(c(c([C])c(c2C(=O)[C][C@]1(C1=[C][C]=[C][C]=[C]1)O)O)[C]=O                                  | -8.5 |
| 6116651       | O1C2=[C][C]=[C][C]=C2C(=O)/C(=[C]\C2=[C][C]=N[C]=[C]2)/[C]1C1=[C][C]=[C][C]=[C]1                 | -8.5 |
| 5378945       | O1[C]=C(C(=O)C2=C(C(=C([C]=C12)O)[C]/[C]=C(\[C])/[C]O)O)C1=[C][C]=C([C]=[C]1)O                   | -8.5 |
| 5322065       | O1C2=C([C]=[C]C(=[C]2)O)C(=O)[C]=C1C1=[C]C(=C([C]=[C]1)O)O                                       | -8.5 |
| 5321987       | [C]1(C2=C([C]=[C]C(=[C]2)O[C])O[C][C]1C1=[C]C(=[C]C(=C1O)O[C])/[C]=[C]/C(=O)O)OS([O])([O])O      | -8.5 |
| 5317300       | C1(=C(C(=C([C]=[C]1)O)[C][C]=C([C])[C])O)C1=[C]OC2=C(C1=O)[C]=[C]C(=[C]2)O                       | -8.5 |
| 5272799       | O1C2=[C][C]=[C][C]=C2C(=O)[C][C]1C1=[C][C]=C([C]=[C]1)C1=N[C][C]O1                               | -8.5 |
| 5270543       | FC1=[C]C2=C([C]=[C]1)C(=O)[C][C](O2)C1=[C][C]=[C][C]=[C]1                                        | -8.5 |
| 5049148       | O1c2c(c(c3C(=O)C(=[C]Oc3c2[C]=[C]C1([C])[C])C1=[C]C2=C([C]=[C]1)O[C]O2)O[C])O[C]                 | -8.5 |
| 746742        | C1(=[C]OC2=C([C]=[C]C(=[C]2)O[C]([C])[C])C1=O)C1=[C][C]=C(F)[C]=[C]1                             | -8.5 |
| 630804        | O1[C]=C(C(=O)C2=C1C(=C([C]=C2OC(=O)[C])OC(=O)[C])[C][C]=C([C])[C])C1=[C][C]=C([C]=[C]1)OC(=O)[C] | -8.5 |
| 342294        | O1C2=[C]C(=[C]C(=C2[C][C][C]1C1=[C][C]=[C][C]=[C]1)O[C])O                                        | -8.5 |
| 188424        | O1C2=C(C(=[C]C(=[C]2)O)O[C])C(=O)[C][C]1C1=[C][C]=C([C]=[C]1)O                                   | -8.5 |
| 187093        | O1C2=[C]C(=[C][C]=C2C(=O)[C][C]1C1=[C]C(=C([C]=[C]1)O[C])O)O                                     | -8.5 |
| 185027        | O1C2=C([C]=[C]C(=C2/[C]=[C]/C(=[C])[C])O[C])C(=O)[C][C]1C1=[C][C]=[C][C]=[C]1                    | -8.5 |
| 126392        | O1C(=[C]C(=O)C2=C1C(=[C][C]=[C]2)[C]C(=O)O[C]N([C])[C])C1=[C][C]=[C][C]=[C]1                     | -8.5 |
| 8395          | O1C(=[C]C(=O)C2=[C][C]=C([C]=C12)O[C]C(=O)O[C][C])C1=[C][C]=[C][C]=[C]1                          | -8.5 |
| 1889          | O1C2=[C]C(=[C][C]=C2C(=O)[C][C]1C1=[C][C]=C([C]=[C]1)O)O                                         | -8.5 |
| 12983023<br>9 | C1(=[C]C(=C([C]=C1c1c(c(=O)c2=C([C]=C([C]=c2o1)O)O)O)O)S(=O)(=O)C1=[C][C]=C([C]=[C]1)[C]         | -8.4 |
| 12982555<br>6 | o1c2=[C]C(=C(C(=c2c(=O)c(c1C1=[C]C(=C([C]=[C]1)O)/[C]=[C]/C(=[C])[C])O[C])O)O[C])O               | -8.4 |
| 12981335<br>4 | O1C2=[C]C(=[C][C]=C2C(=O)[C][C]1C1=[C]C(=C(C(=[C]1)O)O)O)O[C]                                    | -8.4 |
| 12978128<br>8 | O1[C]=C(C(=C2[C]=[C][C]=[C][C]12)[N]O)C1=[C][C]=[C][C]=[C]1                                      | -8.4 |
| 10206428<br>8 | O1C(=[C]C(=O)C2=C1C(=[C][C]=[C]2)/[C]=[C]/[C])C1=[C][C]=[C][C]=[C]1                              | -8.4 |
| 10201716<br>5 | O1C(=[C]C(=O)C2=C([C]=C(C(=C12)[C][C]C(=[C])[C])O)O)C1=[C][C]=[C][C]=[C]1                        | -8.4 |

|               |                                                                                                            |      |
|---------------|------------------------------------------------------------------------------------------------------------|------|
| 10176363<br>2 | C1(=C(C2=C([C]=C1O)O)[C]=C(C2=O)C1=[C][C]=C([C]=[C]1)O)O)[C]C([C])([C])O                                   | -8.4 |
| 10168070<br>6 | C1(=C2C(=[C][C]=C1C(=O)[C]Br)C(=O)[C]=C(O2)C1=[C][C]=[C][C]=[C]1)C(=O)[C]Br                                | -8.4 |
| 10162120<br>6 | O1C2=[C][C]=C([C])[C]=C2C(=O)[C][C]1C1=[C][C]=C([C]=[C]1)N([C])[C]                                         | -8.4 |
| 10159128<br>0 | C1(=[C][C]=C2C(=C1O[C])C(=O)[C]=C(O2)C1=[C][C]=C(C(=[C]1)O[C])O)O[C][C][C][C][C]                           | -8.4 |
| 10149923<br>5 | C1(=[C]C(=C(C(=[C]1)O[C])O[C]([C]O)[C](C1=[C][C]=C([C]=[C]1)O)O)O[C])[C]1OC2=C(C(=[C]C(=[C]2)O)O)C(=O)[C]1 | -8.4 |
| 10102840<br>4 | O1C(=[C]C(=O)C2=C1C(=C([C]=C2O)O)N[C]([C])([C])C1=[C][C]=[C][C]=[C]1                                       | -8.4 |
| 10102840<br>3 | O1C(=[C]C(=O)C2=C1[C]=C(C(=C2O)N[C][C]=[C])O)C1=[C][C]=[C][C]=[C]1                                         | -8.4 |
| 10094338<br>5 | ClC1=C(C(=[C]C(=[C]1)C1=[C]C(=O)C2=[C][C]=[C][C]=C2O1)S(=O)(=O)Cl)O[C]                                     | -8.4 |
| 87771765      | [C]1(C(=O)C2=C([C]=[C][C]=[C]2)O[C@]1(C1=[C][C]=[C][C]=[C]1)C(=O)C1=[C]C(=C(C(=[C]1)O)O)O)OS([O])([O])O    | -8.4 |
| 73829901      | O1C2=[C]C3=C(C(=C2C(=O)[C]([C]1C1=[C][C]=[C][C]=[C]1)O)O[C])O[C]O3                                         | -8.4 |
| 71621986      | C1(=C([C]=C2C(=[C]1)O[C]=C(C2=O)C1=[C][C]=C([C]=[C]1)O)O[C])O[C]1O[C]([C]([C]([C]1O)O)O[C])[C]O            | -8.4 |
| 70350763      | O1C2=[C][C]=[C][C]=C2C(=O)/C(=[C]\O)/[C]1C1=[C][C]=[C][C]=[C]1                                             | -8.4 |
| 66783912      | C1(=[C]C(=O)C2=C(C3=C([C]=C2O1)O[C]O3)O)C1=[C][C]=C([C]=[C]1)O[C][C]N([C][C])[C][C]                        | -8.4 |
| 57340187      | O1C2=[C]C(=[C][C]=C2C(=O)[C]=C1C1=[C][C]=C([C]=[C]1)/[C]=[C]/C(=O)O)O                                      | -8.4 |
| 53398699      | C1(=[C]C2=C([C]=[C]1)C(=O)C(=[C]O2)C1=[C][C]=C([C]=[C]1)O)O[C]1O[C]([C]([C]([C]1O)O)O)[C]OC(=O)[C]         | -8.4 |
| 44265523      | C1(=[C]C(=O)C2=C(C(=C([C]=C2O)O)C2=[C][C]N([C])[C][C]2)O1)C1=C(I)[C]=[C][C]=[C]1                           | -8.4 |
| 44257645      | O1C2=[C]C(=C3C(=O)[C]=C(OC3=C2[C]([C]1)[C](C([C])([C])OC(=O)[C])OC(=O)[C])C1=[C][C]=[C][C]=[C]1)O[C]       | -8.4 |
| 44257318      | O1[C]=C(C(=O)C2=C1C(=C([C]=C2O)O)[C]/[C]=C([C])/[C]O)C1=[C][C]=C([C]=C1O)O                                 | -8.4 |
| 25022738      | O1C2=[C]C(=C([C]=C2C(=O)[C][C]1C1=[C][C]=[C][C]=[C]1)O[C])O                                                | -8.4 |
| 23644938      | c1(c(c(=O)c2[C]=[C]C(=[C]c2o1)O[C])C1=[C][C]=[C][C]=[C]1)SC1=N[C]=NN1                                      | -8.4 |
| 21270125      | C1(=[C]OC2=C([C]=C(C(=[C]2)O)O)C1=O)C1=[C][C]=C(Cl)[C]=[C]1                                                | -8.4 |
| 18324915      | c1(c(c(=O)c2[C]=[C][C]=[C]c2o1)C1=[C]C(=[C][C]=[C]1)F)C1=[C][C]=C([C]=[C]1)S(=O)(=O)[C]                    | -8.4 |

|          |                                                                                                  |      |
|----------|--------------------------------------------------------------------------------------------------|------|
| 16215025 | C1(=C2C(=C(C(=[C]1)O[C])O[C])O[C]([C]C2=O)C1=[C][C]=[C][C]=[C]1)O[C]1O[C]([C]([C]([C]1O)O)O)[C]O | -8.4 |
| 15491286 | o1c(c(c(=O)c2c(c(c(c12)O)O[C])O[C])O[C])O[C]C(=[C]([C])O)O)C1=[C]C(=C([C]=[C]1)O)O[C]            | -8.4 |
| 15485967 | O1C2=C(C(=C(C(=[C]2)O[C])O[C])O[C])O[C]C(=[C]([C])O)C(=O)[C]C1C1=[C][C]=C([C]=[C]1)O             | -8.4 |
| 15458309 | O1C2=C(C(=[C][C]=C2C(=O)[C]C1C1=[C][C]=C([C]=[C]1)O[C])O[C])O[C]                                 | -8.4 |
| 15385487 | O1C2=[C]C(=[C][C]=C2C(=O)[C]C1C1=[C][C]=C(C(=[C]1)O[C])O)O                                       | -8.4 |
| 15301053 | O1[C]=C(C(=O)C2=C1[C]=C([C]=C2O)O)C1=[C]C2=C([C]=[C]1)O[C]O2                                     | -8.4 |
| 14885875 | O1C2=[C]C(=[C]C(=C2[C][C]C1C1=[C][C]=[C][C]=[C]1)O[C])O                                          | -8.4 |
| 12813783 | O1C2=C([C]=[C][C]=[C]2)C(=O)[C]=C1C1=[C]C(=[C][C]=[C]1)[C]                                       | -8.4 |
| 12813780 | O1C2=C([C]=[C][C]=[C]2)C(=O)[C]C1C1=[C]C(=[C][C]=[C]1)[C]                                        | -8.4 |
| 12407921 | O1C2=C([C]=C([C]=[C]2)C(=O)O)C(=O)[C]=C1C1=[C][C]=C([C]=[C]1)O[C][C]O                            | -8.4 |
| 11739635 | C1(=[C]C(=C(C(=[C]1)O)O[C])O[C])O[C]C(=[C]([C])O)C1=[C]OC2=[C]C(=[C][C]=C2C1=O)O                 | -8.4 |
| 11704980 | o1c2[C]=[C][C]=[C]c2c(=O)c(c1C1=[C]C(=C(C(=[C]1)O[C])O[C])O[C])C(=O)C1=[C][C]=C([C]=[C]1)O[C]    | -8.4 |
| 11583077 | C1(=[C][C]=C2C(=O)[C]=C(OC2=[C]1)C1=[C]C(=C(C(=[C]1)O[C])O[C])O[C])O[C]([C](O)[C]N[C]([C])[C]    | -8.4 |
| 11494111 | C1(=[C]OC2=[C]C(=[C]C(=C2C1=O)O)O)C1=[C][C]=C(C2=C1[C][C]C(O2)([C])[C])O                         | -8.4 |
| 11149874 | O1C2=[C][C]=[C][C]=C2C(=O)[C]C1C1=[C][C]=C([C]=[C]1)N(=O)=O                                      | -8.4 |
| 10980660 | O1C2=C(C(=[C]C(=C2C(=O)[C]C1C1=[C][C]=[C][C]=[C]1)O)O[C])/[C]=[C]/C(=O)[C]                       | -8.4 |
| 10901472 | o1c2=[C][C]=[C][C]=c2c(=O)c(c1C1=[C][C]=C([C]=[C]1)[C]=[C])O                                     | -8.4 |
| 10659060 | O1C2=C([C]=[C][C]=[C]2)C(=O)[C]=C1C1=[C]C(=[C][C]=[C]1)[C]C#N                                    | -8.4 |
| 10357090 | C1(=[C][C]=[C]C2=C1O[C]=C(C2=O)C1=[C][C]=[C][C]=[C]1)O[C][C]1O[C]1                               | -8.4 |
| 10244935 | O1C(=[C]C(=O)C2=C(C(=C([C]=C12)O)N[C][C][C])O)C1=[C][C]=[C][C]=[C]1                              | -8.4 |
| 10108482 | C1(=[C][C]=C2C(=O)C(=[C]OC2=[C]1)C1=[C][C]=[C][C]=[C]1)O[C][C]1O[C]1                             | -8.4 |
| 9883305  | o1c(c(c(=O)c2=C(C3=C([C]=c12)O[C]O3)O)O)C1=[C][C]=C([C]=[C]1)O                                   | -8.4 |
| 5393156  | O1C(=[C]C(=O)C2=C([C])[C]=C([C]=C12)O)C1=[C][C]=[C][C]=[C]1                                      | -8.4 |
| 5391140  | O1C(=[C]C(=O)C2=[C][C]=C([C]=C12)O)C1=[C]C(=[C][C]=[C]1)O                                        | -8.4 |
| 5378171  | O1C(=[C]C(=O)C2=C([C]=C([C])[C]=C12)O)C1=[C][C]=C([C]=[C]1)O[C]                                  | -8.4 |
| 5320693  | O1C2=[C]C(=[C][C]=C2C(=O)[C]=C1C1=[C][C]=C([C]=[C]1)O[C])O                                       | -8.4 |
| 5317480  | O1[C]=C(C(=O)C2=C1C(=C([C]=C2O)O)[C][C]=C([C])[C])C1=[C][C]=C([C]=[C]1)O                         | -8.4 |
| 5281670  | o1c2=[C]C(=[C]C(=c2c(=O)c(c1C1=C([C]=C([C]=[C]1)O)O)O)O)O                                        | -8.4 |
| 5281601  | O1C(=[C]C(=O)C2=C1[C]=C([C]=C2O)O[C])C1=[C][C]=C([C]=[C]1)O[C]                                   | -8.4 |

|               |                                                                                              |      |
|---------------|----------------------------------------------------------------------------------------------|------|
| 5272796       | O1C2=C([C]=[C][C]=[C]2)C(=O)[C]=C1C1=[C][C]=C([C]=[C]1)C(=O)O                                | -8.4 |
| 2734580       | O1C2=C([C]=C([C]=[C]2)O)C(=O)[C][C]1C1=[C][C]=[C][C]=[C]1                                    | -8.4 |
| 1232441       | O1C2=C([C]=[C][C]=[C]2)[C][C][C]1C1=[C][C]=[C][C]=[C]1                                       | -8.4 |
| 688859        | O1C2=[C][C]=[C][C]=C2C(=O)[C][C]1C1=[C][C]=C([C]=[C]1)O                                      | -8.4 |
| 688857        | O1C2=C([C]=[C]C(=[C]2)O)C(=O)[C][C]1C1=[C][C]=[C][C]=[C]1                                    | -8.4 |
| 688835        | o1c2[C]=[C]C(=[C]c2c(=O)c(c1C1=[C]C(=[C][C]=[C]1)O[C])O)O[C]                                 | -8.4 |
| 676310        | O1C(=[C]C(=O)C2=[C][C]=C(C(=C12)O)O)C1=[C]C(=[C][C]=[C]1)O                                   | -8.4 |
| 676309        | O1C(=[C]C(=O)C2=C1C(=C([C]=[C]2)O)O)C1=[C][C]=[C][C]=C1O                                     | -8.4 |
| 626146        | o1c([C])c(c(=O)c2[C]=[C]C(=[C]c12)O[C][C]=[C])C1=[C][C]=[C][C]=[C]1                          | -8.4 |
| 466268        | O1C(=[C]C(=O)C2=[C][C]=C([C]=C12)O[C])C1=[C][C]=[C][C]=[C]1                                  | -8.4 |
| 373261        | O1C2=C(C(=[C]C(=[C]2)O)O)C(=O)[C][C]1C1=[C]C(=C([C]=[C]1)O)O                                 | -8.4 |
| 242065        | [C]1([C]C(=O)C2=[C][C]=[C][C]=C2O1)C1=[C][C]=C(Cl)[C]=[C]1                                   | -8.4 |
| 226342        | O1C2=[C][C]=[C][C]=C2C(=O)[C][C]1C1=[C][C]=C(C(=[C]1)O[C])O                                  | -8.4 |
| 165506        | O1C2=[C][C]=[C][C]=C2C(=O)[C][C]1C1=[C][C]=C([C]=[C]1)O                                      | -8.4 |
| 145726        | O1C2=C([C]=[C][C]=[C]2)C(=O)[C]=C1C1=[C]C(=C([C]=[C]1)O)O                                    | -8.4 |
| 97860         | O1C2=C([C]=C([C]=[C]2)O[C])C(=O)[C][C]1C1=[C][C]=[C][C]=[C]1                                 | -8.4 |
| 55750         | C1(=[C][C]=[C]C2=C1OC(=[C]C2=O)C1=[C][C]=[C][C]=[C]1)[C]C(=O)O[C][C]N([C][C])[C][C]          | -8.4 |
| 27443         | o1c(c([C])c(=O)c2=[C]C(=[C][C]=c12)[C]N([C][C])[C][C])C1=[C][C]=[C][C]=[C]1                  | -8.4 |
| 20489         | O1C(=[C]C(=O)C2=C([C]=C(C(=C12)O)O[C])O)C1=[C][C]=[C][C]=[C]1                                | -8.4 |
| 1890          | O1C2=C([C]=[C]C(=[C]2)O)C(=O)[C][C]1C1=[C][C]=[C][C]=[C]1                                    | -8.4 |
| 13253615<br>8 | O1C(=[C]C(=O)C2=C1[C]=C([C]=C2OC(=O)[C]=[C])OC(=O)[C]=[C])C1=[C][C]=C([C]=[C]1)OC(=O)[C]=[C] | -8.3 |
| 13247200<br>6 | o1c2[C]=C([C])[C]=C(c2c(=O)c([C])c1C1=[C][C]=C([C])[C]=[C]1)O                                | -8.3 |
| 12986429<br>4 | O1C2=C([C]=[C][C]=C2C(=O)[C][C]1C1=[C][C]=C([C]=[C]1)O)O[C]                                  | -8.3 |
| 12985216<br>0 | C1(=c2c(=[C][C]=[C]1)oc(c(c2=O)O)C1=[C][C]=[C][C]=[C]1)[C]1O[C]([C]([C]([C]1O)O)O)[C]O       | -8.3 |

|               |                                                                                                                         |      |
|---------------|-------------------------------------------------------------------------------------------------------------------------|------|
| 12983569<br>5 | O1C2=[C][C]=[C][C]=C2C(=O)[C@@]([C@]1(C1=[C][C]=[C][C]=[C]1)O)(c1c(=O)c2=[C][C]=[C][C]=c2oc1C1=[C][C]=[C][C]<br>=[C]1)O | -8.3 |
| 12982676<br>9 | S=C1C2=C([C]=[C][C]=[C]2)O[C]([C]1)C1=[C][C]=C([C])[C]=[C]1                                                             | -8.3 |
| 12982445<br>6 | O1C(=[C]C(=C2[C]C(=[C][C]=C12)[C]=O)[N]O)C1=[C][C]=[C][C]=[C]1                                                          | -8.3 |
| 12973022<br>2 | O1C(=[C]C(=O)C2=C1C(=[C]C(=[C]2)[C])C(=O)[C][C])C1=[C][C]=[C][C]=[C]1                                                   | -8.3 |
| 12968987<br>5 | O1C(=[C]C(=O)C2=C([C]=[C][C]=C12)OC(O)(O)O)C1=[C][C]=[C][C]=[C]1                                                        | -8.3 |
| 10236007<br>9 | O1C2=C(C3=C(C(=[C]2)O[C])C(=O)[C][C](O3)C2=[C][C]=[C][C]=[C]2)[C]([C](C1([C])[C])OC(=O)[C])OC(=O)[C]                    | -8.3 |
| 10215422<br>0 | O1C2=[C]C3=C(C(=O)[C]=C(O3)C3=[C][C]=C([C]=[C]3)O)C(=C2[C]([C]C1([C])[C])O)O                                            | -8.3 |
| 10209126<br>7 | O1C2=[C][C]=[C][C]=C2[C]([C][C]1C1=[C][C]=[C][C]=[C]1)[N]OC(=O)[C]                                                      | -8.3 |
| 10184348<br>4 | C1(=[C][C]=[C]C2=C1C(=O)[C]=C(O2)C1=[C][C]=C([C]=[C]1)O)O[C]1O[C]([C]([C]([C]1O)O)O[C])[C]O                             | -8.3 |
| 10168525<br>1 | C1(=[C][C]=C([C]=[C]1)C(=O)N[C][C]O)C1=[C]C(=O)C2=[C][C]=[C][C]=C2O1                                                    | -8.3 |
| 10168524<br>9 | C1(=[C][C]=C([C]=[C]1)C(=O)N[C][C]O)[C]1OC2=C([C]=[C][C]=[C]2)C(=O)[C]1                                                 | -8.3 |
| 10159199<br>8 | C1(=[C]C(=C2C(=O)[C]=C(OC2=C1O[C])C1=[C][C]=[C][C]=[C]1)O[C])O[C]1O[C]([C]([C]([C]1O)O)O)[C]O                           | -8.3 |
| 10149923<br>6 | C1(=C([C]=C([C]=C1O[C])C1=[C]C(=O)C2=C([C]=C([C]=C2O)O)O1)O[C])O[C]([C]O)[C](C1=[C][C]=C([C]=[C]1)O)O                   | -8.3 |
| 10102840<br>8 | O1C(=[C]C(=O)C2=C([C]=C(C(=C12)N[C][C][C]([C])[C])O[C])O[C])C1=[C][C]=[C][C]=[C]1                                       | -8.3 |
| 10102840<br>5 | O1C(=[C]C(=O)C2=C1C(=C([C]=C2O[C])O[C])N[C]([C])[C])C1=[C][C]=[C][C]=[C]1                                               | -8.3 |



|               |                                                                                                     |      |
|---------------|-----------------------------------------------------------------------------------------------------|------|
| 10091405<br>2 | C1(=[C][C]=C([C]=[C]1)c1c(c(=O)c2[C]=[C][C]=[C]c2o1)O)N1[C][C]O[C][C]O[C][C]O[C][C]O[C][C]1         | -8.3 |
| 89858365      | o1c(c(c(=O)c2C(=[C][C]=[C]c12)C(=O)[C])O)C1=[C][C]=[C][C]=[C]1                                      | -8.3 |
| 86236611      | C1(=[C][C]=C2C(=O)[C]=C(OC2=[C]1)C1=[C]C(=C([C]=[C]1)O[C])O[C])O[C][C]1O[C]1                        | -8.3 |
| 85751070      | [N](C1=C2C(=[C][C]=[C][C]2)OC(=[C]1)C1=[C][C]=[C][C]=[C]1)NC(=S)N                                   | -8.3 |
| 71762131      | O1C(=[C]C(=O)C2=C1C(=C([C]=[C]2)O)O[C])C1=[C][C]=[C][C]=[C]1                                        | -8.3 |
| 71621984      | C1(=[C]C(=C2C(=O)C(=[C]OC2=[C]1)C1=[C][C]=C([C]=[C]1)O)O)O[C]1O[C]([C]([C]([C]1O)O)O[C])[C]O        | -8.3 |
| 69234627      | O([C@@]1([C][C]C2=[C][C]=[C][C]=C2O1)C1=[C][C]=[C][C]=[C]1)[C]1O[C]([C]([C]([C]1O)O)O)[C]O          | -8.3 |
| 67114276      | o1c(c(c(=O)c2=C([C]=[C][C]=c12)C(=O)[C])C(=O)[C])C1=[C][C]=[C][C]=[C]1                              | -8.3 |
| 66650373      | C1(=[C][C]=[C]C2=C1C(=O)[C]=C(O2)C1=[C][C]=[C][C]=[C]1)[C]Br                                        | -8.3 |
| 66561376      | o1c(c(c(=O)c2c(c3c(c(c12)O[C])O[C]O3)O)O[C])C1=[C]C2=C([C]=[C]1)O[C]O2                              | -8.3 |
| 57409964      | C1(=[C]C(=C(C(=[C]1)[C][C](C(=[C])O)O)[C]/[C]=C(/[C])\)[C]O)c1oc2=[C]C(=C(C(=c2c(=O)c1O[C])O)O[C])O | -8.3 |
| 57340184      | C1(=[C]C(=O)C2=C([C]=C([C]=[C]2)O)O1)C1=[C][C]=C(F)[C]=[C]1                                         | -8.3 |
| 54553686      | O1C2=C([C]=[C][C]=[C]2)C(=O)[C][C]1C1=[C]C(=[C][C]=[C]1)C#N                                         | -8.3 |
| 53247999      | C1(=[C][C]=C([C]=[C]1)[C]1[C]C(=O)C2=[C][C]=[C][C]=C2O1)O[C]1O[C]([C]([C]([C]1O)O)O)[C]             | -8.3 |
| 53247946      | C1(=[C]C2=C([C]=[C]1)O[C]([C]C2=O)C1=[C][C]=C([C]=[C]1)O)O[C]1O[C]([C]([C]([C]1O)O)O[C])[C]O        | -8.3 |
| 45933941      | O1C2=[C][C]=[C][C]=C2C(=O)[C]=C1C1=[C]C(=[C]C(=[C]1)O)O                                             | -8.3 |
| 44380894      | O1C(=[C]C(=O)C2=C([C]=C(C(=C12)N[C][C][C])O)O)C1=[C][C]=[C][C]=[C]1                                 | -8.3 |
| 44259965      | o1c(c(c(=O)c2=C([C]=C(C(=c12)O)O[C])O)O)C1=[C][C]=C([C]=[C]1)O                                      | -8.3 |
| 44259864      | o1c(c(c(=O)c2c(c(c3c([C]=[C]O3)c12)O[C])O[C])O[C])C1=[C]C2=C([C]=[C]1)O[C]O2                        | -8.3 |
| 44258614      | O1c2c3C(=O)[C]=C(Oc3c(c(c2[C]=[C]C1([C])[C])O[C])O[C])C1=[C][C]=C(C(=[C]1)O[C])O[C]                 | -8.3 |
| 44258526      | O1C(=[C]C(=O)C2=C1[C]=C(C1=C2O[C]O1)O[C])C1=[C][C]=C2C(=[C]1)O[C]O2                                 | -8.3 |
| 42608071      | O1C2=C(C(=[C]C(=C2C(=O)[C][C]1C1=[C][C]=C([C]=[C]1)O)O)O[C])[C][C]=C([C])[C]                        | -8.3 |
| 42608069      | O1C2=C(C(=[C]C3=C2[C]=[C]C(O3)([C])[C])O[C])C(=O)[C][C]1C1=[C]C(=[C][C]=[C]1)O[C])O[C]              | -8.3 |
| 23644937      | c1(c(c(=O)c2[C]=[C]C(=[C]c2o1)O[C])C1=[C][C]=[C][C]=[C]1)SC1=N[C]=[C]N1[C]                          | -8.3 |
| 20452436      | O1C2=C([C]=[C][C]=[C]2)[C][C][C]1C1=[C][C]=C([C]=[C]1)O                                             | -8.3 |
| 20394007      | C1(=[C][C]=C2C(=O)C(=[C]OC2=[C]1)C1=[C][C]=[C][C]=[C]1)O[C]([C])[C][C]                              | -8.3 |
| 20301086      | O1C2=[C][C]=[C][C]=C2C(=O)C(=[C])[C]1C1=[C]C(=[C][C]=[C]1)N(=O)=O                                   | -8.3 |
| 15896301      | O1C(=[C]C(=O)c2c(c(c(c12)O[C])O[C])O[C])O)C1=[C][C]=[C]C(=C1O)O[C]                                  | -8.3 |

|          |                                                                                                   |      |
|----------|---------------------------------------------------------------------------------------------------|------|
| 14034288 | O1C2=C(C(=[C]C(=C2O)O[C])O)C(=O)[C][C]1C1=[C][C]=[C][C]=C1O                                       | -8.3 |
| 12674946 | o1c2=[C][C]=[C][C]=c2c(=O)c(c1C1=[C][C]=[C][C]=[C]1)C(=O)O                                        | -8.3 |
| 12114693 | O1[C]([C]C(=O)C2=C1C(=C([C]=C2O)O)C([C])([C])[C]=[C])C1=[C][C]=C([C]=[C]1)O                       | -8.3 |
| 12098358 | O1C2=C(C(=[C]C(=C2O[C])O[C])O)C(=O)[C][C]1C1=[C][C]=[C][C]=C1O                                    | -8.3 |
| 11661570 | C1(=[C]C2=C([C]=[C]1)C(=O)[C]=C(O2)C1=[C]C(=[C]C(=[C]1)O[C])O[C])O[C][C](O)[C]N[C]([C])[C]        | -8.3 |
| 11382711 | C1(=C(C2=C([C]=C1O)O[C]=C(C2=O)C1=[C][C]=C([C]=[C]1)O)O)[C][C]C([C])([C])O                        | -8.3 |
| 11246736 | c1(c(c(=O)c2[C]=[C]C(=[C]c2o1)O[C])C1=[C][C]=C([C]=[C]1)O[C])S[C]C1=[C][C]=N[C]=[C]1              | -8.3 |
| 11176755 | c1(c(c(=O)c2[C]=[C]C(=[C]c2o1)O[C])C1=[C][C]=C([C]=[C]1)[C])S[C]C1=[C][C]=N[C]=[C]1               | -8.3 |
| 10904774 | C1(=C([C]=C(C2=C1O[C]=C(C2=O)C1=C([C]=C([C]=[C]1)O)O)O)[C][C]C([C])([C])O                         | -8.3 |
| 10902653 | C1(=[C]C(=O)C2=[C][C]=[C][C]=C2O1)C1=[C][C]=C([C]=[C]1)S(=O)(=O)[C]                               | -8.3 |
| 10777811 | O1C2=[C][C]=[C][C]=C2C(=O)[C]=C1C1=[C][C]=C([C]=[C]1)[C]C#N                                       | -8.3 |
| 10742453 | O1[C]([C]C(=O)C2=C1C(=C([C]=C2O)O)[C][C](C(=[C])[C])[C][C]C([C])([C])O)C1=C([C]=C([C]=[C]1)O)O[C] | -8.3 |
| 10736576 | O1C2=[C]C3=C(C(=O)C(=[C]O3)C3=[C][C]=C([C]=[C]3)O)C(=C2[C]=[C]C1([C])[C])O[C]                     | -8.3 |
| 10498462 | O1C2=C(C(=C(C(=[C]2)O)C([C])([C])[C]=[C])O)C(=O)[C][C]1C1=[C]C(=[C]=[C]1)O)O                      | -8.3 |
| 10335613 | O1C(=[C]C(=O)C2=C(C(=C([C]=C12)O)N[C]([C])[C])O)C1=[C][C]=[C][C]=[C]1                             | -8.3 |
| 10022760 | C1(=[C]c2c(C(=[C]1)O)c(=O)c(c(o2)C1=[C]C(=C([C]=[C]1)O)O)OS([O])([O])O                            | -8.3 |
| 9813808  | O1C2=[C][C]=[C][C]=C2[C][C]([C]1C1=[C]C(=[C]=[C]1)O)O)O                                           | -8.3 |
| 9562299  | [N]([C]1C2=[C][C]=[C][C]=C2O[C]([C]1)C1=[C][C]=[C][C]=[C]1)NC(=S)N                                | -8.3 |
| 5321859  | O1C(=[C]C(=O)c2c(c(c(c12)O[C])O)O[C])O)C1=[C]C(=[C]=[C]1)O)O                                      | -8.3 |
| 5317435  | O1C2=[C]C(=[C][C]=C2C(=O)[C]([C]1C1=[C][C]=C(C(=[C]1)O)O)O)O                                      | -8.3 |
| 5316733  | O1C2=[C]C(=C(C(=C2C(=O)[C][C]1C1=[C][C]=[C][C]=[C]1)O)O[C])O                                      | -8.3 |
| 5282073  | O1C(=[C]C(=O)C2=[C][C]=C([C]=C12)O)C1=[C][C]=C([C]=[C]1)O                                         | -8.3 |
| 5281894  | O1C(=[C]C(=O)C2=[C][C]=C([C]=C12)O)C1=[C][C]=[C][C]=[C]1                                          | -8.3 |
| 5281674  | O1C(=[C]C(=O)C2=C([C]=C(C(=C12)O)O)O)C1=[C][C]=[C][C]=[C]1                                        | -8.3 |
| 5280445  | O1C(=[C]C(=O)C2=C1[C]=C([C]=C2O)O)C1=[C][C]=C(C(=[C]1)O)O                                         | -8.3 |
| 3826106  | O1C2=C([C]=[C][C]=[C]2)[C]([C][C]1)C1=[C][C]=[C][C]=[C]1                                          | -8.3 |
| 740761   | C1(=[C]OC2=C([C]=[C]C(=[C]2)O[C]([C])[C])C1=O)C1=C(F)[C]=[C][C]=[C]1                              | -8.3 |
| 688853   | O1C(=[C]C(=O)C2=[C][C]=C(C(=C12)O)O)C1=[C][C]=C([C]=[C]1)O                                        | -8.3 |
| 688672   | O1C(=[C]C(=O)C2=[C][C]=C([C]=C12)O[C])C1=[C]C(=[C][C]=[C]1)O[C]                                   | -8.3 |

|               |                                                                                             |      |
|---------------|---------------------------------------------------------------------------------------------|------|
| 676034        | O1C2=C([C]=C([C]=[C]2)O)C(=O)[C]=C1C1=C([C]=[C][C]=[C]1)O[C]                                | -8.3 |
| 676033        | O1C2=C([C]=[C][C]=[C]2)C(=O)[C]=C1C1=C(C(=[C][C]=[C]1)O[C])O[C]                             | -8.3 |
| 619834        | O1C2=C([C]=[C][C]=[C]2)C(=O)[C]=C1C1=[C][C]=[C]C(=[C]1)O[C]                                 | -8.3 |
| 441251        | O1[C]=C(C(=O)C2=C(C(=C([C]=C12)O[C]))[C][C]=C([C])[C])O)C1=C([C]=C([C]=[C]1)O)O             | -8.3 |
| 439652        | O1C2=C([C]=[C][C]=[C]2)C(=O)[C][C]1C1=[C][C]=[C][C]=[C]1                                    | -8.3 |
| 369609        | O1C2=C([C]=C([C]=C2[C]([C][C]1C1=[C][C]=C(C(=[C]1)O[C])O[C])O)[C][C]=[C])O[C]               | -8.3 |
| 238782        | O1C2=C(C(=[C]C(=[C]2)O)O)C(=O)[C][C]1C1=[C][C]=[C][C]=[C]1                                  | -8.3 |
| 177032        | O1C2=C(C(=C(C(=[C]2)O)O[C])O)C(=O)[C][C]1C1=[C][C]=[C][C]=[C]1                              | -8.3 |
| 102928        | O1C2=C([C]=[C][C]=[C]2)C(=O)[C][C]1C1=[C][C]=C([C]=[C]1)O[C]                                | -8.3 |
| 76573         | O1C(=[C]C(=O)c2c(c([C])c(c([C])c12)O[C])O)C1=[C][C]=C([C]=[C]1)O[C]                         | -8.3 |
| 41449         | C1(=[C][C]=C([C]=[C]1)C1=[C]C(=O)C2=[C][C]=[C][C]=C2O1)O[C][C](O)[C]N[C]([C])[C]            | -8.3 |
| 18721         | O1C(=[C]C(=O)C2=C1[C]=C([C]=C2OC(=O)[C])OC(=O)[C])C1=[C][C]=C([C]=[C]1)OC(=O)[C]            | -8.3 |
| 11095         | O1C2=C(C(=[C]C(=[C]2)O)O)C(=O)[C][C]1C1=[C]C(=C([C]=[C]1)O)O                                | -8.3 |
| 10251         | O1C2=C([C]=[C][C]=[C]2)C(=O)[C][C]1C1=[C][C]=[C][C]=[C]1                                    | -8.3 |
| 3747          | C1(=[C][C]=C2C(=O)C(=[C]OC2=[C]1)C1=[C][C]=[C][C]=[C]1)O[C]([C])[C]                         | -8.3 |
| 13840297<br>3 | O1[C]=C(C(=O)C2=C1[C]=C(C(=[C]2)O)[C][C][C]O)C1=[C][C]=C([C]=[C]1)O                         | -8.2 |
| 13482072<br>6 | O1C(=[C]C(=O)C2=[C]C(=[C]C(=C12)O[C])O[C])C1=[C][C]=C([C]=[C]1)O[C]                         | -8.2 |
| 12988240<br>4 | O1[C]=C(C(=O)C2=C1[C]=[C][C]=[C]2)C1=[C][C]=C([C]=[C]1)[C]N                                 | -8.2 |
| 12986605<br>2 | o1c2[C]=[C][C]=[C]c2c(=O)c(c1C1=[C][C]=[C][C]=[C]1)[C]1[C]N[C][C]N1[C]C1=[C][C]=[C][C]=[C]1 | -8.2 |
| 12982447<br>9 | O1[C]2[C]=[C][C]=[C]C2=C([C]=C1C1=[C][C]=C([C]=[C]1)[C]=O)[N]O                              | -8.2 |
| 12982075<br>5 | C1(=[C][C]=c2c(=[C]1)c(=O)c(c(o2)C1=[C][C]=[C][C]=[C]1)O)[C](O)[C][C][C][C]                 | -8.2 |
| 12976293<br>0 | O1C2=C(C(=[C]C(=[C]2)O[C])O)C(=O)[C][C@]1(C1=[C][C]=C([C]=[C]1)O)O[C]                       | -8.2 |

|               |                                                                                               |      |
|---------------|-----------------------------------------------------------------------------------------------|------|
| 12966237<br>4 | o1c2=[C][C]=[C][C]=c2c(=O)c(c1[C])C1=[C][C]=C([C]=[C]1)N(=O)=O                                | -8.2 |
| 12148792<br>9 | O1C2=[C][C]=[C][C]=C2C(=O)[C][C]1C1=[C][C]=[C][C]=[C]1                                        | -8.2 |
| 10232004<br>0 | O1[C]=C(C(=O)c2c(c(c(c12)O)O)O[C])O)C1=[C][C]=C([C]=[C]1)O                                    | -8.2 |
| 10113705<br>4 | C1(=C([C]=C(C2=C1O[C]=C(C2=O)C1=[C][C]=C([C]=C1O)O)O)[C]C([C])([C])O                          | -8.2 |
| 10102840<br>7 | O1C(=[C]C(=O)C2=C([C]=C(C(=C12)N[C][C]([C])([C])O[C])O[C])C1=[C][C]=[C][C]=[C]1               | -8.2 |
| 71777365      | O1C2=[C][C]=[C][C]=C2C(=O)[C][C]1C1=[C][C]=[C][C]=[C]1                                        | -8.2 |
| 71621987      | C1(=[C][C]=C2C(=O)C(=[C]OC2=[C]1)C1=[C][C]=C([C]=[C]1)O)O[C]1O[C]([C]([C]([C]1O)O)O[C])([C])O | -8.2 |
| 69029207      | C1(=[C][C]=C2C(=O)[C]=C(OC2=[C]1)C1=[C]C=C([C]=[C]1)O[C])O[C])O[C][C][C]Br                    | -8.2 |
| 57340186      | O1C2=[C]C(=[C][C]=C2C(=O)[C]=C1C1=[C][C]=C([C]=[C]1)/[C]=[C]/C(=O)O[C][C])O                   | -8.2 |
| 49788612      | o1c2=[C]C(=[C]C(=c2c(=O)c(c1C1=[C]C2=C([C]=[C]1)O[C]O2)O)O)O[C]                               | -8.2 |
| 44380950      | O1C(=[C]C(=O)C2=C1C(=C([C]=C2O)O)N[C][C]=[C])C1=[C][C]=[C][C]=[C]1                            | -8.2 |
| 29920547      | O1C(=[C]C(=O)C2=C1[C]=C([C]=C2[C])OC(=O)O[C][C])C1=[C][C]=[C][C]=[C]1                         | -8.2 |
| 25201487      | O1[C](C(=O)C(=O)C2=[C][C]=[C][C]=C12)C1=[C][C]=[C][C]=[C]1                                    | -8.2 |
| 24866263      | C1(=[C][C]=C([C]=[C]1)C1=[C]C(=O)C2=C([C]=C([C]=C2O1)O)O)O[C]1O[C]([C]([C]([C]1O)O)O)[C]      | -8.2 |
| 24866262      | C1(=C([C]=C([C]=[C]1)C1=[C]C(=O)C2=C([C]=C([C]=C2O1)O)O)O[C])O[C]1O[C]([C]([C]([C]1O)O)O)[C]  | -8.2 |
| 23644936      | c1(c(c(=O)c2[C]=[C]C(=[C]c2o1)O[C])C1=[C][C]=[C][C]=[C]1)SC1=N[C]=[C]N1                       | -8.2 |
| 21576250      | O1[C]=C(C(=O)C2=C([C]=C(C(=C12)C([C])([C])[C]=[C])O)O)C1=[C][C]=C([C]=C1O)O                   | -8.2 |
| 20522556      | c1(c(c(=O)c2C(=[C]C(=[C]c2o1)O[C])O)O[C])C1=[C][C]=C(C(=[C]1)O[C])OC(=O)C([C])([C])[C]        | -8.2 |
| 19835350      | C1(=C2C(=[C][C]=[C]1)C(=O)[C]=C(O2)C1=[C][C]=[C][C]=[C]1)O[C][C]1O[C]1                        | -8.2 |
| 18324995      | c1(c(c(=O)c2[C]=[C][C]=[C]c2o1)C1=C([C]=[C][C]=[C]1)F)C1=[C][C]=C([C]=[C]1)S(=O)(=O)N         | -8.2 |
| 15817847      | o1c2=[C]C(=C([C]=c2c(=O)c(c1C1=[C][C]=C(C(=[C]1)O[C])O)O)O)O                                  | -8.2 |
| 15160703      | O1C2=C([C]=C(C3=C2[C]=[C]C(O3)([C])([C])O[C])C(=O)[C][C]1C1=[C]C(=C([C]=[C]1)O[C])O[C]        | -8.2 |
| 13942547      | o1c(c(c(=O)c2=C([C]=C(C(=c12)O[C])O[C][C]=C([C])([C])O[C])O[C])C1=[C]C2=C([C]=[C]1)O[C]O2     | -8.2 |
| 13908971      | O1C2=C(C3=C(C(=[C]2)O)C(=O)C(=[C]O3)C2=C([C]=C([C]=[C]2)O)O)[C][C]1C(=[C])[C]                 | -8.2 |

|                 |                                                                                                |      |
|-----------------|------------------------------------------------------------------------------------------------|------|
| <b>13250353</b> | <chem>O1C2=C(C(=[C][C]=[C]2)O)[C][C][C]1C1=[C][C]=[C][C]=[C]1</chem>                           | -8.2 |
| <b>12735893</b> | <chem>o1c(c(c(=O)c2[C]=[C]C3=C([C]=[C]O3)c12)O[C])C1=[C][C]=C([C]=[C]1)O[C]</chem>             | -8.2 |
| <b>12407866</b> | <chem>O1C(=[C]C(=O)C2=C1[C]=[C]C(=[C]2)C(=O)O[C])C1=C([C]=[C][C]=[C]1)O</chem>                 | -8.2 |
| <b>12261178</b> | <chem>O1C2=C([C]=[C][C]=[C]2)C(=O)[C]=C1C1=[C][C]=C([C]=[C]1)[C]=O</chem>                      | -8.2 |
| <b>12136839</b> | <chem>O1C2=C([C]=[C][C]=[C]2)C(=O)[C][C]1C1=[C][C]=[C][C]=[C]1</chem>                          | -8.2 |
| <b>11847318</b> | <chem>c1(c(c(=O)c2[C]=[C][C]=[C]c2o1)[C]N1[C]=N[C]=[C]1)C1=[C][C]=C(Br)[C]=[C]1</chem>         | -8.2 |
| <b>11847316</b> | <chem>o1c2=[C][C]=[C][C]=c2c(=O)c(c1C1=[C][C]=[C][C]=[C]1)[C]N1[C]=N[C]=[C]1</chem>            | -8.2 |
| <b>11417114</b> | <chem>c1(c(c(=O)c2[C]=[C]C(=[C]c2o1)O)C1=[C][C]=[C][C]=[C]1)S[C]C1=[C]N=[C][C]=[C]1</chem>     | -8.2 |
| <b>11142360</b> | <chem>O1[C]=C(C(=O)C2=C1[C]=C1C(=[C]2)O[C]O1)C1=[C]C(=C2C(=[C]1)O[C]O2)O[C]</chem>             | -8.2 |
| <b>11032058</b> | <chem>[C]1([C]C(=O)C2=C([C]=[C][C]=[C]2)O1)C1=[C][C]=C(F)[C]=[C]1</chem>                       | -8.2 |
| <b>10685123</b> | <chem>C1(=[C][C]=C2C(=[C]1)C(=O)[C]=C(O2)C1=[C][C]=[C][C]=[C]1)[C]N=C=S</chem>                 | -8.2 |
| <b>10613051</b> | <chem>C1(=[C]C(=O)C2=C([C]=[C][C]=[C]2)O1)C1=[C][C]=C([C]=[C]1)[S@](=O)[C]</chem>              | -8.2 |
| <b>6450959</b>  | <chem>O1[C]=C(C(=O)C2=C([C]=C(C(=C12)[C]/[C]=C([C])/[C]O)O)O)C1=[C][C]=C([C]=[C]1)O</chem>     | -8.2 |
| <b>5487268</b>  | <chem>C1(=C([C]=C(C(=[C]1)O)C1=[C]OC2=[C]C(=[C]C(=C2C1=O)O)O)C([C])([C])[C]=[C])O</chem>       | -8.2 |
| <b>5466137</b>  | <chem>o1c2=[C]C(=[C]C(=c2c(=O)c(c1C1=[C]C2=C([C]=[C]1)O[C]O2)O[C])O)O[C]</chem>                | -8.2 |
| <b>5417907</b>  | <chem>o1c2[C]=C([C]=[C]c2c(=O)c(c1[C])C1=[C][C]=C([C]=[C]1)N(=O)=O)O</chem>                    | -8.2 |
| <b>5356690</b>  | <chem>O1C2=[C][C]=[C][C]=C2[C]([C][C]1C1=[C][C]=[C][C]=[C]1)[N]O</chem>                        | -8.2 |
| <b>5317481</b>  | <chem>O1[C]=C(C(=O)C2=C([C]=C(C(=C12)[C]/[C]=C([C])/[C]O)O)O)C1=[C][C]=C(C(=[C]1)O)O[C]</chem> | -8.2 |
| <b>5317284</b>  | <chem>O1C(=[C]C(=O)C2=C1[C]=C(C(=C2O)O[C])O)C1=[C][C]=C(C(=[C]1)O)O</chem>                     | -8.2 |
| <b>5310669</b>  | <chem>C1(=[C]OC2=C([C]=[C]C(=[C]2)O)C1=O)C1=[C][C]=C(F)[C]=[C]1</chem>                         | -8.2 |
| <b>5281954</b>  | <chem>O1C(=[C]C(=O)C2=C1[C]=C([C]=C2O)O[C])C1=[C][C]=[C][C]=[C]1</chem>                        | -8.2 |
| <b>5281805</b>  | <chem>C1(=[C]OC2=[C]C(=[C][C]=C2C1=O)O)C1=[C]C2=C(O[C]O2)[C]=[C]1</chem>                       | -8.2 |
| <b>5281703</b>  | <chem>O1C(=[C]C(=O)C2=C([C]=C(C(=C12)O[C])O)O)C1=[C][C]=[C][C]=[C]1</chem>                     | -8.2 |
| <b>5281692</b>  | <chem>o1c2[C]=C([C]=[C]c2c(=O)c(c1C1=[C]C(=C(C(=[C]1)O)O)O)O)O</chem>                          | -8.2 |
| <b>5281616</b>  | <chem>o1c(c(c(=O)c2=C([C]=C([C]=c12)O)O)O)C1=[C][C]=[C][C]=[C]1</chem>                         | -8.2 |
| <b>5281614</b>  | <chem>o1c2[C]=C([C]=[C]c2c(=O)c(c1C1=[C]C(=C([C]=[C]1)O)O)O)O</chem>                           | -8.2 |
| <b>5281612</b>  | <chem>O1C2=[C]C(=[C]C(=C2C(=O)[C]=C1C1=[C][C]=C(C(=[C]1)O)O[C])O)O</chem>                      | -8.2 |
| <b>5280863</b>  | <chem>o1c(c(c(=O)c2C(=[C]C(=[C]c12)O)O)O)C1=[C][C]=C([C]=[C]1)O</chem>                         | -8.2 |
| <b>5280442</b>  | <chem>O1C(=[C]C(=O)C2=C1[C]=C([C]=C2O)O)C1=[C][C]=C([C]=[C]1)O[C]</chem>                       | -8.2 |

|                 |                                                                                                          |      |
|-----------------|----------------------------------------------------------------------------------------------------------|------|
| <b>5272801</b>  | <chem>O1C2=C([C]=[C][C]=[C]2)C(=O)[C]=C1C1=[C][C]=C([C]=[C]1)C1=N[C][C]O1</chem>                         | -8.2 |
| <b>3890073</b>  | <chem>[N]([C]1C2=[C][C]=[C][C]=C2O[C]([C]1)C1=[C][C]=[C][C]=[C]1)NC(=S)N</chem>                          | -8.2 |
| <b>3070240</b>  | <chem>c1(c([C])c(=O)c2[C]=[C]C(=C(c2o1)[C]N([C])[C])O[C])C1=[C][C]=C(F)[C]=[C]1</chem>                   | -8.2 |
| <b>689010</b>   | <chem>O1C2=C([C]=[C][C]=[C]2)C(=O)[C][C]1C1=[C][C]=[C][C]=[C]1</chem>                                    | -8.2 |
| <b>676299</b>   | <chem>O1C(=[C]C(=O)C2=C1C(=C([C]=[C]2)O[C])O)C1=[C][C]=[C][C]=[C]1</chem>                                | -8.2 |
| <b>462697</b>   | <chem>O1C2=[C]C(=[C]C(=C2C(=O)[C]([C]1C1=[C]C(=C([C]=[C]1)O[C])O[C]C1=[C][C]=[C][C]=[C]1)O[C])O)O</chem> | -8.2 |
| <b>439712</b>   | <chem>O1C2=[C][C]=[C][C]=C2[C]([C][C]1C1=[C][C]=[C][C]=[C]1)O</chem>                                     | -8.2 |
| <b>439246</b>   | <chem>O1C2=[C]C(=[C]C(=C2C(=O)[C][C]1C1=[C][C]=C([C]=[C]1)O)O)O</chem>                                   | -8.2 |
| <b>378567</b>   | <chem>O1C2=[C]C(=[C]C(=C2C(=O)[C][C]1C1=[C][C]=[C][C]=[C]1)O[C])O[C]</chem>                              | -8.2 |
| <b>373260</b>   | <chem>O1C(=[C]C(=O)C2=C1[C]=C(C(=C2O)O)O[C])C1=[C][C]=C(C(=[C]1)O)O[C]</chem>                            | -8.2 |
| <b>344546</b>   | <chem>o1c(c(c(=O)c2[C]=[C][C]=C([C]=c12)O[C])O)C1=[C][C]=[C][C]=[C]1</chem>                              | -8.2 |
| <b>229016</b>   | <chem>O1C2=C([C]=[C][C]=[C]2)C(=O)[C]=C1C1=[C][C]=C([C]=[C]1)O</chem>                                    | -8.2 |
| <b>188308</b>   | <chem>O1C2=[C]C(=C(C(=C2C(=O)[C][C]1C1=[C][C]=C([C]=[C]1)O)O)O)O</chem>                                  | -8.2 |
| <b>176925</b>   | <chem>O1C2=C([C]=[C][C]=[C]2)C(=O)[C][C]1C1=[C][C]=[C][C]=C1O</chem>                                     | -8.2 |
| <b>160921</b>   | <chem>O1C(=[C]C(=O)c2c(c(c(c12)O[C])O)O[C])O)C1=[C][C]=C([C]=[C]1)O[C]</chem>                            | -8.2 |
| <b>137327</b>   | <chem>O1C(=[C]C(=O)C2=[C]C(=[C]C(=C12)[C]C(=O)O)[C])C1=[C][C]=[C][C]=[C]1</chem>                         | -8.2 |
| <b>136418</b>   | <chem>O1C(=[C]C(=O)C2=C(C(=C([C]=C12)OC(=O)[C])OC(=O)[C])OC(=O)[C])C1=[C][C]=C([C]=[C]1)OC(=O)[C]</chem> | -8.2 |
| <b>100633</b>   | <chem>o1c(c(c(=O)c2[C]=[C]C3=C([C]=[C]O3)c12)O[C])C1=[C][C]=[C][C]=[C]1</chem>                           | -8.2 |
| <b>77793</b>    | <chem>O1C2=C([C]=[C][C]=[C]2)C(=O)[C]=C1C1=[C][C]=C([C]=[C]1)O[C]</chem>                                 | -8.2 |
| <b>72281</b>    | <chem>O1C2=[C]C(=[C]C(=C2C(=O)[C][C]1C1=[C]C(=C([C]=[C]1)O[C])O)O)O</chem>                               | -8.2 |
| <b>72279</b>    | <chem>O1C(=[C]C(=O)C2=C1[C]=[C]C(=[C]2)O)C1=[C][C]=[C][C]=[C]1</chem>                                    | -8.2 |
| <b>51459</b>    | <chem>o1c2=[C][C]=[C][C]=c2c(=O)c([C])c1C1=[C][C]=[C][C]=[C]1</chem>                                     | -8.2 |
| <b>11055</b>    | <chem>O1C(=[C]C(=O)C2=C([C]=[C]C(=C12)O)O)C1=[C][C]=[C][C]=[C]1</chem>                                   | -8.2 |
| <b>3593</b>     | <chem>O1C2=[C]C(=[C]C(=C2C(=O)[C][C]1C1=[C]C(=C([C]=[C]1)O[C])O)O)O</chem>                               | -8.2 |
| <b>1880</b>     | <chem>O1C(=[C]C(=O)C2=[C][C]=C(C(=C12)O)O)C1=[C][C]=[C][C]=[C]1</chem>                                   | -8.2 |
| <b>932</b>      | <chem>O1C2=[C]C(=[C]C(=C2C(=O)[C][C]1C1=[C][C]=C([C]=[C]1)O)O)O</chem>                                   | -8.2 |
| <b>14668157</b> | <chem>o1c(c(c(=O)c2C(=C3C(=[C]c12)O[C]O3)O)O[C](O)O)C1=[C][C]=[C][C]=[C]1</chem>                         | -8.1 |

|               |                                                                                         |      |
|---------------|-----------------------------------------------------------------------------------------|------|
| 12985837<br>0 | O1C2=C([C]=[C]C=[C]2)O[C]C(=O)O)C(=O)[C]=C1C1=[C]C(=C(C=[C]1)O[C])O[C])O[C]             | -8.1 |
| 12985288<br>2 | [S]([C]1C(=O)c2c(c(c(c2O[C]1C1=[C]C(=C([C]=[C]1)O[C])O[C])O[C])O[C])O[C])O[C])([O])[O]  | -8.1 |
| 12983454<br>0 | C1(=C([C]=C2C(=C1O)C(=O)[C]=C(O2)C1=[C][C]=C([C]=[C]1)[C])O)S([O])([O])O                | -8.1 |
| 12982959<br>8 | o1c(c(c(=O)c2c(c(c(c12)O)O)O)O[C])O)C1=[C][C]=[C][C]=[C]1                               | -8.1 |
| 12982449<br>0 | O1C2=[C][C]=[C][C]C2=C([C]=C1C1=[C][C]=C([C]=[C]1)[C]=O)[N]O[C][C]                      | -8.1 |
| 12981955<br>7 | O1C2=C([C]=[C][C]=[C]2)C(=O)[C]([C]1C1=[C][C]=[C][C]=[C]1)O                             | -8.1 |
| 12973227<br>0 | o1c2=[C][C]=[C][C]=c2c(=O)c(c1C1=[C][C]=[C][C]=[C]1)OO                                  | -8.1 |
| 12971127<br>8 | C1(=[C][C]=[C]C2=C1C(=O)[C]=C(O2)C1=[C][C]=[C][C]=[C]1)C(O)(O)[C]([C]([C])O)            | -8.1 |
| 12968466<br>8 | o1c(c(c(=O)c2c(c(c(c12)O)O)/[C]=[C]/C(=[C])[C])O)O)C1=[C][C]=[C][C]=[C]1                | -8.1 |
| 10257792<br>6 | O1C(=[C]C(=O)C2=C1[C]=C([C]=C2O)O)C1=[C][C]=C([C]=[C]1)O[C]O[C]                         | -8.1 |
| 10200537<br>4 | C1(=[C]C(=O)C2=C(C(=C([C]=C2O[C])O[C]))[C]2[C][C][C][C][C]2O)O1)C1=C(Cl)[C]=[C][C]=[C]1 | -8.1 |
| 10193061<br>3 | O1[C]2[C]=[C][C]=[C]C2=[C][C]=C1C1=[C][C]=C([C]=[C]1)NC([C])([C])[C]                    | -8.1 |
| 73829902      | O1C2=C(C(=[C][C]=C2C(=O)[C]([C]1C1=[C][C]=C(C(=[C]1)O)O)O)O)O                           | -8.1 |
| 70018578      | O1C2=[C]C(=[C][C]=C2C(=O)[C][C]1C1=[C][C]=C([C]=[C]1)O[C])O                             | -8.1 |
| 57368437      | o1c(c(c(=O)c2[C]=C([C]=C(c12)O)O)O)C1=[C][C]=C([C]=[C]1)O                               | -8.1 |
| 57363368      | o1c(c(c(=O)c2[C]=C([C]=C(c12)O)O)O)C1=[C][C]=C([C]=[C]1)O[C]                            | -8.1 |
| 54070148      | C1(=[C][C]=C([C]=[C]1)O[C][C]O)[C]1OC2=[C][C]=[C][C]=C2[C][C]1                          | -8.1 |
| 53233892      | C1(=[C]C2=C([C]=[C]1)OC(=[C]C2=O)C1=[C][C]=[C][C]=[C]1)OP(=O)(O[C][C])O[C][C]           | -8.1 |

|                 |                                                                                                    |      |
|-----------------|----------------------------------------------------------------------------------------------------|------|
| <b>44260056</b> | $O1C(=[C]C(=O)c2c(c(c(c12)O[C])O[C])OC(=O)[C]([C])([C])O)C1=[C][C]=C([C]=[C]1)O$                   | -8.1 |
| <b>44260022</b> | $o1c(c(c(=O)c2C(=[C]C(=C(c12)O[C])O[C][C]=C([C])([C])O)O[C])C1=[C][C]=C(C(=[C]1)O[C])O$            | -8.1 |
| <b>44258732</b> | $o1c(c(c(=O)c2c(c([C])c(c([C])c12)O[C])O)O)C1=[C][C]=[C][C]=[C]1$                                  | -8.1 |
| <b>44258533</b> | $O1C(=[C]C(=O)C2=C(C(=C([C]=C12)O[C])O[C])O[C])C1=[C]C(=C(C(=[C]1)O[C])O[C][C]=C([C])([C])O[C])$   | -8.1 |
| <b>44257359</b> | $O1[C]=C(C(=O)C2=C1[C]=C1C(=C2O[C])O[C]O1)C1=[C]C(=C([C]=[C]1)O[C])O$                              | -8.1 |
| <b>42608063</b> | $O1C2=C(C(=[C]C3=C2[C]=[C]C(O3)([C])([C])O[C])C(=O)[C][C]1C1=[C][C]=C([C]=[C]1)O[C])$              | -8.1 |
| <b>25022469</b> | $O1C(=[C]C(=O)C2=C(C(=[C]C(=C12)O[C])O[C])O[C])C1=C([C]=[C]C(=[C]1)O[C])O[C]$                      | -8.1 |
| <b>21636237</b> | $O1C2=C(C(=[C]C(=C2O[C])O[C])O)C(=O)[C][C]1C1=[C][C]=[C][C]=C1O[C]$                                | -8.1 |
| <b>21626042</b> | $O1[C]=C(C(=O)C2=C1[C]=C1C(=C2O[C])O[C]O1)C1=C([C]=C2C(=[C]1)O[C]O2)O[C]$                          | -8.1 |
| <b>21325037</b> | $C1(=[C]C2=C([C]=[C]1)OC(=[C]C2=O)C1=C([C]=[C][C]=[C]1)O[C]([C])([C])C(=O)Cl$                      | -8.1 |
| <b>21270134</b> | $C1(=[C]OC2=C([C]=C(C(=[C]2)O)O)C1=O)C1=[C]C(=[C][C]=[C]1)Cl$                                      | -8.1 |
| <b>20452422</b> | $O1C2=C([C]=[C][C]=[C]2)[C][C][C]1C1=[C][C]=C([C]=[C]1)N([C])[C]$                                  | -8.1 |
| <b>18325002</b> | $c1(c(c(=O)c2[C]=[C][C]=[C]c2o1)C1=C([C]=[C][C]=[C]1)F)C1=[C][C]=C([C]=[C]1)S(=O)(=O)[C]$          | -8.1 |
| <b>14804713</b> | $o1c(c(c(=O)c2=C([C])[C]=C([C]=c12)O[C])O[C])C1=[C][C]=C([C]=[C]1)O$                               | -8.1 |
| <b>12310641</b> | $O1C2=[C]C(=[C][C]=C2C(=O)[C]([C]1C1=[C][C]=C(C(=[C]1)O)O)O)O$                                     | -8.1 |
| <b>11847319</b> | $o1c2=[C][C]=[C][C]=c2c(=O)c(c1C1=[C][C]=C([C]=[C]1)C\#N)[C]N1[C]=N[C]=[C]1$                       | -8.1 |
| <b>11810763</b> | $O1[C]=C(C(=O)C2=C(C3=C([C]=C12)O[C]O3)O[C])C1=[C]C(=C2C(=[C]1)O[C]O2)O[C]$                        | -8.1 |
| <b>11485667</b> | $c1(c(c(=O)c2[C]=[C]C(=[C]c2o1)O[C])C1=[C][C]=[C][C]=[C]1)S[C]C1=[C][C]=[C][C]=N1$                 | -8.1 |
| <b>11316719</b> | $O1C(=[C]C(=O)C2=C1[C]=C(C(=C2OC(=O)[C])OC(=O)[C])O[C]C1=[C][C]=[C][C]=[C]1)C1=[C][C]=[C][C]=[C]1$ | -8.1 |
| <b>11164739</b> | $c1(c(c(=O)c2=[C][C]=C([C]=c2o1)O[C])C1=[C][C]=[C][C]=[C]1)S[C]C1=[C][C]=[C]N=[C]1$                | -8.1 |
| <b>11153057</b> | $c1(c(c(=O)c2[C]=[C]C(=[C]c2o1)O[C])C1=[C][C]=[C][C]=[C]1)S[C]C1=[C][C]=N[C]=[C]1$                 | -8.1 |
| <b>10814211</b> | $o1c(c(c(=O)c2c(c(c(c12)O[C])O[C][C]=C([C])([C])O[C])O[C])O[C])C1=[C][C]=C2C(=[C]1)O[C]O2$         | -8.1 |
| <b>10665235</b> | $o1c(c(c(=O)c2=C([C]=C(C(=c12)O[C])O[C])O)O)C1=[C]C(=C([C]=[C]1)O)O$                               | -8.1 |
| <b>10612616</b> | $O1C(=[C]C(=O)C2=C1[C]=[C][C]=C2O[C][C]=[C])C1=[C][C]=[C][C]=[C]1$                                 | -8.1 |
| <b>10069029</b> | $c1(c(c(=O)c2[C]=[C]C(=[C]c2o1)O)C1=[C][C]=C([C]=[C]1)O[C])S[C]C1=[C][C]=N[C]=[C]1$                | -8.1 |
| <b>9821032</b>  | $c1(c(c(=O)c2=[C][C]=[C][C]=c2o1)C1=[C][C]=[C][C]=[C]1)C1=[C][C]=C([C]=[C]1)S(=O)(=O)[C]$          | -8.1 |
| <b>6077518</b>  | $O1C2=C([C]=[C][C]=[C]2)[C]([C][C]1C1=[C][C]=[C][C]=[C]1)[N]O[C][C]N([C][C])[C][C]$                | -8.1 |
| <b>5491929</b>  | $O1[C]=C(C(=O)C2=C1[C]=C1C(=C2O)O[C]O1)C1=C([C]=[C][C]=[C]1)O[C]$                                  | -8.1 |
| <b>5490139</b>  | $O1C2=[C]C3=C(C(=O)C(=[C]O3)C3=[C][C]=C([C]=[C]3)O)C(=C2[C]=[C]C1([C])([C])O$                      | -8.1 |



|         |                                                                                  |      |
|---------|----------------------------------------------------------------------------------|------|
| 5469524 | $O1C(=[C]C(=O)C2=C1[C]=C(C(=C2O)O[C])O)C1=[C][C]=C(C(=[C]1)O)O[C]$               | -8.1 |
| 5465888 | $O1C2=[C][C]=[C][C]=C2/C(=N/N(C(=O)[C])C(=O)[C])/[C][C]1C1=[C][C]=[C][C]=[C]1$   | -8.1 |
| 5393152 | $o1c(c(c(=O)c2=[C][C]=C([C]=c12)O)O)C1=[C][C]=[C][C]=[C]1$                       | -8.1 |
| 5385026 | $o1c(c(c(=O)c2C(=C(C(=[C]c12)O)O[C])O[C])O)C1=[C][C]=[C][C]=[C]1$                | -8.1 |
| 5378518 | $O1C2=C([C]=[C]C(=[C]2)O)C(=O)[C]=C1C1=[C]C(=C([C]=[C]1)O[C])O[C]$               | -8.1 |
| 5378202 | $C1(=C([C]=C(C2=C1O[C]=C(C2=O)C1=[C][C]=C([C]=[C]1)O)O)O)[C][C]C([C])([C])O$     | -8.1 |
| 5353357 | $O1C(=[C]C(=O)C2=[C]C(=C([C]=C12)O)O)C1=[C][C]=[C][C]=[C]1$                      | -8.1 |
| 5321861 | $o1c(c(c(=O)c2=C([C]=C(C(=c12)O)O)O[C])C1=[C]C(=C([C]=[C]1)O[C])O$               | -8.1 |
| 5320438 | $O1C(=[C]C(=O)C2=C(C(=C([C]=C12)O)O[C])O)C1=[C][C]=C([C]=[C]1)O[C]$              | -8.1 |
| 5319422 | $O1[C]=C(C(=O)C2=C1[C]=C([C]=[C]2)O)C1=[C]C(=C([C]=[C]1)O)O[C]$                  | -8.1 |
| 5318869 | $o1c(c(c(=O)c2C(=[C]C(=[C]c12)O[C])O)O[C])C1=[C][C]=C([C]=[C]1)O$                | -8.1 |
| 5284648 | $O1[C]=C(C(=O)C2=C1[C]=C([C]=[C]2)O)C1=[C]C(=C([C]=[C]1)O)O$                     | -8.1 |
| 5282074 | $O1[C]=C(C(=O)C2=C1[C]=C([C]=C2O)O)C1=[C][C]=C([C]=C1O)O$                        | -8.1 |
| 5281950 | $o1c(c(c(=O)c2=C([C]=C(C(=c12)C([C])([C])[C]=[C])O)O)O)C1=[C][C]=[C][C]=[C]1$    | -8.1 |
| 5281949 | $o1c(c(c(=O)c2C(=[C]C(=C(c12)C([C])([C])[C]=[C])O)O)O)C1=[C][C]=C([C]=[C]1)O[C]$ | -8.1 |
| 5281811 | $O1[C]=C(C(=O)C2=C(C(=C([C]=C12)O)O[C])O)C1=[C][C]=C([C]=[C]1)O$                 | -8.1 |
| 5281691 | $o1c(c(c(=O)c2C(=[C]C(=[C]c12)O[C])O)O)C1=[C][C]=C(C(=[C]1)O)O$                  | -8.1 |
| 5281628 | $O1C(=[C]C(=O)C2=C1[C]=C(C(=C2O)O[C])O)C1=[C][C]=C([C]=[C]1)O$                   | -8.1 |
| 5281617 | $O1C(=[C]C(=O)C2=C1[C]=C([C]=C2O)O[C])C1=[C][C]=C([C]=[C]1)O$                    | -8.1 |
| 5281611 | $o1c2=[C]C(=[C][C]=c2c(=O)c(c1C1=[C][C]=C([C]=[C]1)O)O)O$                        | -8.1 |
| 5280961 | $O1[C]=C(C(=O)C2=C1[C]=C([C]=C2O)O)C1=[C][C]=C([C]=[C]1)O$                       | -8.1 |
| 5280448 | $O1[C]=C(C(=O)C2=C1[C]=C([C]=[C]2)O)C1=[C][C]=C(C(=[C]1)O)O[C]$                  | -8.1 |
| 5280443 | $O1C(=[C]C(=O)C2=C1[C]=C([C]=C2O)O)C1=[C][C]=C([C]=[C]1)O$                       | -8.1 |
| 5280417 | $o1c(c(c(=O)c2=C([C]=C([C]=c12)O[C])O)O[C])C1=[C]C(=C([C]=[C]1)O)O$              | -8.1 |
| 4231835 | $O1C2=[C][C]=[C][C]=C2C(=O)[C]=C1C1=C([C]=[C]C(=[C]1)O[C])O[C]$                  | -8.1 |
| 3083783 | $O1C(=[C]C(=O)c2c(c(c(c12)O)O[C])O[C])O)C1=[C][C]=C([C]=[C]1)O[C]$               | -8.1 |
| 1232440 | $O1C2=[C][C]=[C][C]=C2[C][C][C]1C1=[C][C]=[C][C]=[C]1$                           | -8.1 |
| 847733  | $O1C2=[C][C]=[C][C]=C2[C][C]([C]1C1=[C][C]=[C][C]=[C]1)O$                        | -8.1 |
| 689014  | $O1C(=[C]C(=O)C2=C1C(=C([C]=[C]2)O[C])O[C])C1=[C][C]=[C][C]=[C]1$                | -8.1 |

|          |                                                                                         |      |
|----------|-----------------------------------------------------------------------------------------|------|
| 688715   | $o1c2=[C][C]=[C][C]=c2c(=O)c(c1C1=[C][C]=C([C]=[C]1)O)O$                                | -8.1 |
| 688671   | $O1C(=[C]C(=O)C2=[C][C]=C([C]=C12)O[C])C1=C([C]=[C][C]=[C]1)O[C]$                       | -8.1 |
| 688659   | $o1c(c(c(=O)c2[C]=C([C]=[C]c12)O)O)C1=[C][C]=[C][C]=[C]1$                               | -8.1 |
| 676295   | $o1c2=[C][C]=[C][C]=c2c(=O)c(c1C1=[C][C]=[C]C(=[C]1)O)O$                                | -8.1 |
| 676290   | $O1C2=[C][C]=[C][C]=C2C(=O)[C]=C1C1=C([C]=C([C]=[C]1)O)O$                               | -8.1 |
| 676289   | $O1C2=C([C]=[C][C]=[C]2)C(=O)[C]=C1C1=C(C(=[C][C]=[C]1)O)O$                             | -8.1 |
| 636496   | $O1C2=[C]C3=C(C(=O)C(=[C]O3)C3=C([C]=C([C]=[C]3)O[C])O)C(=C2[C]=[C]C1([C])([C])O[C]$    | -8.1 |
| 633124   | $O1C(=[C]C(=O)c2c(c(c(c12)O[C])O)O[C])O)C1=[C]C(=C(C(=[C]1)O[C])O[C])O$                 | -8.1 |
| 578729   | $o1c2=[C][C]=[C][C]=c2c(=O)c(c1C1=[C][C]=[C][C]=C1O[C])O$                               | -8.1 |
| 468911   | $O1C2=C(C(=[C]C(=C2O)O)O)C(=O)[C]([C]1C1=[C][C]=C([C]=[C]1)O)O$                         | -8.1 |
| 443638   | $O1C2=C(C(=[C]C(=[C]2)O)O)[C]([C][C]1C1=[C][C]=C([C]=[C]1)O)O$                          | -8.1 |
| 369616   | $O1C2=C([C]=C([C]=C2O[C])[C][C]=[C])[C]([C][C]1C1=[C][C]=C(C(=[C]1)O[C])O[C])OC(=O)[C]$ | -8.1 |
| 369615   | $O1C2=C([C]=[C][C]=C2O[C])C(=[C])[C][C]1C1=[C]C(=C([C]=[C]1)O)O[C]$                     | -8.1 |
| 321346   | $O1C2=[C]C(=[C]C(=C2C(=O)[C][C]1C1=[C][C]=C([C]=[C]1)O[C])O)O[C]$                       | -8.1 |
| 161271   | $O1C(=[C]C(=O)C2=C1[C]=C(C(=C2O)O[C])O[C])C1=[C][C]=C([C]=[C]1)O[C]$                    | -8.1 |
| 154227   | $O1C2=C([C]=[C]C(=[C]2)O[C])C(=O)[C]=C1C1=[C][C]=C(C(=[C]1)O[C])O[C]$                   | -8.1 |
| 94156    | $O1C2=[C][C]=[C][C]=C2[C][C][C]1C1=[C][C]=[C][C]=[C]1$                                  | -8.1 |
| 73202    | $O1C2=C(C(=[C]C(=[C]2)O)O)C(=O)[C]([C]1C1=[C][C]=[C][C]=[C]1)O$                         | -8.1 |
| 72304    | $O1[C]=C(C(=O)C2=C1[C]=[C][C]=[C]2)C1=[C][C]=[C][C]=[C]1$                               | -8.1 |
| 55748    | $O1C(=[C]C(=O)C2=[C][C]=[C]C(=C12)[C]C(=O)O)C1=[C][C]=[C][C]=[C]1$                      | -8.1 |
| 53645    | $O1C(=[C]C(=O)C2=[C][C]=[C]C(=C12)O)C1=[C][C]=[C][C]=[C]1$                              | -8.1 |
| 25585    | $o1c([C])c(c(=O)c2=[C][C]=[C]C(=c12)O[C]N([C])[C])C1=[C][C]=C([C]=[C]1)O[C]$            | -8.1 |
| 20399    | $O1C2=[C]C(=[C][C]=C2C(=O)[C]([C]1C1=[C]C(=C(C(=[C]1)O)O)O)O)O$                         | -8.1 |
| 10680    | $O1C2=C([C]=[C][C]=[C]2)C(=O)[C]=C1C1=[C][C]=[C][C]=[C]1$                               | -8.1 |
| 13903075 | $O1[C]=C(C(=O)C2=C1C(=C([C]=[C]2)[C][C][C]O)O[C])C1=[C][C]=C([C]=[C]1)O[C]$             | -8   |
| 7        |                                                                                         |      |
| 13482227 | $O1[C]=C(C(=O)C2=C(C3=C([C]=C12)O[C]O3)O)C1=[C][C]=C([C]=[C]1)O[C]$                     | -8   |
| 8        |                                                                                         |      |

|               |                                                                                      |    |
|---------------|--------------------------------------------------------------------------------------|----|
| 12986463<br>5 | O1C(=[C]C(=O)C2=C1[C]=[C][C]=C2O[C]O)C1=[C][C]=[C][C]=[C]1                           | -8 |
| 12984791<br>0 | O1C2=C(C(=[C]C(=[C]2)O)O)[C](C(=O)[C]1C1=[C][C]=[C]C(=[C]1)O[C])O                    | -8 |
| 12984790<br>9 | o1c(c(c(=O)c2=[C][C]=C([C]=c12)O[C](O)O)O[C]O)C1=[C][C]=[C][C]=[C]1                  | -8 |
| 12982170<br>5 | o1c(c([C])c(=O)c2[C]=C(C(=C(c12)N([C])[C])O)O)C1=[C][C]=C([C]=[C]1)O                 | -8 |
| 10166596<br>2 | o1c2=[C]C(=[C][C]=c2c(=O)c(c1C1=[C][C]=C(C(=[C]1)O[C][C]O)O[C][C]O)O[C][C]O)O[C][C]O | -8 |
| 10102840<br>9 | O1C(=[C]C(=O)C2=C1C(=C([C]=C2O[C])O[C])N[C][C]=[C])C1=[C][C]=[C][C]=[C]1             | -8 |
| 10102840<br>6 | O1C(=[C]C(=O)C2=C1C(=C([C]=C2O[C])O[C])N[C][C][C])C1=[C][C]=[C][C]=[C]1              | -8 |
| 10094337<br>9 | C1(=[C][C]=C([C]=[C]1)C1=[C]C(=O)C2=[C][C]=[C][C]=C2O1)S(=O)(=O)N([C][C])[C][C]      | -8 |
| 86606987      | C1(=[C][C]=C2C(=O)[C]=C(OC2=[C]1)C1=[C]C(=C(C(=[C]1)O[C])O[C])O[C])O[C][C]1O[C]1     | -8 |
| 86083806      | O1[C]2[C]=[C][C]=[C]C2=[C][C]=C1C1=[C][C]=C([C]=[C]1)NC(=O)[C]                       | -8 |
| 73265447      | C1(=[C]OC2=C([C]=[C]C(=C2[C])O)C1=O)C1=[C][C]=C([C]=[C]1)C(F)(F)F                    | -8 |
| 70696494      | O1C2=[C]C(=[C]C(=C2C(=O)[C][C]1C1=[C]C(=[C]C(=[C]1)O)O)O)O[C]                        | -8 |
| 66968868      | C1(=[C][C]=c2c(=[C]1)c(=O)c(c(o2)C1=[C][C]=C([C]=[C]1)N([C][C])[C][C])O)[C]Br        | -8 |
| 54073202      | C1(=[C]C2=C(C(=[C]1)O)C(=O)[C][C](O2)C1=[C]C(=C([C]=[C]1)O[C])O)O[C][C]Br            | -8 |
| 49788611      | o1c(c(c(=O)c2=C([C]=C(C(=c12)O[C])O[C])O)O)C1=[C]C2=C([C]=[C]1)O[C]O2                | -8 |
| 44260080      | o1c(c(c(=O)c2c(c3c(c(c12)O[C])O[C]O3)O[C])O[C])C1=[C]C2=C(C(=[C]1)O[C])O[C]O2        | -8 |
| 25232840      | O1C2=C(C(=[C]C(=[C]2)O)O)[C][C][C]1C1=[C][C]=C([C]=[C]1)O[C]                         | -8 |
| 24721178      | o1c(c(c(=O)c2[C]=[C]C(=C(c12)O)O)O)C1=[C][C]=[C][C]=C1O                              | -8 |
| 23724666      | C1(=[C]OC2=[C]C(=[C][C]=C2C1=O)O)C1=[C]C2=C(O[C]O2)[C]=C1O                           | -8 |
| 21291576      | O1[C]=C(C(=O)C2=C([C]=C([C])C(=C12)O)C1=[C][C]=C([C]=[C]1)O                          | -8 |
| 20394006      | o1c([C])c(c(=O)c2=C([C]=C([C]=c12)OC(=O)[C])OC(=O)[C])C1=[C][C]=[C][C]=[C]1          | -8 |
| 18702583      | O1C(=[C]C(=O)C2=C(C(=[C][C]=C12)O[C])O)C1=[C]C(=C([C]=[C]1)O)O                       | -8 |

|                 |                                                                                                            |    |
|-----------------|------------------------------------------------------------------------------------------------------------|----|
| <b>18324974</b> | c1(c(=O)c2=[C][C]=[C][C]=c2oc1C1=[C][C]=C([C]=[C]1)S(=O)(=O)[C])C1=[C][C]=C(Cl)[C]=[C]1                    | -8 |
| <b>18324902</b> | c1(c(c(=O)c2=[C][C]=[C][C]=c2o1)C1=[C][C]=C([C]=[C]1)F)C1=[C][C]=C([C]=[C]1)S(=O)(=O)[C]                   | -8 |
| <b>16213663</b> | O1C(=[C]C(=C2[C]=[C]C(=[C][C]12)N([C][C])[C][C])C1=C([C]=[C][C]=[C]1)C(=O)O)C1=[C][C]=C([C]=[C]1)N([C])[C] | -8 |
| <b>14886014</b> | o1c2=C(C(=[C]C(=c2c(=O)c(c1C1=[C]C2=C([C]=[C]1)O[C]O2)O[C])O[C])O[C])O[C]                                  | -8 |
| <b>14791392</b> | O1C2=C([C]=[C]C(=[C]2)O)C(=O)[C]=C1C1=[C][C]=C([C]=[C]1)N                                                  | -8 |
| <b>14730798</b> | O1C2=[C]C(=[C][C]=C2C(=O)[C]([C]1C1=[C][C]=[C][C]=[C]1)O)O                                                 | -8 |
| <b>14704648</b> | o1c(c(c(=O)c2C(=C3C(=[C]c12)O[C]O3)O[C])O[C])C1=[C]C(=C2C(=[C]1)O[C]O2)O[C]                                | -8 |
| <b>14440496</b> | o1c2[C]=C([C]=[C]c2c(=O)c(c1C1=C([C]=[C][C]=[C]1)O[C])O)O[C]                                               | -8 |
| <b>13889022</b> | O1C(=[C]C(=O)C2=C1C(=C([C]=C2O)O[C])O[C])C1=C([C]=[C][C]=C1O[C])O                                          | -8 |
| <b>13873818</b> | O1C(=[C]C(=O)C2=C(C(=C([C]=C12)O[C]C1=[C][C]=[C][C]=[C]1)O[C])O[C])C1=[C]C(=C([C]=[C]1)O[C])O[C]           | -8 |
| <b>12444947</b> | C1(=[C]C2=C(C(=O)C(=[C]O2)C2=[C][C]=C([C]=[C]2)O[C])[C]=C1O[C])O[C]1O[C]([C]([C]([C]1O)O)O)[C]O            | -8 |
| <b>12318033</b> | O1C2=[C][C]=[C][C]=C2[C]C(=O)[C]1C1=[C][C]=[C][C]=[C]1                                                     | -8 |
| <b>12310757</b> | C1(=C([C]=C(c2c(=O)c(c(oc12)C1=[C][C]=C([C]=[C]1)O[C])O)O)O)[C][C]C([C])([C])O                             | -8 |
| <b>11777425</b> | O1C(=[C]C(=O)C2=[C]C(=[C][C]=C12)[C]C#N)C1=[C][C]=[C][C]=[C]1                                              | -8 |
| <b>11609345</b> | O1C(=[C]C(=O)c2c(c(c(c12)O[C])O)O[C])O)C1=[C][C]=[C][C]=[C]1                                               | -8 |
| <b>11289628</b> | O1C2=[C]C(=[C]C(=C2C(=O)[C][C]1C1=[C]C(=[C]C(=[C]1)O)O)O)O[C]                                              | -8 |
| <b>10759582</b> | O1C2=[C]C(=C(C(=C2C(=O)[C][C]1C1=[C][C]=C([C]=[C]1)O)O)C([C])([C])[C]=[C])O                                | -8 |
| <b>10643413</b> | Br c1c(=O)c2=[C][C]=[C][C]=c2oc1C1=[C][C]=C([C]=[C]1)S(=O)(=O)[C]                                          | -8 |
| <b>10542374</b> | O1[C]=C(C(=O)C2=C1C(=C([C]=C2O)O)O)C1=[C][C]=C(C(=[C]1)O)O                                                 | -8 |
| <b>10491973</b> | O1C(=[C]C(=O)C2=C1[C]=[C][C]=C2O[C][C])C1=[C][C]=[C][C]=[C]1                                               | -8 |
| <b>9864504</b>  | c1(c(c(=O)c2=[C][C]=[C][C]=c2o1)C1=[C][C]=[C][C]=[C]1)C1=[C][C]=C([C]=[C]1)S(=O)(=O)N                      | -8 |
| <b>6028923</b>  | C1(=[C]C(=O)C2=[C][C]=C([C]=C2O1)O)C1=[C][C]=C(Br)[C]=[C]1                                                 | -8 |
| <b>5748553</b>  | o1c(c(c(=O)c2=C([C]=C(C(=c12)O[C])O)O)O[C])C1=[C]C(=C([C]=[C]1)O)O                                         | -8 |
| <b>5492944</b>  | O1[C]=C(C(=O)C2=C1C(=C([C]=C2O)O)O)C1=[C][C]=C([C]=[C]1)O                                                  | -8 |
| <b>5481647</b>  | O1C(=[C]C(=O)C2=C(C(=C([C]=C12)O)O[C])O[C])C1=[C][C]=[C][C]=[C]1                                           | -8 |
| <b>5468257</b>  | O1C2=[C][C]=[C][C]=C2[C]([C][C]1C1=[C][C]=[C][C]=[C]1)N]N                                                  | -8 |
| <b>5395695</b>  | o1c([C])c(c(=O)c2=C([C]=C([C]=c12)O)O)C1=[C][C]=[C][C]=[C]1                                                | -8 |
| <b>5321538</b>  | O1C2=C([C]=C(C(=[C]2)O)O[C])C(=O)[C][C]1C1=[C]C(=C([C]=[C]1)O)O                                            | -8 |
| <b>5317747</b>  | O1C2=[C]C(=[C]C(=C2C(=O)[C]([C]1C1=[C][C]=[C][C]=[C]1)O)O)O[C]                                             | -8 |

|         |                                                                                            |    |
|---------|--------------------------------------------------------------------------------------------|----|
| 5317652 | O1C2=[C][C]=C(C=C2[C]=[C]C1([C])[C])O)C1=[C]OC2=C([C]=[C]C(=[C]2)O)C1=O                    | -8 |
| 5284649 | O1[C]=C(C(=O)C2=[C]C(=[C]([C]=C12)O)O)C1=[C][C]=C([C]=[C]1)O                               | -8 |
| 5281607 | O1C(=[C]C(=O)C2=C([C]=C([C]=C12)O)O)C1=[C][C]=[C][C]=[C]1                                  | -8 |
| 5281603 | o1c(c(c(=O)c2=C(C(=C([C]=c12)O)O[C])O)O[C])C1=[C][C]=C(C(=[C]1)O)O                         | -8 |
| 5280681 | o1c2=[C]C(=[C]C(=c2c(=O)c(c1C1=[C]C(=[C]([C]=[C]1)O)O)O[C])O)O                             | -8 |
| 5280362 | c1(c(=O)c2C(=[C]C(=[C]c2oc1C1=[C]C(=[C]([C]=[C]1)O)O)O)O)OS([O])([O])O                     | -8 |
| 5280343 | o1c(c(c(=O)c2C(=[C]C(=[C]c12)O)O)O)C1=[C][C]=C(C(=[C]1)O)O                                 | -8 |
| 5106787 | O1C2=C([C]=C([C]=[C]2)O)C(=O)[C][C]1C1=[C][C]=[C][C]=C1O                                   | -8 |
| 4872981 | O1C2=C(C(=[C]C(=[C]2)O[C])O)C(=O)[C][C]1C1=[C]C(=[C]([C]=[C]1)O)O                          | -8 |
| 4183640 | C1(=[C]C2=C([C]=[C]1)C(=O)C(=[C]O2)C1=[C][C]=C([C]=[C]1)O)O[C]1O[C]([C]([C]([C]1O)O)O)[C]O | -8 |
| 4169706 | FC1=[C]C2=C([C]=[C]1)O[C]([C]C2=O)C1=[C][C]=[C][C]=[C]1                                    | -8 |
| 3070245 | c1(c([C])c(=O)c2[C]=[C]C(=C(c2o1)[C]N([C])[C])O[C])C1=[C][C]=C(Cl)[C]=[C]1                 | -8 |
| 911486  | o1c2=[C]C(=[C][C]=c2c(=O)c(c1[C])C1=[C][C]=C([C]=[C]1)N(=O)=O)O[C]                         | -8 |
| 688836  | o1c(c(c(=O)c2=[C][C]=C([C]=c12)O[C])O)C1=[C]C(=[C][C]=[C]1)O[C]                            | -8 |
| 555407  | o1c(nc(=O)c2=[C][C]=[C][C]=c12)C1=[C][C]=[C][C]=[C]1                                       | -8 |
| 471706  | O1[C]=C(C(=O)C2=[C]C(=[C]([C]=C12)OC(=O)[C])OC(=O)[C])C1=[C][C]=C([C]=[C]1)OC(=O)[C]       | -8 |
| 466277  | BrC1=[C][C]=C2C(=O)[C]=C(OC2=[C]1)C1=[C][C]=[C][C]=[C]1                                    | -8 |
| 462691  | O1C2=C([C]=[C][C]=C2C(=O)[C][C]1C1=[C][C]=[C][C]=[C]1)[C]C(=O)O                            | -8 |
| 455313  | o1c2[C]=[C][C]=[C]c2c(=O)c(c1C1=C([C]=[C][C]=[C]1)O)O                                      | -8 |
| 369599  | O1C(=[C]C(=O)C2=C(C(=C([C]=C12)O[C])[C])O)C1=[C][C]=[C][C]=[C]1                            | -8 |
| 348130  | O1C2=[C]C(=[C]C(=C2C(=O)[C][C]1C1=[C][C]=C([C]=[C]1)O)O)O[C]                               | -8 |
| 250312  | O1C(=[C]C(=C2[C][C]=[C][C]=C12)[N]O)C1=[C][C]=[C][C]=[C]1                                  | -8 |
| 213728  | O1C(=[C]C(=O)C2=C1C(=[C][C]=[C]2)O[C])C1=[C][C]=[C][C]=[C]1                                | -8 |
| 194690  | O1C(=[C]C(=O)C2=[C]C(=[C]C(=C12)O[C])O[C])C1=[C][C]=[C][C]=[C]1                            | -8 |
| 182026  | O1C2=C(C(=C(C(=[C]2)O)[C])O)C(=O)[C]([C]1C1=[C]C(=[C]([C]=[C]1)O)O)O                       | -8 |
| 161860  | O1C2=C([C]=[C][C]=[C]2)C(=O)[C]=C1C1=[C][C]=[C][C]=C1O                                     | -8 |
| 147157  | O1C(=[C]C(=O)C2=[C]C(=[C][C]=C12)O[C])C1=[C][C]=[C][C]=[C]1                                | -8 |
| 97214   | O1C(=[C]C(=O)C2=C1[C]=C(C(=C2O)O[C])O[C])C1=[C][C]=C(C(=[C]1)O)O[C]                        | -8 |
| 88881   | O1C(=[C]C(=O)C2=C1[C]=C([C]=C2O[C])O[C])C1=[C][C]=[C][C]=[C]1                              | -8 |

|                             |                                                                                                       |      |
|-----------------------------|-------------------------------------------------------------------------------------------------------|------|
| <b>73571</b>                | <chem>O1C2=[C]C(=[C]C(=C2C(=O)[C][C]1C1=[C][C]=C([C]=[C]1)O)O)O[C]</chem>                             | -8   |
| <b>11349</b>                | <chem>o1c2=[C][C]=[C][C]=c2c(=O)c(c1C1=[C][C]=[C][C]=[C]1)O</chem>                                    | -8   |
| <b>10185</b>                | <chem>O1C2=[C]C(=[C]C(=C2C(=O)[C]([C]1C1=[C][C]=C(C(=[C]1)O)O)O)O)O</chem>                            | -8   |
| <b>1686</b>                 | <chem>C1(=[C]C(=O)C2=[C][C]=[C][C]=C2O1)C1=[C][C]=C(Br)[C]=[C]1</chem>                                | -8   |
| <b>13512149</b><br><b>8</b> | <chem>c1(c(c(=O)c2C(=[C][C]=[C]c2o1)O)O)C1=[C]C(=C2C(=[C]1)[C]2)O[C]</chem>                           | -7.9 |
| <b>12984453</b><br><b>1</b> | <chem>O1C2=[C]C(=[C]C(=C2C(=O)[C@@]([C])([C]1C1=[C][C]=C(C(=[C]1)[C])O)O)O)O</chem>                   | -7.9 |
| <b>12982239</b><br><b>0</b> | <chem>O1C(=[C]C(=O)c2c(c(c(c12)N(=O)=O)OC(=O)[C])OC(=O)[C])OC(=O)[C])C1=[C][C]=[C][C]=[C]1</chem>     | -7.9 |
| <b>12978776</b><br><b>5</b> | <chem>O1C(=[C]C(=C2[C][C]=[C][C]=C12)[N]N)C1=[C][C]=[C][C]=[C]1</chem>                                | -7.9 |
| <b>12973416</b><br><b>4</b> | <chem>o1c(c(c(=O)c2c(c(c(c12)O)O[C])O[C])O[C])O)C1=[C][C]=[C][C]=C1O</chem>                           | -7.9 |
| <b>12972874</b><br><b>3</b> | <chem>c1(c(c(=O)c2=[C][C]=[C][C]=c2o1)C1=[C][C]=[C][C]=[C]1)[C]1O[C]([C]([C]([C]1O)O)O)[C]O</chem>    | -7.9 |
| <b>12971614</b><br><b>9</b> | <chem>C1(=C([C]=C2C(=C1O)C(=O)C(=[C]O2)C1=[C][C]=C([C]=[C]1)O)O)[C]([C]1O[C]1)[C][C]=C([C])[C]</chem> | -7.9 |
| <b>12970411</b><br><b>8</b> | <chem>O1C(=[C]C(=O)C2=C([C]=C([C]=C12)O[C]O)O[C]O)C1=[C][C]=[C][C]=[C]1</chem>                        | -7.9 |
| <b>12967047</b><br><b>6</b> | <chem>O1C2=C([C])[C]=[C]C(=C2C(=O)[C][C]1C1=[C][C]=[C][C]=[C]1)[C]O</chem>                            | -7.9 |
| <b>10174053</b><br><b>8</b> | <chem>C1(=[C]C2=C(C(=O)[C]=C(O2)C2=[C][C]=[C][C]=[C]2)C(=C1O[C])O)OS([O])([O])O</chem>                | -7.9 |
| <b>10121493</b><br><b>7</b> | <chem>o1c(c(c(=O)c2[C]=C([C]=[C]c12)[C]N([C][C])[C][C])O)C1=[C][C]=C([C]=[C]1)N([C][C])[C][C]</chem>  | -7.9 |
| <b>86641845</b>             | <chem>O1C(=[C]C(=O)C2=C1[C]=C([C]=C2O)O[C]C#[C])C1=[C][C]=C(C(=[C]1)O[C])O[C]</chem>                  | -7.9 |
| <b>86236608</b>             | <chem>C1(=[C]C2=C([C]=[C]1)C(=O)[C]=C(O2)C1=[C]C(=[C]C(=[C]1)O[C])O[C])O[C][C]1O[C]1</chem>           | -7.9 |
| <b>69033169</b>             | <chem>C1(=[C]C2=C([C]=[C]1)C(=O)[C]=C(O2)C1=[C]C(=C(C(=[C]1)O[C])O[C])O[C])O[C][C]Br</chem>           | -7.9 |
| <b>69030799</b>             | <chem>C1(=[C]C2=C([C]=[C]1)C(=O)[C]=C(O2)C1=[C]C(=C(C(=[C]1)O[C])O[C])O[C])O[C][C][C]Br</chem>        | -7.9 |

|          |                                                                                      |      |
|----------|--------------------------------------------------------------------------------------|------|
| 69030155 | C1(=[C][C]=C2C(=O)[C]=C(OC2=[C]1)C1=[C]C(=[C]C(=[C]1)O[C])O[C])O[C][C][C]Br          | -7.9 |
| 56649088 | O1C(=[C]C(=O)C2=C(C(=C([C]=C12)O[C][C]=[C])O)O)C1=[C][C]=[C][C]=[C]1                 | -7.9 |
| 25073757 | O1C2=[C]C(=[C]C(=C2C(=O)[C][C]1C1=C([C]=[C]C(=[C]1)O)O)O)O                           | -7.9 |
| 22134047 | o1c(c(c(=O)c2C=C([C]=[C]c12)O[C])O[C])O)C1=[C][C]=[C][C]=[C]1                        | -7.9 |
| 21673114 | O1C(=[C]C(=O)C2=C1[C]=C([C]=C2O)O[C]O[C])C1=[C][C]=[C][C]=[C]1                       | -7.9 |
| 17585058 | C1(=[C][C]=C2C(=O)C(=[C]OC2=[C]1)C1=[C][C]=[C][C]=[C]1)O[C][C]Br                     | -7.9 |
| 14504257 | C1(=C(C(=[C]C(=C1C1=[C]OC2=C([C]=[C]C(=[C]2)O)C1=O)O)O)O[C])[C][C]C([C])([C])O       | -7.9 |
| 13942548 | o1c(c(c(=O)c2c(c3c(c(c12)O[C])O[C]O3)O[C])O[C])C1=[C]C2=C([C]=[C]1)O[C]O2            | -7.9 |
| 13886894 | O1C2=[C]C(=[C][C]=C2[C]([C]([C]1C1=[C][C]=C([C]=[C]1)O)O)O)O                         | -7.9 |
| 13568446 | o1c2[C]=[C][C]=[C]c2c(=O)c(c1C1=[C][C]=[C][C]=[C]1)C(=O)[C]                          | -7.9 |
| 12000157 | O1C2=[C]C(=[C]C(=C2C(=O)[C][C]1C1=[C][C]=C([C]=C1O)O)O)O[C]                          | -7.9 |
| 11499970 | O1C2=C([C]=[C][C]=[C]2)C(=O)[C][C]1C1=[C][C]=C([C]=[C]1)N([C])[C]                    | -7.9 |
| 11033582 | O1C2=C(C(=[C][C]=C2[C][C]([C]1C1=[C][C]=C(C(=[C]1)O)O)O)O)O                          | -7.9 |
| 10761665 | O1C2=[C]C(=C(C(=C2C(=O)[C][C]1C1=[C][C]=C(C(=[C]1)O[C])O)O)C([C])([C])[C]=[C])O      | -7.9 |
| 10468234 | O1C2=[C][C]=[C][C]=C2C(=O)[C@@]([C])([C]1C1=[C][C]=C([C])[C]=[C]1)O                  | -7.9 |
| 10315196 | O1C2=C(C(=C(C(=[C]2)O)C([C])([C])[C]=[C])O)C(=O)[C][C]1C1=[C][C]=C([C]=[C]1)O        | -7.9 |
| 5487855  | o1c2[C]=C([C]=C(c2c(=O)c(c1C1=[C][C]=C(C(=[C]1)O[C])O[C])O)O)O                       | -7.9 |
| 5385091  | C1(=[C]OC2=C([C]=[C]C(=[C]2)O)C1=O)C1=[C]C2=C(O[C]O2)[C]=C1O[C]                      | -7.9 |
| 5380976  | o1c2=[C]C(=[C][C]=c2c(=O)c(c1[C])C1=[C][C]=[C][C]=[C]1)O                             | -7.9 |
| 5378260  | O1[C]=C(C(=O)C2=C1C(=C([C]=[C]2)O)O)C1=[C][C]=C([C]=C1O)O                            | -7.9 |
| 5362017  | o1c(c(c(=O)c2C(=[C]C(=C(c12)O)O)O)O)C1=[C][C]=[C][C]=[C]1                            | -7.9 |
| 5360930  | o1c(c(c(=O)c2=C([C]=C(C(=c12)O)O)O)O[C])C1=[C][C]=[C][C]=[C]1                        | -7.9 |
| 5351234  | O1C2=C(C(=[C]C(=[C]2)O)O)C(=O)[C]=C1C1=[C]C(=[C]=[C]1)O[C])O[C]                      | -7.9 |
| 5322009  | O1C(=[C]C(=O)C2=C1[C]=C(C(=C2OC(=O)[C])O[C])OC(=O)[C])C1=[C][C]=C([C]=[C]1)OC(=O)[C] | -7.9 |
| 5320287  | o1c(c(c(=O)c2=C([C]=C([C]=c12)O[C])O)O)C1=[C]C(=[C]=[C]1)O[C]O                       | -7.9 |
| 5316653  | O1[C]=C(C(=O)C2=C1[C]=C1C(=C2O)O[C]O1)C1=[C]C(=C(C(=[C]1)O)O[C])O[C]                 | -7.9 |
| 5315202  | O1C(=[C]C(=O)C2=C1[C]=C([C]=C2O[C])O)C1=[C][C]=C([C]=[C]1)O                          | -7.9 |
| 5282154  | o1c2=[C]C(=[C]C(=c2c(=O)c(c1C1=[C]C(=C(C(=[C]1)O)O)O[C])O)O)O                        | -7.9 |
| 5281804  | O1[C]=C(C(=O)C2=C1[C]=C([C]=C2O)O[C])C1=[C][C]=C([C]=[C]1)O                          | -7.9 |

|               |                                                                                  |      |
|---------------|----------------------------------------------------------------------------------|------|
| 5281801       | O1[C]=C(C(=O)C2=C([C]=C([C]=C12)O)O)C1=[C][C]=C(C(=[C]1)O)O                      | -7.9 |
| 5281779       | O1[C]=C(C(=O)C2=C(C3=C([C]=C12)O[C]O3)O)C1=[C][C]=C([C]=[C]1)O                   | -7.9 |
| 5281708       | O1[C]=C(C(=O)C2=C1[C]=C([C]=[C]2)O)C1=[C][C]=C([C]=[C]1)O                        | -7.9 |
| 5281702       | O1C2=C(C(=[C]C(=[C]2)O)O)C(=O)[C]=C1C1=[C]C(=C(C(=[C]1)O[C])O)O[C]               | -7.9 |
| 5281697       | O1C(=[C]C(=O)C2=C1[C]=C(C(=C2O)O)O)C1=[C][C]=C([C]=[C]1)O                        | -7.9 |
| 5280378       | O1[C]=C(C(=O)C2=C1[C]=C([C]=[C]2)O)C1=[C][C]=C([C]=[C]1)O[C]                     | -7.9 |
| 5271991       | O1C(=[C]C(=O)C2=C1C(=C([C]=C2O)O)O[C])C1=C(C(=[C][C]=C1O)O)O[C]                  | -7.9 |
| 3080750       | O1C(=[C]C(=O)c2c(c(c(c12)O[C])O[C])O[C])O)C1=[C][C]=C(C(=[C]1)O)O[C]             | -7.9 |
| 3070241       | c1(c([C])c(=O)c2=[C][C]=C(C(=c2o1)[C]N([C][C])[C][C])O[C])C1=[C][C]=C(F)[C]=[C]1 | -7.9 |
| 688827        | o1c2=[C][C]=[C][C]=c2c(=O)c(c1c1=[C]C(=C(C(=[C]1)O[C])O[C])O[C])O                | -7.9 |
| 586090        | O1C2=C(C(=[C][C]=[C]2)O)C(=O)[C][C]1C1=[C][C]=[C][C]=[C]1                        | -7.9 |
| 513103        | O1C2=[C][C]=[C][C]=C2C(=O)[C]([C]1)[C]C1=[C][C]=[C][C]=[C]1                      | -7.9 |
| 439533        | O1C2=C(C(=[C]C(=[C]2)O)O)C(=O)[C]([C]1C1=[C]C(=C([C]=[C]1)O)O)O                  | -7.9 |
| 369608        | O1C2=C([C]=C([C]=C2[C]([C][C]1C1=[C][C]=[C][C]=[C]1)O)[C][C]=[C])O[C]            | -7.9 |
| 265699        | o1c(c(c(=O)c2[C]=[C]C(=[C]c12)O[C])O)C1=[C][C]=C([C]=[C]1)O[C]                   | -7.9 |
| 125540        | ClC1=C2C(=C([C]=C1O)O)C(=O)[C]([C])[C](O2)C1=[C][C]=C([C]=[C]1)O                 | -7.9 |
| 125526        | O1C2=C(C(=[C]C(=[C]2)O)O)C(=O)[C]([C])[C]1C1=[C][C]=C([C]=[C]1)O                 | -7.9 |
| 68112         | O1C(=[C]C(=O)C2=C1[C]=[C][C]=C2O)C1=[C][C]=[C][C]=[C]1                           | -7.9 |
| 31161         | O1C(=[C]C(=O)C2=C1[C]=C(C(=C2O)O)O[C])C1=[C][C]=C(C(=[C]1)O)O                    | -7.9 |
| 3078          | o1c(c([C])c(=O)c2[C]=[C]C(=C(c12)[C]N([C])[C])O[C])C1=[C][C]=[C][C]=[C]1         | -7.9 |
| 13251736<br>8 | O1C(=[C]C(=O)c2c(c([C])c(c(c12)C([C])([C])O)O[C])O)C1=[C][C]=C([C]=[C]1)O[C]     | -7.8 |
| 13227966<br>3 | O1[C]=C(C(=O)C2=C1[C]=C(C(=C2O[C])O[C])O)C1=C2C(=[C][C]=[C]1)O[C]O2              | -7.8 |
| 12988748<br>1 | o1c(c(c(=O)c2C(=C([C]=[C]c12)O)O[C])C1=[C][C]=[C][C]=[C]1)O[C]                   | -7.8 |
| 12984795<br>9 | O1C2=C([C]=[C]C(=C2O)O)[C]([C]([C]1C1=[C][C]=C([C]=[C]1)O)O)O                    | -7.8 |



|               |                                                                                                |      |
|---------------|------------------------------------------------------------------------------------------------|------|
| 12983719<br>5 | o1c(c(c(=O)c2c(c(c(c12)O)O)O)O[C])O[C])C1=[C][C]=[C][C]=C1O                                    | -7.8 |
| 12982451<br>0 | O1C(=[C]C(=O)C2=C1C(=C([C]=C2O[C])O[C])C1=[C]C(=C(C(=[C]1)O[C])O[C])O[C])C1=[C][C]=[C][C]=[C]1 | -7.8 |
| 12971122<br>2 | O1C2=C([C]C(=O)[C]=[C]2)[C][C][C]1C1=[C][C]=[C][C]=[C]1                                        | -7.8 |
| 10232003<br>9 | O1[C]=C(C(=O)c2c(c(c(c12)O)O)O[C])O[C])C1=[C]C(=C([C]=[C]1)O)O[C]                              | -7.8 |
| 10214569<br>8 | O1C2=C([C]=C(C(=[C]2)O[C])O)C(=O)[C][C]1C1=[C][C]=C(C(=[C]1)O)O                                | -7.8 |
| 10189069<br>3 | O1c2c([C])c(c([C])c(c2C(=O)[C][C]1C1=[C][C]=[C][C]=[C]1)O[C])O                                 | -7.8 |
| 10162437<br>3 | O1C2=[C]C(=[C][C]=C2[C]([C][C]1C1=[C][C]=[C][C]=[C]1)O)O[C]                                    | -7.8 |
| 10159128<br>1 | C1(=C(c2c(C(=[C]1)O[C])c(=O)c(c(o2)C1=[C][C]=C(C(=[C]1)O[C])O)O[C])O[C])O[C][C][C][C][C]       | -7.8 |
| 10158423<br>2 | O1C2=C(C(=[C]C(=C2C(=O)[C][C]1C1=[C][C]=[C][C]=[C]1)O[C])O[C])/[C]=[C]/C(=[C])[C]              | -7.8 |
| 71586772      | O1C(=[C]C(=O)C2=C(C(=C([C]=C12)OC(=O)[C])O[C])OC(=O)[C])C1=[C][C]=[C][C]=[C]1                  | -7.8 |
| 56648912      | O1C(=[C]C(=O)C2=C1[C]=C(C(=C2OC(=O)[C])OC(=O)[C])O[C][C]=[C])C1=[C][C]=[C][C]=[C]1             | -7.8 |
| 54728923      | o1c(=O)c(c(c2C(=[C]C(=[C]c12)O)O)O)C1=[C][C]=C([C]=[C]1)O                                      | -7.8 |
| 53796934      | O1[C]=C(C(=O)C2=C([C]=C([C]=C12)O[C])O)C1=[C][C]=C([C]=C1O)O[C]                                | -7.8 |
| 21315732      | O1C2=C([C]=C([C]=[C]2)C(=O)O[C][C])C(=O)[C]=C1C1=[C]C(=[C][C]=C1O[C]([C])[C])[C]               | -7.8 |
| 19972541      | o1c(c([C])c(=O)c2[C]=[C][C]=C(c12)C(=O)O[C][C])C1=[C][C]=[C][C]=[C]1                           | -7.8 |
| 15761525      | O1C2=[C][C]=[C][C]=C2C(=O)C([C]1C1=[C][C]=[C][C]=[C]1)([C]O)[C]O                               | -7.8 |
| 15126657      | O1[C]=C(C(=O)C2=C1C(=C([C]=[C]2)O)[C])C1=[C][C]=C([C]=[C]1)O                                   | -7.8 |
| 14057034      | O1C2=C(C3=C(C(=[C]2)O)C(=O)C(=[C]O3)C2=[C]C(=C([C]=C2O[C])O)O[C])[C]=[C]C1([C])[C]             | -7.8 |
| 13916267      | o1c(c(c(=O)c2=C([C]=C(C(=c12)O[C])O)O[C])O[C])C1=[C]C(=C([C]=[C]1)O[C])O[C]                    | -7.8 |
| 11772232      | O1C(=[C]C(=O)C2=C1[C]=C([C]=C2O)O[C]O[C][C]O[C])C1=[C][C]=[C][C]=[C]1                          | -7.8 |
| 10755200      | O1C2=C([C]=C([C]=[C]2)N)C(=O)[C]=C1C1=[C][C]=C([C]=[C]1)N([C])[C]                              | -7.8 |

|          |                                                                                   |      |
|----------|-----------------------------------------------------------------------------------|------|
| 10422310 | O1C(=[C]C(=O)C2=C1[C]=[C][C]=C2N)C1=[C][C]=C([C]=[C]1)N                           | -7.8 |
| 7454026  | O1[C]=C(C(=O)C2=[C][C]=C([C]=C12)O)C1=[C][C]=C([C]=[C]1)N(=O)=O                   | -7.8 |
| 6253276  | C1(=C(C(=[C]C(=C1C(=O)/[C]=[C]/C1=[C][C]=C([C]=[C]1)O[C])O)O[C])O[C])O[C]         | -7.8 |
| 5748605  | O1[C]=C(C(=O)C2=C1[C]=C([C]=[C]2)O)C1=[C]C(=C([C]=[C]1)O[C])O[C]                  | -7.8 |
| 5491412  | o1c2[C]=C([C]=C(c2c(=O)c(c1c1=[C]C(=C(C(=[C]1)O)O[C])O)O[C])O)O[C]                | -7.8 |
| 5466136  | o1c2[C]=C(C(=C(c2c(=O)c(c1c1=[C][C]=C2C(=[C]1)O[C]O2)O[C])O)O[C])O[C]             | -7.8 |
| 5465885  | O1C2=[C][C]=[C][C]=C2[C]([C][C]1C1=[C][C]=[C][C]=[C]1)[N]N                        | -7.8 |
| 5386297  | o1c(c(c(=O)c2C(=C(C(=[C]c12)O)O[C])O)C1=[C]C(=C([C]=C1O[C])O[C])O[C])C(=O)O       | -7.8 |
| 5383438  | o1c2=[C]C(=[C]C(=c2c(=O)c(c1c1=[C]C(=C([C]=[C]1)O[C])O[C])O[C])O)O                | -7.8 |
| 5381920  | O1C2=C([C]=[C]C(=[C]2)O)C(=O)[C]=C1C1=[C]C(=C(C(=[C]1)O[C])O[C])O[C]              | -7.8 |
| 5380905  | o1c2=[C]C(=[C]C(=c2c(=O)c(c1c1=[C]C(=C([C]=[C]1)O[C])O)O[C])O)O                   | -7.8 |
| 5379265  | O1C2=C(C(=[C]C(=[C]2)O)O)C(=O)[C]=C1C1=[C]C(=C(C(=[C]1)O[C])O[C])O[C]             | -7.8 |
| 5378210  | O1C(=[C]C(=O)C2=C1[C]=C([C]=C2O)O)C1=[C][C]=[C][C]=C1O[C]                         | -7.8 |
| 5377945  | o1c(c(c(=O)c2=C(C(=C([C]=c12)O)O[C])O)O)C1=[C][C]=C([C]=[C]1)O                    | -7.8 |
| 5376891  | O1[C]=C(C(=O)C2=C1[C]=C([C]=[C]2)O)C1=[C][C]=[C][C]=[C]1                          | -7.8 |
| 5353911  | O1[C]=C(C(=O)C2=C([C]=C(C(=C12)O[C])O)O)C1=[C][C]=C([C]=[C]1)O                    | -7.8 |
| 5352032  | o1c(c(c(=O)c2=C(C(=C([C]=c12)O)O[C])O)O[C])C1=[C][C]=C([C]=[C]1)O                 | -7.8 |
| 5352005  | o1c2=[C]C(=[C]C(=c2c(=O)c(c1c1=[C]C(=C([C]=[C]1)O[C])O[C])O[C])O)O[C]             | -7.8 |
| 5320945  | o1c(c(c(=O)c2C(=[C]C(=[C]c12)O[C])O)O)C1=[C][C]=C(C(=[C]1)O[C])O                  | -7.8 |
| 5320181  | O1C(=[C]C(=O)C2=C(C(=C([C]=C12)O)O)O)C1=[C]C(=C([C]=[C]1)O)O[C]                   | -7.8 |
| 5281695  | o1c(c(c(=O)c2=C(C(=C([C]=c12)O)O[C])O)O[C])C1=[C][C]=C([C]=[C]1)O[C]              | -7.8 |
| 5281654  | o1c2[C]=C([C]=C(c2c(=O)c(c1c1=[C][C]=C(C(=[C]1)O[C])O)O)O)O                       | -7.8 |
| 5280666  | O1C2=[C]C(=[C]C(=C2C(=O)[C]=C1C1=[C][C]=C(C(=[C]1)O[C])O)O)O                      | -7.8 |
| 5271551  | O1C2=C(C(=[C]C(=[C]2)O[C])O[C])C(=O)[C][C]1C1=[C][C]=C([C]=[C]1)O                 | -7.8 |
| 3245800  | C1(=[C]C(=O)C2=[C][C]=[C][C]=C2O1)C1=[C][C]=C([C]=[C]1)S[C]                       | -7.8 |
| 3084508  | O1C(=[C]C(=O)c2c(c(c(c12)O[C])O[C])O[C])O)C1=[C]C(=C(C(=[C]1)O)O[C])O             | -7.8 |
| 3070246  | c1(c([C])c(=O)c2=[C][C]=C(C(=c2o1)[C]N([C][C])[C][C])O[C])C1=[C][C]=C(CI)[C]=[C]1 | -7.8 |
| 2734290  | O1[C]=C(C(=O)C2=C1[C]=C([C]=C2[C])O[C])C1=[C][C]=[C][C]=[C]1                      | -7.8 |
| 2017481  | C1(=[C][C]=C2C(=O)C(=[C]OC2=[C]1)C1=[C][C]=[C][C]=[C]1)OS([C])([O])[O]            | -7.8 |

|               |                                                                                  |      |
|---------------|----------------------------------------------------------------------------------|------|
| 1241435       | O1C2=C([C]=[C][C]=[C]2)C(=O)[C]=C1C1=[C][C]=C([C]=[C]1)N([C])[C]                 | -7.8 |
| 736738        | O1C2=[C][C]=[C][C]=C2C(=O)[C]([C]1C1=[C][C]=[C][C]=[C]1)O                        | -7.8 |
| 632255        | O1C(=[C]C(=O)c2c(c(c(c12)O[C])O[C])O)O)C1=[C][C]=C(C(=[C]1)O[C])O[C]             | -7.8 |
| 631782        | o1c2[C]=C([C]=[C]c2c(=O)c(c1[C])C1=C([C]=C([C]=[C]1)O[C])O[C])O[C][C]=[C]        | -7.8 |
| 369612        | O1C2=C([C]=C([C]=C2[C]([C][C]1C1=[C][C]=C(C(=[C]1)O[C])O[C])O[C])[C][C]=[C])O[C] | -7.8 |
| 343083        | C1(=[C]OC2=C([C]=[C]C(=[C]2)O[C])C1=O)C1=[C]C2=C(O[C]O2)[C]=C1O[C]               | -7.8 |
| 321347        | O1C2=[C]C(=[C]C(=C2C(=O)[C][C]1C1=[C]C(=[C]=[C]1)O)O[C])O)O[C]                   | -7.8 |
| 246330        | O1C2=[C]C(=[C][C]=C2C(=O)[C]([C]1C1=[C][C]=C(C(=[C]1)O)O)O)O                     | -7.8 |
| 195603        | O1C2=C(C(=[C]C(=[C]2)O[C])O)C(=O)[C][C]1C1=C([C]=[C][C]=C1O)O                    | -7.8 |
| 188323        | O1C(=[C]C(=O)C2=C(C(=C([C]=C12)O[C])O[C])O)C1=[C][C]=C([C]=[C]1)O                | -7.8 |
| 177000        | o1c2=[C]C(=[C][C]=c2c(=O)c([C])c1C1=[C]C(=C(C(=[C]1)O[C])O[C])O[C])O[C]          | -7.8 |
| 160237        | O1C(=[C]C(=O)C2=C1[C]=C(C(=C2O)O[C])O[C])C1=[C][C]=C(C(=[C]1)O)O                 | -7.8 |
| 158311        | O1C(=[C]C(=O)C2=C1[C]=C(C(=C2O)O[C])O[C])C1=C([C]=C(C(=[C]1)O[C])O)O             | -7.8 |
| 153441        | O1C(=[C]C(=O)c2c(c(c(c12)O)O[C])O[C])O)C1=[C][C]=[C][C]=[C]1                     | -7.8 |
| 102674        | O1C2=[C][C]=[C][C]=C2[C]([C][C]1C1=[C][C]=[C][C]=[C]1)[N]N                       | -7.8 |
| 96539         | O1C(=[C]C(=O)c2c(c(c(c12)O[C])O[C])O[C])O)C1=[C][C]=C([C]=[C]1)O[C]              | -7.8 |
| 26034         | o1c(c(c(=O)c2=C([C]=C([C]=C12)O[C])O[C])O)C1=[C]C(=[C]=[C]1)O)O                  | -7.8 |
| 9064          | O1C2=[C]C(=[C]C(=C2[C][C]([C]1C1=[C][C]=C(C(=[C]1)O)O)O)O)O                      | -7.8 |
| 471           | O1C2=[C]C(=[C]C(=C2C(=O)[C]([C]1C1=[C]C(=[C]=[C]1)O)O)O)O)O                      | -7.8 |
| 13959263<br>0 | O1C2=C([C]=[C]C(=[C]2)O)[C]2[C][C]1[C]1[C][C]=[C][C](O[C]O2)[C]1                 | -7.7 |
| 13845452<br>9 | O1C2=[C][C]=[C][C]=C2C(=O)[C]([C@]1(C1=[C][C]=[C][C]=[C]1)OC(O)(O)O)O            | -7.7 |
| 12986426<br>5 | O1C2=C([C]=[C][C]=C2C(=O)[C][C@]1(C1=[C][C]=[C][C]=[C]1)O)O[C]                   | -7.7 |
| 12982238<br>6 | Brc1c(c(c(c2C(=O)[C]=C(Oc12)C1=[C][C]=[C][C]=[C]1)OC(=O)[C])OC(=O)[C])OC(=O)[C]  | -7.7 |
| 10233021<br>7 | O1C2=C([C]=[C]C(=[C]2)O[C])C(=O)[C]([C]1C1=[C][C]=C([C]=[C]1)O[C])O              | -7.7 |

|                             |                                                                                             |      |
|-----------------------------|---------------------------------------------------------------------------------------------|------|
| <b>10232161</b><br><b>0</b> | C1(=[C]OC2=[C]C(=[C]C(=C2C1=O)O)O)C1=C(C2=C(O[C]O2)[C]=[C]1)O[C]                            | -7.7 |
| <b>10201716</b><br><b>3</b> | o1c(c(c(=O)c2=C([C]=C(C(=c12)[C][C]C(=[C])[C])O)O)O)C1=[C][C]=[C][C]=[C]1                   | -7.7 |
| <b>10159128</b><br><b>2</b> | C1(=C(c2c(C(=[C]1)O[C])c(=O)c(c(o2)C1=[C][C]=C(C(=[C]1)O[C])O[C])O[C])O[C])O[C][C][C][C][C] | -7.7 |
| <b>10117916</b><br><b>5</b> | o1c(c(c(=O)c2=C([C]=C([C]=c12)O[C])O[C][C][C]O)O[C])C1=[C]C=C([C]=[C]1)O[C])O[C]            | -7.7 |
| <b>90000191</b>             | o1c(c(c(=O)c2c(c(c(c12)O[C])O[C])O[C])O)O)C1=C(C(=[C][C]=[C]1)O[C])O[C]                     | -7.7 |
| <b>74977227</b>             | O1C2=[C]C(=[C]C(=C2[C][C][C]1C1=[C][C]=C(C(=[C]1)O[C])O[C])O)O                              | -7.7 |
| <b>70253991</b>             | o1c(c(c(=O)c2c(c(c(c12)O)O[C])O[C])O)O)C1=[C][C]=[C][C]=[C]1                                | -7.7 |
| <b>69030367</b>             | O1C2=[C]C(=[C][C]=C2C(=O)[C]=C1C1=[C]C(=[C]C(=[C]1)O[C])O[C])O                              | -7.7 |
| <b>54140898</b>             | o1c(c(c(=O)c2=C(C(=[C][C]=c12)O[C][C])O[C][C])O[C][C])C1=[C][C]=[C][C]=[C]1                 | -7.7 |
| <b>44412009</b>             | O1C2=C([C])C(=[C]C(=C2C(=O)[C][C]1C1=[C][C]=[C][C]=[C]1)O[C])O[C]                           | -7.7 |
| <b>44266353</b>             | O1C2=[C][C]=[C][C]=C2C(=O)/C(=[C]/C2=[C][C]=N[C]=[C]2)/[C]1C1=[C][C]=[C][C]=[C]1            | -7.7 |
| <b>44259869</b>             | o1c(c(c(=O)c2=C(C(=C([C]=c12)O)O[C])O)O)C1=[C][C]=C(C(=[C]1)O[C])O[C]                       | -7.7 |
| <b>44258621</b>             | O1c2c3C(=O)[C]=C(Oc3c(c2[C]=[C]C1([C])[C])O[C])O[C])C1=[C]C(=C(C(=[C]1)O[C])O[C])O[C]       | -7.7 |
| <b>35028119</b>             | O1C(=[C]C(=O)c2c(c(c(c12)O[C])O[C])O[C])O[C])C1=[C][C]=[C]C(=[C]1)O[C]                      | -7.7 |
| <b>25068463</b>             | O1C2=[C]C(=[C]C(=C2[C]C(=O)[C]1C1=[C][C]=C(C(=[C]1)O[C])O[C])O[C])O[C]                      | -7.7 |
| <b>18324985</b>             | lc1c(=O)c2=[C][C]=[C][C]=c2oc1C1=[C][C]=C([C]=[C]1)S(=O)(=O)[C]                             | -7.7 |
| <b>15389441</b>             | O1C2=C([C]=C3C(=[C]2)O[C]=C(C3=O)C2=[C]C(=C([C]=C2O[C])O[C])O[C])[C]=[C]C1([C])[C]          | -7.7 |
| <b>14372618</b>             | O1C(=[C]C(=O)C2=C1[C]=C(C(=C2O[C])O)O[C])C1=[C][C]=[C][C]=[C]1                              | -7.7 |
| <b>14254494</b>             | O1[C]=C(C(=O)C2=C1[C]=C([C]=C2[C])O)C1=[C][C]=[C][C]=[C]1                                   | -7.7 |
| <b>13964544</b>             | O1C(=[C]C(=O)C2=C1[C]=C([C]=C2O[C])O)C1=[C][C]=C(C(=[C]1)O[C])O[C]                          | -7.7 |
| <b>13916278</b>             | o1c(c(c(=O)c2C(=[C]C(=C(c12)O[C])O)O)O[C])C1=[C][C]=C([C]=[C]1)O[C]                         | -7.7 |
| <b>12360936</b>             | O1C2=[C]C(=[C][C]=C2[C]([C][C]1C1=[C][C]=[C][C]=[C]1)O)O[C]                                 | -7.7 |
| <b>12241083</b>             | O1[C]=C(C(=O)C2=C1[C]=C([C]=C2O)O)C1=[C][C]=C([C]=[C]1)N(=O)=O                              | -7.7 |
| <b>12132943</b>             | O1c2c(c(c([C])c(c2C(=O)[C][C]1C1=[C][C]=[C][C]=[C]1)O)O[C])[C]=O                            | -7.7 |
| <b>12132870</b>             | O1[C]=C(C(=O)C2=C1[C]=C(C(=[C]2)O)O[C])C1=[C][C]=C([C]=[C]1)O[C]                            | -7.7 |

|          |                                                                                    |      |
|----------|------------------------------------------------------------------------------------|------|
| 11726019 | O1C(=[C]C(=O)c2c(c(c(c12)O)O[C])O[C])O)C1=[C][C]=C(C(=[C]1)O[C])O                  | -7.7 |
| 10594862 | Br1c(=O)c2=[C][C]=[C][C]=c2oc1C1=[C][C]=C([C]=[C]1)[S@@](=O)[C]                    | -7.7 |
| 5491643  | O1C(=[C]C(=O)C2=C(C(=C([C]=C12)O)O[C])O[C])C1=[C][C]=C(C(=[C]1)O[C])O[C]           | -7.7 |
| 5488781  | O1[C]=C(C(=O)C2=C1[C]=C(C(=C2O)O[C])O)C1=[C][C]=C(C(=[C]1)O)O[C]                   | -7.7 |
| 5386961  | o1c(c(c(=O)c2=C([C]=C(C(=c12)O[C])O)O)O[C])C1=[C]C=C([C]=[C]1)O)O[C]               | -7.7 |
| 5317287  | o1c(c(c(=O)c2=C(C(=C([C]=c12)O[C])O[C])O)O)C1=[C]C=C([C]=[C]1)O[C])O               | -7.7 |
| 5316900  | o1c2=[C]C(=[C]C(=c2c(=O)c(c1C1=[C]C=C([C]=[C]1)O)O[C])O[C])O)O                     | -7.7 |
| 5281706  | O1[C]=C(C(=O)C2=C([C]=C([C]=C12)O[C])O)C1=C([C]=C([C]=[C]1)O)O                     | -7.7 |
| 5281666  | o1c(c(c(=O)c2=C([C]=C([C]=c12)O)O)O)C1=[C][C]=C([C]=[C]1)O[C]                      | -7.7 |
| 5280373  | O1[C]=C(C(=O)C2=C1[C]=C([C]=C2O)O)C1=[C][C]=C([C]=[C]1)O[C]                        | -7.7 |
| 4303567  | O1C(=[C]C(=O)C2=C1[C]=C([C]=C2OC(=O)[C])OC(=O)[C])C1=[C][C]=C([C]=[C]1)O[C]        | -7.7 |
| 3825918  | o1c2[C]=[C][C]=[C]c2c(=O)c(c1C1=[C][C]=[C][C]=[C]1)N1[C]=NN=N1                     | -7.7 |
| 1666397  | o1c2=[C][C]=[C][C]=c2c(=O)c(c1C1=[C][C]=[C][C]=[C]1)OC(=O)[C]                      | -7.7 |
| 634113   | o1c2=[C]C(=[C]C(=c2c(=O)c(c1C1=[C]C=C(C(=[C]1)O[C])O[C])O[C])O[C])O[C])O[C]        | -7.7 |
| 631791   | o1c(c(c(=O)c2c(c(c3c([C]=[C]O3)c12)O[C])O[C])O[C])C1=[C][C]=[C][C]=[C]1            | -7.7 |
| 624789   | O1[C]=C(C(=O)C2=C1[C]=C(C(=[C]2)O[C])O[C])C1=[C][C]=[C][C]=[C]1                    | -7.7 |
| 602425   | O1C2=C(C(=[C][C]=C2C(=O)[C])([C]1C1=[C][C]=C(C(=[C]1)O[C])O[C])O[C])O[C]           | -7.7 |
| 586387   | O1C2=[C]C(=[C]C(=C2C(=O)[C])([C]1C1=[C][C]=C([C]=[C]1)O[C])O)O)O                   | -7.7 |
| 462696   | O1C2=[C]C(=[C]C(=C2C(=O)[C][C]1C1=[C]C=C(C(=[C]1)O[C])O[C])O[C])O)O                | -7.7 |
| 442621   | o1c(c(c(=O)c2C=C(C(=[C]c12)O[C])O)O)O[C])C1=[C][C]=C(C(=[C]1)O)O[C]                | -7.7 |
| 343081   | O1[C]=C(C(=O)C2=C1C1=C([C]=[C]2)O[C]O1)C1=[C]C=C([C]=[C]1)O[C])O[C]                | -7.7 |
| 331149   | O1C(=[C]C(=O)c2c(c(c(c12)O[C])O[C])O[C])O[C])C1=[C]C2=C(C(=[C]1)O[C])O[C]O2        | -7.7 |
| 147806   | O1C2=[C][C]=[C][C]=C2C(=O)[C]([C]1C1=[C][C]=[C][C]=[C]1)O                          | -7.7 |
| 129394   | O1c2c(c(c([C])c(c2[C]([C][C]1C1=[C][C]=[C][C]=[C]1)O)O[C])O)[C]=O                  | -7.7 |
| 49676    | o1c(c([C])c(=O)c2=[C][C]=C(C(=c12)[C]N([C][C])[C][C])O[C])C1=[C][C]=[C][C]=[C]1    | -7.7 |
| 41451    | C1(=[C][C]=C([C]=[C]1)c1c([C])c(=O)c2=[C][C]=[C][C]=c2o1)O[C][C](O)[C]N[C]([C])[C] | -7.7 |
| 13415942 | o1c2[C]=[C][C]=[C]c2c(=O)c(c1C1=C([C]=C(C(=[C]1)O)O)C(=O)O)C1=[C][C]=[C][C]=[C]1   | -7.6 |

|               |                                                                                                          |      |
|---------------|----------------------------------------------------------------------------------------------------------|------|
| 12988767<br>6 | O1C2=C([C]=C(C(=[C]2)O)O[C])C(=O)[C]([C]1C1=[C][C]=[C][C]=[C]1)O                                         | -7.6 |
| 12985870<br>7 | O1C2=C(C(=[C]C(=[C]2)O)O)C(=O)[C@]([C]1C1=[C]C=C([C]=[C]1)O)O)(O)O[C]                                    | -7.6 |
| 12985834<br>1 | O1C2=C([C]=[C]C(=C2O[C])O[C])C(=O)C([C@@]1(C1=[C][C]=[C][C]=[C]1)O)(O)O                                  | -7.6 |
| 12984454<br>3 | O1[C]=C(C(=O)c2c(c(c(c12)O)O)O[C])O)C1=[C]C=C(C(=[C]1)O)O[C])O[C]                                        | -7.6 |
| 12971122<br>0 | O1C2=C([C]=[C][C]C2=O)[C][C][C]1C1=[C][C]=[C][C]=[C]1                                                    | -7.6 |
| 12971080<br>8 | O1C2=[C][C]=[C][C]=C2C(=O)[C][C@@]1(C1=[C][C]=[C][C]=[C]1)/[C]=[C]/C(=[C])[C]                            | -7.6 |
| 12968025<br>6 | O1C2=[C][C]=[C][C]=C2[C]C([C]1C1=[C][C]=[C][C]=[C]1)(O)O                                                 | -7.6 |
| 12966151<br>7 | O1C2=[C]C(=[C]C(=C2[C](C(=O)[C]1C1=[C][C]=[C][C]=[C]1)O)O)O                                              | -7.6 |
| 12963357<br>8 | o1c(c(c(=O)c2[C]=[C]C=C(c12)O[C])O[C])O)C1=[C][C]=C(C(=[C]1)O[C])O[C]                                    | -7.6 |
| 10158423<br>6 | O1C2=C(C(=[C]C(=C2C(=O)[C][C]1C1=[C][C]=[C][C]=[C]1)O[C])O[C])/[C]=[C]\C([C])([C])O                      | -7.6 |
| 67743168      | O1C2=[C]C(=[C]C(=C2[C]([C]([C]1C1=[C]C(=[C][C]=[C]1)O)O)O)O)O                                            | -7.6 |
| 67425485      | C1(=[C]C2=C(C(=[C]1)O[C])C(=O)[C]=C(O2)C1=[C][C]=C(C(=[C]1)O[C])O[C])O[C]P(=O)([C]([C])[C])([C])([C])[C] | -7.6 |
| 57340185      | C1(=[C]C(=O)C2=C([C]=C([C]=[C]2)O)O1)C1=[C][C]=C(I)[C]=[C]1                                              | -7.6 |
| 54423602      | c1(c(c(=O)c2=[C][C]=[C][C]=c2o1)C1=[C][C]=[C][C]=[C]1)O[C]([C])[C]                                       | -7.6 |
| 51041990      | o1c2=[C]C(=[C]C(=c2c(=O)c(c1C1=[C]C(=[C]C(=C1[C][C]=C([C])([C])O)O[C])O[C])O)O                           | -7.6 |
| 44258304      | O1C(=[C]C(=O)C2=C1[C]=C([C]=C2O[C])O[C])C1=[C]C=C([C]=[C]1)O)O                                           | -7.6 |
| 44257206      | o1c([C])c(c(=O)c2=[C][C]=C(C(=c12)C(=O)[C])O)C1=[C][C]=[C][C]=[C]1                                       | -7.6 |
| 44257187      | O1C2=C(C(=[C]C(=C2[C][C]C([C])([C])O)O[C])O[C])[C][C][C]1C1=[C][C]=[C][C]=[C]1                           | -7.6 |
| 23786424      | O1C2=C(C(=[C]C(=C2O[C])O)O[C])C(=O)[C][C]1C1=[C][C]=[C][C]=[C]1                                          | -7.6 |
| 21270152      | O1[C]=C(C(=O)C2=[C][C]=C(C(=C12)[C])O)C1=[C][C]=C([C]=[C]1)N(=O)=O                                       | -7.6 |

|          |                                                                                       |      |
|----------|---------------------------------------------------------------------------------------|------|
| 16681753 | O1C(=[C]C(=O)C2=C1[C]=C(C(=C2O)O[C])O[C])C1=[C]C(=C(C(=[C]1)O[C])O)O[C]               | -7.6 |
| 14732294 | O1C2=[C]C(=[C]C(=C2[C][C]([C]1C1=[C][C]=C(C(=[C]1)O)O)O)O[C])O[C]                     | -7.6 |
| 14057036 | O1C2=C(C3=C(C(=[C]2)O)C(=O)C(=[C]O3)C2=[C]C(=C([C]=C2O[C])O[C])O[C])[C]=[C]C1([C])[C] | -7.6 |
| 13291608 | o1c(c(c(=O)c2C(=C(C(=[C]c12)O[C])O[C])O)O)C1=[C][C]=[C][C]=[C]1                       | -7.6 |
| 13045799 | O1C2=[C][C]=[C][C]=C2[C][C]([C]1C1=[C][C]=[C][C]=[C]1)OC(=O)[C]                       | -7.6 |
| 10665307 | BrC1c(=O)c2[C]=[C][C]=[C]c2oc1C1=[C][C]=C([C]=[C]1)S[C]                               | -7.6 |
| 10475482 | o1c(c(c(=O)c2c(c(c(c12)O[C])O[C])O[C])O)O)C1=[C]C(=C([C]=[C]1)O)O[C]                  | -7.6 |
| 9798295  | O1C2=C(C(=C(C(=[C]2)O[C])O[C])O[C])C(=O)[C][C]1C1=[C]C(=C([C]=[C]1)O)O                | -7.6 |
| 5491798  | o1c(c(c(=O)c2=C([C]=C(C(=c12)O[C])O[C])O)O)C1=[C][C]=[C][C]=[C]1                      | -7.6 |
| 5490001  | o1c2=[C]C(=[C][C]=c2c(=O)c(c1C1=[C]C(=C(C(=[C]1)O[C])O[C])O[C])O                      | -7.6 |
| 5381919  | O1C(=[C]C(=O)C2=C([C]=C([C])[C]=C12)O)C1=[C]C(=C(C(=[C]1)O[C])O[C])O[C]               | -7.6 |
| 5378391  | o1c([C])c(c(=O)c2=[C][C]=C(C(=c12)[C][C]=[C])O)C1=[C][C]=[C][C]=[C]1                  | -7.6 |
| 5281606  | c1(c(c(=O)c2C(=[C]C(=C(c2o1)O[C])O[C])O)O)C1=C(C(=[C][C]=[C]1)Cl)O                    | -7.6 |
| 5273755  | O1C(=[C]C(=O)C2=C1[C]=C(C(=C2O)O[C])O)C1=[C][C]=C(C(=[C]1)O[C])O[C]                   | -7.6 |
| 5272653  | O1C(=[C]C(=O)C2=C1[C]=C([C]=C2O)O[C])C1=[C][C]=C(C(=[C]1)O[C])O[C]                    | -7.6 |
| 3082330  | O1C2=C(C(=[C]C(=[C]2)O)O)C(=O)[C]([C]1C1=[C][C]=[C][C]=C1O)O                          | -7.6 |
| 2064449  | O1C2=C(C(=[C]C(=[C]2)O[C])O[C])C(=O)[C]([C]1C1=[C]C(=C([C]=[C]1)O[C])O[C])O           | -7.6 |
| 636642   | ClC1=C([C]=C2C(=C1O)[C][C]([C](O2)C1=[C][C]=C(C(=[C]1)O)O)O)O                         | -7.6 |
| 628555   | o1c2=[C]C(=[C][C]=c2c(=O)c(c1C1=[C][C]=C([C]=[C]1)O[C])O[C])O[C]                      | -7.6 |
| 493376   | O1C2=[C]C(=[C]C(=C2C(=O)[C]=C1C1=[C]C(=C(C(=[C]1)O[C])O[C])O[C])O[C]                  | -7.6 |
| 315709   | O1C(=[C]C(=O)C2=C1[C]=C(C(=[C]2)O[C])O[C])C1=[C][C]=C(C(=[C]1)O[C])O[C]               | -7.6 |
| 282014   | O1C2=[C]C(=[C]C(=C2[C][C]([C]1C1=[C][C]=C([C]=[C]1)O)O)O)O                            | -7.6 |
| 189551   | O1C(=C(C(=O)[C@]2([C][C]=[C]C(=C12)O[C])O)O[C])C1=[C][C]=[C][C]=[C]1                  | -7.6 |
| 182659   | O1C2=[C]C(=[C]C(=C2[C][C]([C]1C1=[C][C]=C(C(=[C]1)O[C])O[C])O)O[C])O[C]               | -7.6 |
| 124211   | O1C(=[C]C(=O)c2c(c(c(c12)O[C])O[C])O[C])O)C1=C([C]=[C][C]=C1O)O[C]                    | -7.6 |
| 97332    | o1c(c(c(=O)c2C(=[C]C(=[C]c12)O[C])O[C])O[C])C1=[C]C(=C([C]=[C]1)O[C])O[C]             | -7.6 |
| 97142    | o1c(c(c(=O)c2=C([C]=C([C]=c12)O[C])O[C])O)C1=[C]C(=C([C]=[C]1)O[C])O[C]               | -7.6 |
| 12988102 | O1[C]=C(C(=O)C2=[C][C]=C(C(=C12)[C]O)O)C1=[C]C(=C(C(=[C]1)[C]O)O)[C]O                 | -7.5 |

|               |                                                                                            |      |
|---------------|--------------------------------------------------------------------------------------------|------|
| 12981827<br>7 | O1C2=[C]C(=[C][C]=C2[C](C(=O)[C]1C1=[C][C]=[C][C]=[C]1)O[C])O                              | -7.5 |
| 12966152<br>7 | O1C2=[C]C(=[C]C(=C2[C](C(=O)[C@@]1(C1=[C][C]=[C][C]=[C]1)O)O)O)O                           | -7.5 |
| 10219490<br>9 | o1c(c(c(=O)c2c(c(c(c12)O[C])O[C][C]=C([C])[C])O[C])O[C])O[C])C1=[C][C]=C(C(=[C]1)O[C])O[C] | -7.5 |
| 91727421      | O1C2=C(C(=[C]C(=[C]2)O[C])O[C])C(=O)[C]([C]1C1=[C][C]=C(C(=[C]1)O[C])O[C])OC(=O)[C]        | -7.5 |
| 69047096      | C1(=C([C]=C([C]=[C]1)O[C]O[C])O[C]O[C])[C]1OC2=[C][C]=[C][C]=C2C(=O)[C]1                   | -7.5 |
| 56658060      | O1C2=[C]C(=[C]C(=C2C(=O)[C]([C]1C1=[C][C]=C(C(=[C]1)O[C])O)O)O)O                           | -7.5 |
| 54368735      | c1(c(=O)c2[C]=[C][C]=[C]c2oc1C1=[C]C=C(C(=[C]1)O[C])O[C])O[C])C(=O)N[C][C]Br               | -7.5 |
| 44566483      | O1C2=[C]C(=C(C(=C2C(=O)[C][C]1C1=[C][C]=C([C]=[C]1)O[C])O[C])O)O[C]                        | -7.5 |
| 44260053      | o1c(c(c(=O)c2c(c(c(c12)OC(=O)[C][C]([C])[C])O)O[C])O)O[C])C1=[C][C]=C([C]=[C]1)O[C]        | -7.5 |
| 44257043      | O1C(=[C][C]=C2[C](C(=C([C]=C12)O)O)O[C])C1=[C][C]=C(C(=[C]1)O)O[C]                         | -7.5 |
| 44133602      | O1[C]=C(C(=O)C2=C(C(=C([C]=C12)O)O[C])O)C1=[C]C=C(C(=[C]1)O[C])O)O[C]                      | -7.5 |
| 42608126      | O1c2c(c(c(c2C(=O)[C][C]1C1=[C]C(=C2C(=[C]1)O[C]O2)O[C])O[C])O[C])O[C]                      | -7.5 |
| 25058047      | o1c(c(c(=O)c2C(=[C]C(=C(c12)[C][C]=C([C])[C])O[C][C]O)O)O[C][C]O)C1=[C][C]=C([C]=[C]1)O[C] | -7.5 |
| 19358638      | O1C(=[C]C(=O)C2=C1[C]=C([C]=C2O[C])O[C][C]O)C1=[C][C]=C(C(=[C]1)O[C])O[C]                  | -7.5 |
| 15761521      | o1c2=[C][C]=[C][C]=c2c(=O)c(c1C1=[C][C]=[C][C]=[C]1)[C]([C])C#N                            | -7.5 |
| 14055876      | O1C(=[C]C(=O)C2=C1[C]=[C]C(=C2O[C])O[C])C1=[C][C]=C(C(=[C]1)O[C])O[C]                      | -7.5 |
| 11795367      | o1c(c(c(=O)c2c(c(c(c12)O[C])O)O[C])O[C])O[C])C1=[C]C2=C([C]=[C]1)O[C]O2                    | -7.5 |
| 11709692      | o1c(c(c(=O)c2C(=[C]C(=[C]c12)O)O[C])O)C1=[C][C]=C([C]=C1O[C])O                             | -7.5 |
| 11610052      | O1[C]=C(C(=O)C2=C1[C]=C([C]=C2O)O)C1=C(C(=C([C]=[C]1)O)O)[C][C]=C([C])[C]                  | -7.5 |
| 11500888      | O1C2=C(C(=[C]C(=[C]2)O)O[C])C(=O)[C]([C]1C1=[C][C]=C([C]=C1O[C])O)O                        | -7.5 |
| 11471620      | O1[C]=C(C(=O)C2=C1[C]=C([C]=[C]2)O[C])C1=[C][C]=C([C]=C1O)O                                | -7.5 |
| 9972910       | o1c(c(c(=O)c2=C([C]=C(C(=c12)O[C])O)O)O[C])C1=[C][C]=[C][C]=[C]1                           | -7.5 |
| 7309334       | O1C2=[C][C]=[C][C]=C2[C][C]([C]1C1=[C][C]=[C][C]=[C]1)O                                    | -7.5 |
| 6453535       | o1c(c(c(=O)c2C(=C(C(=[C]c12)O[C])O[C])O)O)C1=[C][C]=C(C(=[C]1)O[C])O                       | -7.5 |
| 5459184       | o1c(c(c(=O)c2=C([C]=C(C(=c12)O[C])O[C])O)O[C])C1=[C]C=C([C]=[C]1)O)O[C]                    | -7.5 |
| 5407860       | O1[C]=C(C(=O)C2=C1C(=C([C]=[C]2)O)O)C1=[C][C]=[C][C]=[C]1                                  | -7.5 |



|          |                                                                                        |      |
|----------|----------------------------------------------------------------------------------------|------|
| 5380187  | o1c(c(c(=O)c2C(=[C]C(=[C]c12)O)O)C1=[C][C]=C([C]=[C]1)O[C])C(=O)O[C][C]                | -7.5 |
| 5379262  | o1c(c(c(=O)c2c(c(c(c12)O[C])O[C])O[C])O)O)C1=[C][C]=[C][C]=[C]1                        | -7.5 |
| 5377381  | O1[C]=C(C(=O)C2=C1[C]=C([C]=C2O)O)C1=[C][C]=[C][C]=[C]1                                | -7.5 |
| 5321435  | o1c(c(c(=O)c2C(=C(C(=[C]c12)O)O[C])O)O)C1=[C][C]=C(C(=[C]1)O[C])O                      | -7.5 |
| 5318041  | O1C(=[C]C(=O)c2c(c(c(c12)O[C])O[C])O[C])O[C])C1=[C][C]=C(C(=[C]1)O)O                   | -7.5 |
| 5281781  | O1[C]=C(C(=O)C2=C1[C]=C(C(=C2O)O[C])O)C1=[C][C]=C([C]=[C]1)O[C]                        | -7.5 |
| 5281676  | o1c2=[C]C(=[C]C(=c2c(=O)c(c1C1=[C]C(=C([C]=C1O)O[C])O)O[C])O)O[C]                      | -7.5 |
| 5280699  | o1c(c(c(=O)c2C(=C(C(=[C]c12)O[C])O[C])O)O[C])C1=[C]C(=C([C]=[C]1)O)O                   | -7.5 |
| 3083840  | O1[C]=C(C(=O)C2=[C]C(=C([C]=C12)OC(=O)[C])O[C])C1=[C][C]=C([C]=[C]1)O[C]               | -7.5 |
| 638006   | O1[C]=C(C(=O)C2=C1[C]=C([C]=[C]2)O[C])C1=[C][C]=[C][C]=[C]1                            | -7.5 |
| 634724   | o1c(c(c(=O)c2C(=C(C(=[C]c12)O[C][C])O[C])O[C][C])O[C])C1=[C]C(=C([C]=[C]1)O[C][C])O[C] | -7.5 |
| 631176   | O1[C]=C(C(=O)C2=[C]C(=C([C]=C12)O[C])O[C])C1=[C][C]=C(C(=[C]1)O[C])O[C]                | -7.5 |
| 631171   | o1c2=[C]C(=[C][C]=c2c(=O)c(c1C1=[C]C(=C([C]=[C]1)O[C])O[C])O[C])O[C]                   | -7.5 |
| 442583   | O1C(=[C]C(=O)C2=C1[C]=C(C(=C2O[C])O[C])O[C])C1=[C][C]=[C][C]=[C]1                      | -7.5 |
| 386331   | o1c(c(c(=O)c2=C(C(=C([C]=c12)O[C])O[C])O[C])O[C])C1=[C]C(=C([C]=[C]1)O[C])O[C]         | -7.5 |
| 358832   | O1C(=[C]C(=O)c2c(c(c(c12)O[C])O[C])O[C])O)C1=[C][C]=C(C(=[C]1)O[C])O[C]                | -7.5 |
| 253959   | O1C2=[C][C]=[C][C]=C2[C]([C][C]1C1=[C][C]=[C][C]=[C]1)O                                | -7.5 |
| 245874   | O1C2=[C]C(=C(C(=C2C(=O)[C][C]1C1=[C][C]=C([C]=[C]1)O[C])O[C])O)O[C]                    | -7.5 |
| 181092   | O1C(=[C]C(=O)c2c(c(c(c12)O[C])O[C])O[C])O)C1=[C]C(=C([C]=[C]1)O)O[C]                   | -7.5 |
| 167616   | O1C2=C(C(=[C]C(=[C]2)O[C])O[C])C(=O)[C][C]1C1=[C]C(=C([C]=[C]1)O[C])O[C]               | -7.5 |
| 162464   | O1C(=[C]C(=O)C2=C1[C]=C(C(=C2O)O[C])O[C])C1=[C][C]=C(C(=[C]1)O[C])O                    | -7.5 |
| 136420   | O1[C]=C(C(=O)C2=C([C]=C([C]=C12)O[C])O[C])C1=[C][C]=C([C]=[C]1)O[C]                    | -7.5 |
| 97151    | O1C(=[C]C(=O)c2c(c(c(c12)O[C])O[C])O[C])O[C])C1=[C][C]=C2C(=[C]1)O[C]O2                | -7.5 |
| 54799    | o1c(c(c(=O)c2c(c(c(c12)O[C])O[C])O[C])O)O[C])C1=[C][C]=C(C(=[C]1)O)O                   | -7.5 |
| 12988780 | o1c2=[C][C]=C(C(=c2c(=O)c(c1C1=[C]C(=C([C]=[C]1)O[C])O[C])O[C])O)O                     | -7.4 |
| 1        |                                                                                        |      |
| 12982055 | o1c(c(c(=O)c2=C([C]=C(C(=c12)O[C])O[C])O[C])O)C1=[C]C(=C([C]=[C]1)O[C])O[C]            | -7.4 |
| 4        |                                                                                        |      |

|                             |                                                                                          |      |
|-----------------------------|------------------------------------------------------------------------------------------|------|
| <b>12973375</b><br><b>0</b> | Cl[C]1C2=C([C]=[C][C]=[C]2)O[C]([C]1O)C1=[C][C]=[C][C]=[C]1                              | -7.4 |
| <b>12973362</b><br><b>2</b> | O1C2=C(C(=C([C]=[C]2)O[C])O)C(=O)C([C@@]1(C1=[C][C]=[C][C]=[C]1)O)(O)O                   | -7.4 |
| <b>12967478</b><br><b>1</b> | O1C2=C([C]=[C][C]=[C]2)[C][C]([C]1C1=[C][C]=[C][C]=[C]1)O[C]                             | -7.4 |
| <b>12903597</b><br><b>6</b> | O1C2=C([C]=[C][C]=[C]2)[C][C]([C]1C1=[C][C]=[C][C]=[C]1)O                                | -7.4 |
| <b>10218073</b><br><b>9</b> | o1c2[C]=[C][C]=[C]c2c(=O)c(c1C1=C(C(=C([C]=[C]1)O[C])O[C])O[C])C1=[C][C]=C([C]=[C]1)O[C] | -7.4 |
| <b>10156189</b><br><b>8</b> | o1c2[C]=[C][C]=[C]c2c(=O)c(c1C1=[C][C]=[C][C]=[C]1)O[C]C#[C]                             | -7.4 |
| <b>86641846</b>             | O1C(=[C]C(=O)C2=C([C]=C([C]=C12)O[C]C#[C])O[C])C1=[C]C(=C([C]=[C]1)O[C])O[C]             | -7.4 |
| <b>71428798</b>             | O1[C]=C(C(=O)C2=C1C(=C([C]=[C]2)O)O[C])C1=[C][C]=C([C]=[C]1)O                            | -7.4 |
| <b>71346541</b>             | o1c2[C]=[C][C]=[C]c2c(=O)c(c1C1=[C][C]=C([C]=[C]1)N([C])[C])O[C]                         | -7.4 |
| <b>67200543</b>             | O1C2=C([C]=[C][C]=[C]2)C(=O)[C]([C]1C1=[C][C]=[C][C]=[C]1)C(=O)OC([C])([C])[C]           | -7.4 |
| <b>66916672</b>             | o1c2=[C][C]=[C][C]=c2c(=O)c(c1C(=O)[C])C1=[C][C]=[C][C]=[C]1                             | -7.4 |
| <b>66692593</b>             | O1C2=C([C]=[C][C]=[C]2)[C][C]([C]1C1=[C][C]=[C][C]=[C]1)O                                | -7.4 |
| <b>59331779</b>             | O1C(=[C]C(=O)C2=C1[C]=C([C]=C2O[C])O[C]C#N)C1=[C][C]=C(C(=[C]1)O[C])O[C]                 | -7.4 |
| <b>54140747</b>             | c1(c(=O)c2=[C][C]=[C][C]=c2oc1C1=[C][C]=[C][C]=[C]1)OS([O])([O])O                        | -7.4 |
| <b>23644935</b>             | o1c2=[C]C(=[C][C]=c2c(=O)c(c1N1[C]=N[C]=N1)C1=[C][C]=[C][C]=[C]1)O[C]                    | -7.4 |
| <b>23644932</b>             | o1c2=[C]C(=[C][C]=c2c(=O)c(c1N1[C]=N[C]=[C]1)C1=[C][C]=C([C]=[C]1)O[C])O[C]              | -7.4 |
| <b>23644623</b>             | o1c2=[C]C(=[C][C]=c2c(=O)c(c1N1[C]=N[C]=[C]1)C1=[C][C]=[C][C]=[C]1)O[C]                  | -7.4 |
| <b>21270160</b>             | O1[C]=C(C(=O)C2=[C][C]=C(C(=C12)[C])O)C1=[C][C]=C([C]=[C]1)[C]                           | -7.4 |
| <b>15625549</b>             | O1c2c(c(c(c2C(=O)[C][C]1C1=[C]C(=C([C]=[C]1)O[C])O[C])O[C])O[C])O[C]                     | -7.4 |
| <b>14756305</b>             | O1C2=[C]C(=[C]C(=C2C(=O)[C]([C])[C]1C1=[C][C]=C([C]=[C]1)O)O)O                           | -7.4 |
| <b>14630603</b>             | O1[C]=C(C(=O)C2=C(C3=C([C]=C12)O[C]O3)O[C])C1=[C][C]=[C]C(=C1O[C])O[C]                   | -7.4 |
| <b>13045744</b>             | O1C2=C(C(=[C]C(=[C]2)O[C])O[C])[C][C][C]1C1=[C]C(=C([C]=[C]1)O[C])O[C]                   | -7.4 |
| <b>13045742</b>             | O1C2=C(C(=[C]C(=[C]2)O[C])O[C])[C][C][C]1C1=[C]C(=C([C]=[C]1)O[C])O[C]                   | -7.4 |
| <b>11797078</b>             | o1c(c(c(=O)c2c(c(c(c12)O[C])O[C])O[C]O[C])O[C])O)C1=[C]C(=C([C]=[C]1)O)O[C]              | -7.4 |

|               |                                                                                     |      |
|---------------|-------------------------------------------------------------------------------------|------|
| 10937632      | O1C2=C(C(=C(C(=[C]2)O[C])O[C])O[C])C(=O)[C][C]1C1=[C]C(=C([C]=[C]1)O[C])O[C]        | -7.4 |
| 5386963       | o1c(c(c(=O)c2c(c(c(c12)O[C])O)O[C])O)O[C]C1=[C]C(=C(C(=[C]1)O[C])O[C])O[C]          | -7.4 |
| 5384810       | o1c(c(c(=O)c2=C([C]=C(C(=c12)OC(=O)[C][C][C])O[C])O)O)C1=[C][C]=C([C]=[C]1)O[C]     | -7.4 |
| 5281704       | O1[C]=C(C(=O)C2=C1[C]=C(C(=[C]2)O[C])O)C1=[C][C]=C([C]=[C]1)O[C]                    | -7.4 |
| 5003667       | O1C2=[C]C(=[C]C(=C2C(=O)[C][C]1C1=[C][C]=C([C]=[C]1)O[C])O[C])O[C]                  | -7.4 |
| 3084507       | O1C(=[C]C(=O)c2c(c(c(c12)O[C])O[C])O[C])O)C1=[C]C(=C(C(=[C]1)O[C])O[C])O            | -7.4 |
| 1560918       | C1(=[C]C2=C([C]=[C]1)C(=O)C(=[C]O2)C1=C([C]=[C][C]=[C]1)O[C])OS([C])([O])[O]        | -7.4 |
| 633456        | o1c2=[C]C(=[C][C]=c2c(=O)c(c1[C])C1=C([C]=C(C(=[C]1)O[C])O[C])O[C])OC(=O)[C]        | -7.4 |
| 631170        | O1C(=[C]C(=O)C2=C1[C]=C([C]=C2O[C])O[C])C1=[C][C]=C(C(=[C]1)O[C])O[C]               | -7.4 |
| 631095        | o1c(c(c(=O)c2C(=[C]C(=[C]c12)O[C])O[C])O[C])C1=[C][C]=C([C]=[C]1)O[C]               | -7.4 |
| 628412        | o1c(c(c(=O)c2C(=[C]C(=[C]c12)O[C])O[C])O[C])C1=[C][C]=[C][C]=C1O[C]                 | -7.4 |
| 614295        | [C]1(C(=O)C2=C([C]=[C][C]=[C]2)O[C]1C1=[C][C]=[C][C]=[C]1)S[C][C][C]                | -7.4 |
| 462698        | O1c2c(c(c(c2C(=O)[C][C]1C1=[C][C]=C([C]=[C]1)O[C])O[C])O[C])O[C]O[C]                | -7.4 |
| 462695        | O1C2=C(C(=[C]C(=[C]2)O[C])O[C])C(=O)[C]([C]1C1=[C]C(=C([C]=[C]1)O[C])O[C])O         | -7.4 |
| 242486        | O1C2=C(C(=C(C(=[C]2)O[C])O[C])O[C])C(=O)[C][C]1C1=[C][C]=C([C]=[C]1)O[C]            | -7.4 |
| 12986412<br>1 | o1c2[C]=C([C]=C(c2c(=O)c(c1C1=[C][C]=C([C]=[C]1)O[C](C(=[C])[C])[C]O)O[C])O)O[C]    | -7.3 |
| 12983478<br>8 | o1c(c(c(=O)c2C(=C(C(=[C]c12)O[C])O[C])O[C])O[C][C])C1=[C][C]=C(C(=[C]1)O[C][C])O[C] | -7.3 |
| 12982594<br>3 | O1C2=[C]C(=[C]C(=C2C(=O)[C]=C1C1=[C][C]=[C][C]=C1C(=O)[C][C][C][C])O)O[C]           | -7.3 |
| 44257042      | O1C(=[C][C]=C2[C](C(=C([C]=C12)O)O)O[C])C1=[C][C]=C(C(=[C]1)O)O                     | -7.3 |
| 14606539      | o1c(c(c(=O)c2=C(C(=C([C]=c12)O[C])O[C])O[C])O)C1=[C][C]=[C][C]=[C]1                 | -7.3 |
| 14304977      | o1c2=[C][C]=[C][C]=c2c(=O)c(c1C1=[C]C(=C(C(=[C]1)O[C])O[C])O[C])C(=O)O              | -7.3 |
| 12578908      | O1C2=[C]C(=[C]C(=C2C(=O)[C]([C]1)C1=[C][C]=[C][C]=[C]1)O)O                          | -7.3 |
| 12088189      | o1c2[C]=[C][C]=[C]c2c(=O)c(c1C1=[C][C]=C([C]=[C]1)N([C][C])[C][C])O                 | -7.3 |
| 11244229      | c1(c(c(=O)c2[C]=[C]C(=[C]c2o1)O[C])C1=[C][C]=[C][C]=[C]1)S[C][C]=[C]                | -7.3 |
| 10386481      | O1C(=[C]C(=O)c2c(c(c(c12)O[C])O[C])O[C])O)C1=[C]C(=C(C(=[C]1)O[C])O)O[C]            | -7.3 |
| 6710704       | O1[C]=C(C(=O)C2=C([C]=C([C]=C12)O[C])O[C])C1=[C][C]=[C][C]=[C]1                     | -7.3 |

|                             |                                                                                                            |      |
|-----------------------------|------------------------------------------------------------------------------------------------------------|------|
| <b>5318979</b>              | $O1C2=[C][C]=[C][C]=C2[C]([C]([C]1C1=[C][C]=[C][C]=[C]1)O)O$                                               | -7.3 |
| <b>631105</b>               | $o1c2[C]=C([C]=C(c2c(=O)c(c1C1=C([C]=C([C]=[C]1)O[C])O[C])O[C])O[C]O[C]$                                   | -7.3 |
| <b>150893</b>               | $o1c(c(c(=O)c2c(c(c(c12)O[C])O[C])O[C])O[C])O[C])C1=[C]C=C([C]=[C]1)O[C]O[C]$                              | -7.3 |
| <b>96118</b>                | $O1C(=[C]C(=O)C2=C1[C]=C(C(=C2O[C])O[C])O[C])C1=[C][C]=C([C]=[C]1)O[C]$                                    | -7.3 |
| <b>79730</b>                | $O1C(=[C]C(=O)C2=C1[C]=C([C]=C2O[C])O[C])C1=[C][C]=C([C]=[C]1)O[C]$                                        | -7.3 |
| <b>12989197</b><br><b>2</b> | $O1[C]=C(C(=O)C2=[C][C]=C(C(=C12)O[C])O)C1=[C][C]=C([C]=C1O)O[C]$                                          | -7.2 |
| <b>12976274</b><br><b>2</b> | $O1C2=C(C(=[C]C(=[C]2)O[C])O)C(=O)C([C]1C1=[C][C]=C([C]=[C]1)O[C])(O)O$                                    | -7.2 |
| <b>12967461</b><br><b>9</b> | $[C]1(C2=C([C]=[C][C]=[C]2)O[C]([C]1)C1=[C][C]=[C][C]=[C]1)S$                                              | -7.2 |
| <b>12403736</b><br><b>3</b> | $O1C2=C([C]=[C][C]=[C]2)[C]([C]([C]1C1=[C][C]=[C][C]=[C]1)O)O$                                             | -7.2 |
| <b>91584129</b>             | $O1C2=[C]C(=C(C(=C2C(=O)[C]=C1C1=[C][C]=C(C(=C1O[C])O[C])O)O)O[C])O$                                       | -7.2 |
| <b>44257041</b>             | $O1C(=[C][C]=C2[C](C(=C([C]=C12)O)O)O[C])C1=[C][C]=C([C]=[C]1)O$                                           | -7.2 |
| <b>21573556</b>             | $O1C2=C(C(=[C]C(=[C]2)O[C])O[C])C(=O)[C][C]1C1=[C][C]=C(C(=C1O[C])O[C])O[C]$                               | -7.2 |
| <b>12405140</b>             | $O1C2=[C]C(=C(C(=C2C(=O)[C][C]1C1=[C][C]=C(C(=[C]1)O[C])O[C])O[C])O[C])O[C]$                               | -7.2 |
| <b>6399103</b>              | $O1C2=[C][C]=[C][C]=C2C(=O)[C]([N]O)[C]1C1=[C][C]=[C][C]=[C]1$                                             | -7.2 |
| <b>5487785</b>              | $O1[C]=C(C(=O)C2=C(C(=C([C]=C12)O[C])O[C])O)C1=[C][C]=C([C]=[C]1)O$                                        | -7.2 |
| <b>1546800</b>              | $O1C2=C([C]=[C][C]=[C]2)C(=O)[C]([C]1C1=[C][C]=[C][C]=[C]1)O$                                              | -7.2 |
| <b>632958</b>               | $O1[C]=C(C(=O)C2=[C]C(=C([C]=C12)O[C])O[C])C1=[C]C(=C([C]=C1O[C])O[C])O[C]$                                | -7.2 |
| <b>632135</b>               | $O1C(=[C]C(=O)C2=C([C]=C(C(=C12)O[C])O[C])O[C])C1=[C]C(=C([C]=[C]1)O[C])O[C]$                              | -7.2 |
| <b>624831</b>               | $o1c(c(c(=O)c2=C([C]=C([C]=C12)O[C])O[C])O)C1=[C][C]=C([C]=[C]1)O[C]$                                      | -7.2 |
| <b>462694</b>               | $O1C2=[C]C(=[C][C]=C2C(=O)[C]([C]1C1=[C][C]=C([C]=[C]1)O[C])O[C])O$                                        | -7.2 |
| <b>261859</b>               | $O1C(=[C]C(=O)c2c(c(c(c12)O[C])O[C])O[C])O)C1=[C]C(=C(C(=[C]1)O[C])O[C])O[C]$                              | -7.2 |
| <b>155365</b>               | $O1C2=C(C3=C(C(=[C]2)O[C])C(=O)[C]=C(O3)C2=[C][C]=[C][C]=[C]2)[C]([C]1)[C](C([C])([C])OC(=O)[C])OC(=O)[C]$ | -7.2 |
| <b>145659</b>               | $O1C(=[C]C(=O)C2=C1[C]=C(C(=C2O[C])O[C])O[C])C1=[C][C]=C(C(=[C]1)O[C])O[C]$                                | -7.2 |
| <b>117900</b>               | $o1c(c(c(=O)c2C(=[C]C(=[C]c12)O[C])O[C])O[C])C1=[C][C]=[C][C]=[C]1$                                        | -7.2 |
| <b>68077</b>                | $O1C(=[C]C(=O)c2c(c(c(c12)O[C])O[C])O[C])O[C])C1=[C][C]=C([C]=[C]1)O[C]$                                   | -7.2 |

|               |                                                                                     |      |
|---------------|-------------------------------------------------------------------------------------|------|
| 13250796<br>0 | O1[C]=C(C(=O)C2=[C]C(=C([C]=C12)[C]O)O[C])C1=[C][C]=C([C]=[C]1)O                    | -7.1 |
| 12988909<br>7 | O1C2=C(C(=[C][C]=[C]2)[C])[C@]([C])([C@]([C])([C@]1([C])C1=[C][C]=[C][C]=[C]1)O)O   | -7.1 |
| 12988275<br>2 | O1[C]=C(C(=O)C2=C([C]=C(C(=C12)O[C])O[C])O[C])C1=[C][C]=C([C]=[C]1)O                | -7.1 |
| 12988261<br>5 | O1[C]([C]2C(=O)[C]3[C]=[C][C][C]1[C]3C2=O)C1=[C][C]=[C][C]=[C]1                     | -7.1 |
| 12984868<br>0 | o1c(c(c(=O)c2C=C([C]=C(c12)O[C])O[C])O[C])O[C])C1=[C][C]=C(C(=[C]1)O[C])O[C]        | -7.1 |
| 23270524      | O1C2=[C]C(=[C]C(=C2C(=O)[C])([C]1C1=C([C]=C([C]=[C]1)O[C])O[C])OC(=O)[C])O[C])O[C]  | -7.1 |
| 15761527      | C1(C(=O)C2=[C][C]=[C][C]=C2O[C]1C1=[C][C]=[C][C]=[C]1)([C]Cl)[C]Cl                  | -7.1 |
| 14034216      | o1c(c(c(=O)c2=C([C]=C(C(=c12)O[C])O[C])O)O)C1=[C]C=C([C]=[C]1)O[C])O[C]             | -7.1 |
| 10526049      | o1c(c(c(=O)c2c(c(c(c12)O[C])O[C])O[C]O[C])O[C])O)C1=[C][C]=C([C]=[C]1)O[C]          | -7.1 |
| 5320351       | o1c(c(c(=O)c2=C(C(=C([C]=c12)O[C])O[C])O)O)C1=[C][C]=C(C(=[C]1)O[C])O[C]            | -7.1 |
| 72344         | O1C(=[C]C(=O)c2c(c(c(c12)O[C])O[C])O[C])O[C])C1=[C][C]=C(C(=[C]1)O[C])O[C]          | -7.1 |
| 13903076<br>7 | O1[C]=C(C(=O)C2=[C][C]=C(C(=C12)O[C])C(=O)[C][C]O)C1=[C][C]=C([C]=[C]1)O[C]         | -7   |
| 12982441<br>8 | O1C2=[C][C]=[C][C]=C2[C][C]([C@]1(C1=[C][C]=[C][C]=[C]1)[C]C(=O)O)O                 | -7   |
| 12981808<br>8 | Br[C@]1(C(=O)C2=[C][C]=[C][C]=C2O[C]1C1=[C][C]=[C][C]=[C]1)N(=O)=O                  | -7   |
| 66780856      | O1C2=C(C(=[C][C]=[C]2)O)C(=O)C([C@]1(C1=[C][C]=[C][C]=[C]1)O[C])(O)O                | -7   |
| 44257040      | O1C(=[C][C]=C2[C](C(=C([C]=C12)O)O)O[C])C1=[C][C]=C([C]=[C]1)O[C]                   | -7   |
| 24850296      | O1C2=[C]C(=[C]C(=C2C(=O)[C@]([C@]1(C1=[C][C]=C(C(=[C]1)O)O)O[C])(O)[C]C(=O)O[C])O)O | -7   |
| 631156        | O1[C]=C(C(=O)C2=C1C(=C([C]=[C]2)O[C])O[C])C1=C([C]=C([C]=[C]1)O[C])O[C]             | -7   |
| 185670        | O1C(=[C]C(=O)C2=C1[C]=C(C(=C2O[C])O[C])O[C])C1=[C]C=C(C(=[C]1)O[C])O[C])O[C]        | -7   |
| 165203        | O1[C]=C(C(=O)C2=C1[C]=C([C]=[C]2)O[C])C1=[C]C=C(C([C]=C1O[C])O[C])O[C]              | -7   |
| 10195886<br>2 | O1C2=[C][C]=[C][C]=C2C(=O)[C][C@]1(C1=[C][C]=[C][C]=[C]1)C(=O)O                     | -6.9 |

|                             |                                                                                        |      |
|-----------------------------|----------------------------------------------------------------------------------------|------|
| <b>44257169</b>             | O1c2c3[C]=[C]Oc3c(c(c2[C])([C]([C]1C1=[C][C]=[C][C]=[C]1)O[C])O[C])O[C]                | -6.9 |
| <b>389000</b>               | o1c(c(c(=O)c2c(c(c(c12)O[C])O[C])O[C])O[C])O[C])C1=[C]C(=C(C(=[C]1)O[C])O[C])O[C]      | -6.9 |
| <b>13228149</b><br><b>8</b> | O1C2=C(C(=C(C(=[C]2)O[C])O[C])O[C])C(=O)C([C@]1(C1=[C][C]=[C][C]=[C]1)O[C])(O[C])O[C]  | -6.8 |
| <b>12987610</b><br><b>5</b> | O1C2=[C][C]=[C][C]=C2C(=O)[C][C@]1(C1=[C]NN=[C]1)C1=[C][C]=[C][C]=[C]1                 | -6.8 |
| <b>11741814</b>             | o1c(c(c(=O)c2c(c(c(c12)O[C])O[C])O[C])O[C])O[C])C1=[C][C]=C([C]=[C]1)O[C]              | -6.8 |
| <b>634440</b>               | o1c(c(c(=O)c2C(=C(C(=[C]c12)O[C])O[C][C])O[C][C])O[C])C1=[C]C(=C([C]=[C]1)O[C])O[C][C] | -6.8 |
| <b>12971327</b><br><b>4</b> | Cl[C@@]1([C]C(=S)C2=[C][C]=[C][C]=C2O1)C1=[C][C]=[C][C]=[C]1                           | -6.7 |
| <b>12967896</b><br><b>8</b> | [C]1(C2=[C][C]=[C][C]=C2O[C@]([C]1)(C1=[C][C]=[C][C]=[C]1)O[C])SOC(=O)[C]              | -6.7 |
| <b>629965</b>               | O1C(=[C]C(=O)C2=C1[C]=[C]C(=C2O[C])O[C])C1=C([C]=[C][C]=C1O[C])O[C]                    | -6.7 |
| <b>12977612</b><br><b>2</b> | O1C2=[C]C(=C(C(=C2C(=O)C([C]1C1=[C][C]=[C][C]=[C]1)(O[C])O[C])O)O)O[C]                 | -6.6 |
| <b>12967470</b><br><b>6</b> | O1C2=C([C]=[C][C]=[C]2)[C][C]([C@]1(C1=[C][C]=[C][C]=[C]1)[C]=O)O                      | -6.6 |
| <b>90690372</b>             | O1C2=[C][C]=[C][C]=C2C(=O)C([C@@]1(C1=[C][C]=[C][C]=[C]1)O[C])(O[C])O[C]               | -6.3 |
| <b>238791</b>               | C1(=C([C]=C([C]=C1C1=C(C(=[C]C(=[C]1)C(=O)[C])O[C])O[C])C(=O)[C])O[C])O[C]             | -6.3 |
| <b>16092266</b>             | ClC1=[C]C(=N[C]=N1)N1[C][C]N[C][C]1                                                    | -6   |
